# Supplementary material for: Perceptions of the impact of COVID-19 in Tennessee, USA: a retrospective study
Source: PeerJ. 2023 Jul 10;11:e15473. doi: 10.7717/peerj.15473 (PMC10340107; doi:10.7717/peerj.15473)
Supplement: Supplemental Information 1 [file peerj-11-15473-s001.xls]

## Sheet: Sheet1
Wave of Survey	Age, open ended	Gender, discrete choice	County	American Indian or Alaskan Native, check all that apply	Asian or Pacific Islander, check all that apply	Black or African American, check all that apply	Hispanic or Latino, check all that apply	White or Caucasian, check all that apply	Other, check all that apply	Employment status, discrete choice	What is your relationship status	Children under the age of 18 living in home	Older adults over age of 50 living in home	Concern about contracting COVID-19	Concern about own health and wellbeing	Concern about family's health and wellbeing	Concern about impact of COVID-19 on US	More important impact on family, health or economic?	Highest level of education attained	Household income	If vaccine was available for free, would you:	Region	Calculated variable for age	Calculated variable: Used to determine those who indicated multiple races	other_race	Over sample binary indicator for African American/Black respondents	OVERALL: Age/Gender by Category	OVERALL: African-American Weight by Region	OVERALL: Region Weight by Age and Gender	OVERALL: FINAL REGION WEIGHT	OVERALL: Region Weight	OVERALL: Region Weight with African-American Weight	OVERALL: State Age/Gender Weight	OVERALL: FINAL STATE WEIGHT	OVERALL:African American Sample by Age/Gender	OVERAL: FINAL AFRICAN-AMERICAN WEIGHT
1	19	Female	Davidson County	No	No	Yes	No	No	No	Work part-time	Single	Yes	No	Somewhat concerned	Somewhat concerned	Somewhat concerned	Somewhat concerned	Health impacts of COVID-19	High school graduate or GED	$50,000 - $74,999		6 County region	18-24	1	No	No	Female 18 thru 24	0.717294	0.654556	0.469509	0.730096	0.523693	0.698121	0.365601	0.394655	0.283084
1	92	Female	Hamilton County	No	No	No	No	Yes	No	Retired	Single	No	Yes	Not very concerned	Not very concerned	Not very concerned	Very concerned	Economic impacts of COVID-19	Some college or associate's degree	$35,000 - $49,999		6 County region	65+	1	No	No	Female 65+	1	1.01201	1.01201	0.730096	0.730096	1.05035	0.766853
1	67	Male	Shelby County	No	No	No	No	Yes	No	Work full-time	Married	No	No	Somewhat concerned	Somewhat concerned	Somewhat concerned	Very concerned	Economic impacts of COVID-19	Bachelor's degree or higher	$150,000 or more		6 County region	65+	1	No	No	Male 65+	1	1.7571	1.7571	0.730096	0.730096	1.31733	0.961778
1	54	Female	Sullivan County	No	No	No	No	Yes	No	Stay-at-Home Caregiver	Single	No	Yes	Not very concerned	Not very concerned	Somewhat concerned	Very concerned	Economic impacts of COVID-19	High school graduate or GED	$35,000 - $49,999		6 County region	45-54	1	No	No	Female 45 thru 54	1	0.817142	0.817142	0.730096	0.730096	0.850522	0.620963
1	44	Male	Hamilton County	No	No	No	No	Yes	No	Work full-time	Single	No	No	Somewhat concerned	Somewhat concerned	Somewhat concerned	Very concerned	Health impacts of COVID-19	Bachelor's degree or higher	$150,000 or more		6 County region	35-44	1	No	No	Male 35 thru 44	1	1.00481	1.00481	0.730096	0.730096	0.954872	0.697148
1	35	Male	Davidson County	No	No	Yes	No	No	No	Work full-time	Married	Yes	No	Extremely concerned	Very concerned	Very concerned	Not very concerned	Health impacts of COVID-19	High school graduate or GED	$25,000 - $34,999		6 County region	35-44	1	No	No	Male 35 thru 44	0.717294	1.00481	0.720747	0.730096	0.523693	0.954872	0.50006	1.07527	0.771287
1	50	Female	Davidson County	No	No	Yes	No	No	No	Work full-time	Married	No	Yes	Extremely concerned	Extremely concerned	Extremely concerned	Extremely concerned	Health impacts of COVID-19	Some college or associate's degree	$50,000 - $74,999		6 County region	45-54	1	No	No	Female 45 thru 54	0.717294	0.817142	0.586131	0.730096	0.523693	0.850522	0.445413	0.900985	0.646271
1	42	Female	Shelby County	No	No	Yes	No	No	No	Unemployed	Divorced	Yes	No	Extremely concerned	Extremely concerned	Extremely concerned	Extremely concerned	Economic impacts of COVID-19	Bachelor's degree or higher	$35,000 - $49,999		6 County region	35-44	1	No	No	Female 35 thru 44	0.717294	0.763453	0.54762	0.730096	0.523693	0.802961	0.420505	0.733349	0.526027
1	52	Female	Shelby County	No	No	No	No	Yes	No	Work full-time	Divorced	No	Yes	Somewhat concerned	Somewhat concerned	Somewhat concerned	Very concerned	Health impacts of COVID-19	Some college or associate's degree	$50,000 - $74,999		6 County region	45-54	1	No	No	Female 45 thru 54	1	0.817142	0.817142	0.730096	0.730096	0.850522	0.620963
1	43	Female	Knox County	No	No	No	No	Yes	No	Work full-time	Married	No	Yes	Extremely concerned	Extremely concerned	Very concerned	Very concerned	Economic impacts of COVID-19	Bachelor's degree or higher	$100,000 - $149,999		6 County region	35-44	1	No	No	Female 35 thru 44	1	0.763453	0.763453	0.730096	0.730096	0.802961	0.586239
1	27	Female	Hamilton County	No	No	No	No	Yes	No	Work full-time	Married	No	No	Extremely concerned	Very concerned	Somewhat concerned	Very concerned	Health impacts of COVID-19	Bachelor's degree or higher	$50,000 - $74,999		6 County region	25-34	1	No	No	Female 25 thru 34	1	0.911825	0.911825	0.730096	0.730096	0.854477	0.62385
1	61	Female	Hamilton County	No	No	No	No	Yes	No	Retired	Married	No	Yes	Very concerned	Very concerned	Extremely concerned	Extremely concerned	Health impacts of COVID-19	Bachelor's degree or higher	$100,000 - $149,999		6 County region	55-64	1	No	No	Female 55 thru 64	1	0.850711	0.850711	0.730096	0.730096	0.862899	0.629999
1	41	Male	Davidson County	No	No	No	No	Yes	No	Work part-time	Living with someone	Yes	No	Somewhat concerned	Somewhat concerned	Very concerned	Very concerned	Economic impacts of COVID-19	Some college or associate's degree	$50,000 - $74,999		6 County region	35-44	1	No	No	Male 35 thru 44	1	1.00481	1.00481	0.730096	0.730096	0.954872	0.697148
1	60	Female	Hamilton County	No	No	No	No	Yes	No	Work full-time	Married	No	Yes	Somewhat concerned	Somewhat concerned	Somewhat concerned	Somewhat concerned	Economic impacts of COVID-19	Bachelor's degree or higher	$35,000 - $49,999		6 County region	55-64	1	No	No	Female 55 thru 64	1	0.850711	0.850711	0.730096	0.730096	0.862899	0.629999
1	64	Female	Shelby County	No	No	No	No	Yes	No	Retired	Separated	No	Yes	Extremely concerned	Somewhat concerned	Very concerned	Extremely concerned	Economic impacts of COVID-19	Bachelor's degree or higher	$25,000 - $34,999		6 County region	55-64	1	No	No	Female 55 thru 64	1	0.850711	0.850711	0.730096	0.730096	0.862899	0.629999
1	68	Female	Sullivan County	No	No	No	No	Yes	No	Unemployed	Single	No	No	Somewhat concerned	Very concerned	Extremely concerned	Extremely concerned	Health impacts of COVID-19	Some college or associate's degree	$25,000 - $34,999		6 County region	65+	1	No	No	Female 65+	1	1.01201	1.01201	0.730096	0.730096	1.05035	0.766853
1	33	Male	Sullivan County	No	No	No	No	Yes	No	Work full-time	Single	Yes	No	Somewhat concerned	Somewhat concerned	Very concerned	Somewhat concerned	Economic impacts of COVID-19	Some college or associate's degree	$50,000 - $74,999		6 County region	25-34	1	No	No	Male 25 thru 34	1	1.42702	1.42702	0.730096	0.730096	1.31307	0.958666
1	60	Female	Hamilton County	No	No	No	No	Yes	No	Work full-time	Married	No	Yes	Somewhat concerned	Somewhat concerned	Very concerned	Somewhat concerned	Economic impacts of COVID-19	Bachelor's degree or higher	$35,000 - $49,999		6 County region	55-64	1	No	No	Female 55 thru 64	1	0.850711	0.850711	0.730096	0.730096	0.862899	0.629999
1	22	Female	Shelby County	No	No	Yes	No	No	No	Work full-time	Married	No	Yes	Extremely concerned	Extremely concerned	Extremely concerned	Very concerned	Health impacts of COVID-19	Bachelor's degree or higher	$35,000 - $49,999		6 County region	18-24	1	No	No	Female 18 thru 24	0.717294	0.654556	0.469509	0.730096	0.523693	0.698121	0.365601	0.394655	0.283084
1	66	Female	Knox County	No	No	No	No	Yes	No	Work part-time	Divorced	No	Yes	Very concerned	Somewhat concerned	Very concerned	Somewhat concerned	Health impacts of COVID-19	Bachelor's degree or higher	$25,000 - $34,999		6 County region	65+	1	No	No	Female 65+	1	1.01201	1.01201	0.730096	0.730096	1.05035	0.766853
1	19	Female	Shelby County	No	No	No	No	Yes	No	Student	Single	Yes	Yes	Extremely concerned	Very concerned	Extremely concerned	Extremely concerned	Economic impacts of COVID-19	Some college or associate's degree	$50,000 - $74,999		6 County region	18-24	1	No	No	Female 18 thru 24	1	0.654556	0.654556	0.730096	0.730096	0.698121	0.509695
1	68	Female	Sullivan County	No	No	No	No	Yes	No	Unemployed	Single	No	No	Very concerned	Somewhat concerned	Very concerned	Extremely concerned	Health impacts of COVID-19	Some college or associate's degree	$25,000 - $34,999		6 County region	65+	1	No	No	Female 65+	1	1.01201	1.01201	0.730096	0.730096	1.05035	0.766853
1	75	Female	Hamilton County	No	No	No	No	Yes	No	Retired	Divorced	No	Yes	Very concerned	Very concerned	Very concerned	Very concerned	Economic impacts of COVID-19	High school graduate or GED	Less than $15,000		6 County region	65+	1	No	No	Female 65+	1	1.01201	1.01201	0.730096	0.730096	1.05035	0.766853
1	59	Female	Knox County	No	No	No	No	Yes	No	Unemployed	Married	No	Yes	Extremely concerned	Very concerned	Extremely concerned	Extremely concerned	Health impacts of COVID-19	Bachelor's degree or higher	$50,000 - $74,999		6 County region	55-64	1	No	No	Female 55 thru 64	1	0.850711	0.850711	0.730096	0.730096	0.862899	0.629999
1	73	Female	Shelby County	No	No	No	No	Yes	No	Retired	Married	No	Yes	Not very concerned	Somewhat concerned	Somewhat concerned	Extremely concerned	Health impacts of COVID-19	Bachelor's degree or higher	$150,000 or more		6 County region	65+	1	No	No	Female 65+	1	1.01201	1.01201	0.730096	0.730096	1.05035	0.766853
1	62	Male	Sullivan County	No	No	No	No	Yes	No	Retired	Separated	No	Yes	Not very concerned	Not at all concerned	Not at all concerned	Very concerned	Economic impacts of COVID-19	Bachelor's degree or higher	$25,000 - $34,999		6 County region	55-64	1	No	No	Male 55 thru 65	1	1.15827	1.15827	0.730096	0.730096	1.10949	0.810036
1	27	Male	Davidson County	No	No	No	No	Yes	No	Work full-time	Married	No	Yes	Somewhat concerned	Very concerned	Very concerned	Extremely concerned	Health impacts of COVID-19	Some college or associate's degree	$50,000 - $74,999		6 County region	25-34	1	No	No	Male 25 thru 34	1	1.42702	1.42702	0.730096	0.730096	1.31307	0.958666
1	68	Male	Sullivan County	No	No	No	No	Yes	No	Unemployed	Single	No	No	Very concerned	Somewhat concerned	Extremely concerned	Extremely concerned	Health impacts of COVID-19	Some college or associate's degree	$25,000 - $34,999		6 County region	65+	1	No	No	Male 65+	1	1.7571	1.7571	0.730096	0.730096	1.31733	0.961778
1	42	Female	Shelby County	No	No	Yes	No	No	No	Work full-time	Married	Yes	No	Somewhat concerned	Somewhat concerned	Somewhat concerned	Very concerned	Economic impacts of COVID-19	Bachelor's degree or higher	$75,000 - $99,999		6 County region	35-44	1	No	No	Female 35 thru 44	0.717294	0.763453	0.54762	0.730096	0.523693	0.802961	0.420505	0.733349	0.526027
1	27	Female	Knox County	No	No	No	No	Yes	No	Unemployed	Single	No	No	Somewhat concerned	Very concerned	Very concerned	Very concerned	Health impacts of COVID-19	Some college or associate's degree	Less than $15,000		6 County region	25-34	1	No	No	Female 25 thru 34	1	0.911825	0.911825	0.730096	0.730096	0.854477	0.62385
1	37	Male	Davidson County	No	No	No	No	Yes	No	Work full-time	Married	Yes	No	Very concerned	Very concerned	Extremely concerned	Very concerned	Economic impacts of COVID-19	Bachelor's degree or higher	$100,000 - $149,999		6 County region	35-44	1	No	No	Male 35 thru 44	1	1.00481	1.00481	0.730096	0.730096	0.954872	0.697148
1	33	Female	Knox County	No	No	No	No	Yes	No	Work full-time	Married	Yes	Yes	Extremely concerned	Very concerned	Extremely concerned	Very concerned	Health impacts of COVID-19	Bachelor's degree or higher	$75,000 - $99,999		6 County region	25-34	1	No	No	Female 25 thru 34	1	0.911825	0.911825	0.730096	0.730096	0.854477	0.62385
1	33	Male	Knox County	No	No	No	No	Yes	No	Work part-time	Single	No	No	Extremely concerned	Extremely concerned	Extremely concerned	Extremely concerned	Economic impacts of COVID-19	High school graduate or GED	$15,000 - $24,999		6 County region	25-34	1	No	No	Male 25 thru 34	1	1.42702	1.42702	0.730096	0.730096	1.31307	0.958666
1	48	Female	Davidson County	No	No	No	No	Yes	No	Work full-time	Single	Yes	No	Not at all concerned	Not at all concerned	Somewhat concerned	Somewhat concerned	Health impacts of COVID-19	High school graduate or GED	Less than $15,000		6 County region	45-54	1	No	No	Female 45 thru 54	1	0.817142	0.817142	0.730096	0.730096	0.850522	0.620963
1	48	Female	Davidson County	No	No	No	No	Yes	No	Work part-time	Single	No	No	Extremely concerned	Extremely concerned	Extremely concerned	Extremely concerned	Economic impacts of COVID-19	Some college or associate's degree	Less than $15,000		6 County region	45-54	1	No	No	Female 45 thru 54	1	0.817142	0.817142	0.730096	0.730096	0.850522	0.620963
1	19	Male	Knox County	No	No	Yes	No	No	No	Work full-time	Married	Yes	Yes	Not very concerned	Somewhat concerned	Extremely concerned	Not very concerned	Economic impacts of COVID-19	Some college or associate's degree	Less than $15,000		6 County region	18-24	1	No	No	Male 18 thru 24	0.717294	1.23261	0.884145	0.730096	0.523693	1.24389	0.651415	0.8773	0.629282
1	49	Male	Davidson County	No	No	Yes	No	No	No	Work full-time	Married	No	No	Very concerned	Very concerned	Very concerned	Extremely concerned	Health impacts of COVID-19	Bachelor's degree or higher	$75,000 - $99,999		6 County region	45-54	1	No	No	Male 45 thru 54	0.717294	1.2468	0.894324	0.730096	0.523693	1.43334	0.75063	1.51878	1.08941
1	71	Male	Knox County	No	No	No	No	Yes	No	Work part-time	Married	No	Yes	Very concerned	Very concerned	Very concerned	Extremely concerned	Health impacts of COVID-19	Bachelor's degree or higher	$75,000 - $99,999		6 County region	65+	1	No	No	Male 65+	1	1.7571	1.7571	0.730096	0.730096	1.31733	0.961778
1	61	Female	Shelby County	No	No	No	No	Yes	No	Work part-time	Divorced	Yes	No	Somewhat concerned	Not at all concerned	Not very concerned	Very concerned	Economic impacts of COVID-19	High school graduate or GED	Less than $15,000		6 County region	55-64	1	No	No	Female 55 thru 64	1	0.850711	0.850711	0.730096	0.730096	0.862899	0.629999
1	51	Female	Shelby County	No	No	No	No	Yes	No	Stay-at-Home Caregiver	Married	No	Yes	Somewhat concerned	Somewhat concerned	Somewhat concerned	Very concerned	Economic impacts of COVID-19	Bachelor's degree or higher	$100,000 - $149,999		6 County region	45-54	1	No	No	Female 45 thru 54	1	0.817142	0.817142	0.730096	0.730096	0.850522	0.620963
1	55	Male	Sullivan County	No	No	No	No	Yes	No	Retired	Divorced	No	Yes	Extremely concerned	Extremely concerned	Extremely concerned	Extremely concerned	Health impacts of COVID-19	High school graduate or GED	$25,000 - $34,999		6 County region	55-64	1	No	No	Male 55 thru 65	1	1.15827	1.15827	0.730096	0.730096	1.10949	0.810036
1	21	Male	Knox County	No	No	No	No	Yes	No	Student	Single	No	Yes	Not very concerned	Not very concerned	Somewhat concerned	Very concerned	Economic impacts of COVID-19	Some college or associate's degree	$150,000 or more		6 County region	18-24	1	No	No	Male 18 thru 24	1	1.23261	1.23261	0.730096	0.730096	1.24389	0.908157
1	72	Male	Davidson County	No	No	No	No	Yes	No	Retired	Divorced	No	No	Not very concerned	Not at all concerned	Not at all concerned	Extremely concerned	Economic impacts of COVID-19	Some college or associate's degree	$25,000 - $34,999		6 County region	65+	1	No	No	Male 65+	1	1.7571	1.7571	0.730096	0.730096	1.31733	0.961778
1	38	Male	Shelby County	No	No	No	No	Yes	No	Looking for work	Single	No	No	Extremely concerned	Extremely concerned	Extremely concerned	Extremely concerned	Health impacts of COVID-19	High school graduate or GED	$25,000 - $34,999		6 County region	35-44	1	No	No	Male 35 thru 44	1	1.00481	1.00481	0.730096	0.730096	0.954872	0.697148
1	32	Female	Madison County	No	No	No	No	Yes	No	Student	Married	Yes	No	Extremely concerned	Extremely concerned	Extremely concerned	Extremely concerned	Economic impacts of COVID-19	Some college or associate's degree	$25,000 - $34,999		6 County region	25-34	1	No	No	Female 25 thru 34	1	0.911825	0.911825	0.730096	0.730096	0.854477	0.62385
1	56	Male	Davidson County	No	No	No	No	Yes	No	Work full-time	Married	No	Yes	Not very concerned	Not very concerned	Not very concerned	Very concerned	Health impacts of COVID-19	Bachelor's degree or higher	$100,000 - $149,999		6 County region	55-64	1	No	No	Male 55 thru 65	1	1.15827	1.15827	0.730096	0.730096	1.10949	0.810036
1	35	Female	Knox County	No	Yes	No	No	No	No	Work full-time	Married	No	No	Somewhat concerned	Somewhat concerned	Somewhat concerned	Very concerned	Economic impacts of COVID-19	Bachelor's degree or higher	$150,000 or more		6 County region	35-44	1	Yes	No	Female 35 thru 44	1	0.763453	0.763453	0.730096	0.730096	0.802961	0.586239
1	70	Female	Sullivan County	No	No	No	No	No	Yes	Work full-time	Married	No	No	Not very concerned	Not at all concerned	Not at all concerned	Somewhat concerned	Economic impacts of COVID-19	Bachelor's degree or higher	$150,000 or more		6 County region	65+	1	Yes	No	Female 65+	1	1.01201	1.01201	0.730096	0.730096	1.05035	0.766853
1	34	Male	Knox County	No	No	No	No	Yes	No	Work full-time	Single	No	No	Somewhat concerned	Very concerned	Extremely concerned	Extremely concerned	Health impacts of COVID-19	High school graduate or GED	$35,000 - $49,999		6 County region	25-34	1	No	No	Male 25 thru 34	1	1.42702	1.42702	0.730096	0.730096	1.31307	0.958666
1	60	Female	Sullivan County	No	No	No	No	Yes	No	Work full-time	Living with someone	No	Yes	Somewhat concerned	Very concerned	Very concerned	Extremely concerned	Economic impacts of COVID-19	Bachelor's degree or higher	$100,000 - $149,999		6 County region	55-64	1	No	No	Female 55 thru 64	1	0.850711	0.850711	0.730096	0.730096	0.862899	0.629999
1	60	Male	Hamilton County	No	No	No	No	Yes	No	Work full-time	Divorced	No	Yes	Not at all concerned	Not very concerned	Not very concerned	Not at all concerned	Economic impacts of COVID-19	Some college or associate's degree	$150,000 or more		6 County region	55-64	1	No	No	Male 55 thru 65	1	1.15827	1.15827	0.730096	0.730096	1.10949	0.810036
1	45	Female	Davidson County	No	No	No	No	Yes	No	Work full-time	Divorced	No	Yes	Somewhat concerned	Very concerned	Very concerned	Very concerned	Economic impacts of COVID-19	Some college or associate's degree	$15,000 - $24,999		6 County region	45-54	1	No	No	Female 45 thru 54	1	0.817142	0.817142	0.730096	0.730096	0.850522	0.620963
1	54	Female	Sullivan County	No	No	No	No	Yes	No	Work full-time	Divorced	No	Yes	Very concerned	Somewhat concerned	Very concerned	Very concerned	Economic impacts of COVID-19	High school graduate or GED	$15,000 - $24,999		6 County region	45-54	1	No	No	Female 45 thru 54	1	0.817142	0.817142	0.730096	0.730096	0.850522	0.620963
1	57	Female	Hamilton County	No	No	No	No	Yes	No	Retired	Living with someone	No	Yes	Very concerned	Very concerned	Very concerned	Extremely concerned	Economic impacts of COVID-19	Some college or associate's degree	$35,000 - $49,999		6 County region	55-64	1	No	No	Female 55 thru 64	1	0.850711	0.850711	0.730096	0.730096	0.862899	0.629999
1	22	Female	Shelby County	No	No	No	Yes	No	No	Unemployed	Living with someone	No	Yes	Very concerned	Extremely concerned	Extremely concerned	Somewhat concerned	Economic impacts of COVID-19	High school graduate or GED	Less than $15,000		6 County region	18-24	1	Yes	No	Female 18 thru 24	1	0.654556	0.654556	0.730096	0.730096	0.698121	0.509695
1	19	Female	Davidson County	No	Yes	No	No	No	No	Student	Single	No	No	Very concerned	Very concerned	Very concerned	Very concerned	Economic impacts of COVID-19	Some college or associate's degree	$35,000 - $49,999		6 County region	18-24	1	Yes	No	Female 18 thru 24	1	0.654556	0.654556	0.730096	0.730096	0.698121	0.509695
1	20	Female	Shelby County	No	No	Yes	No	No	No	Student	Single	No	Yes	Very concerned	Somewhat concerned	Very concerned	Extremely concerned	Health impacts of COVID-19	Some college or associate's degree	$50,000 - $74,999		6 County region	18-24	1	No	No	Female 18 thru 24	0.717294	0.654556	0.469509	0.730096	0.523693	0.698121	0.365601	0.394655	0.283084
1	51	Female	Shelby County	No	No	No	No	Yes	No	Work full-time	Single	No	Yes	Extremely concerned	Extremely concerned	Extremely concerned	Extremely concerned	Health impacts of COVID-19	High school graduate or GED	$50,000 - $74,999		6 County region	45-54	1	No	No	Female 45 thru 54	1	0.817142	0.817142	0.730096	0.730096	0.850522	0.620963
1	63	Female	Knox County	No	No	No	No	Yes	No	Unemployed	Single	No	No	Not very concerned	Somewhat concerned	Not very concerned	Very concerned	Economic impacts of COVID-19	Bachelor's degree or higher	$15,000 - $24,999		6 County region	55-64	1	No	No	Female 55 thru 64	1	0.850711	0.850711	0.730096	0.730096	0.862899	0.629999
1	33	Female	Hamilton County	No	No	No	No	Yes	No	Work part-time	Married	No	No	Somewhat concerned	Not very concerned	Somewhat concerned	Very concerned	Economic impacts of COVID-19	Some college or associate's degree	$50,000 - $74,999		6 County region	25-34	1	No	No	Female 25 thru 34	1	0.911825	0.911825	0.730096	0.730096	0.854477	0.62385
1	40	Female	Hamilton County	No	No	No	No	Yes	No	Stay-at-Home Caregiver	Married	Yes	No	Extremely concerned	Extremely concerned	Extremely concerned	Extremely concerned	Health impacts of COVID-19	Some college or associate's degree	$50,000 - $74,999		6 County region	35-44	1	No	No	Female 35 thru 44	1	0.763453	0.763453	0.730096	0.730096	0.802961	0.586239
1	31	Male	Shelby County	No	Yes	No	No	No	No	Work full-time	Single	No	No	Not very concerned	Somewhat concerned	Somewhat concerned	Somewhat concerned	Health impacts of COVID-19	High school graduate or GED	$75,000 - $99,999		6 County region	25-34	1	Yes	No	Male 25 thru 34	1	1.42702	1.42702	0.730096	0.730096	1.31307	0.958666
1	67	Male	Sullivan County	No	No	No	No	Yes	No	Retired	Married	No	Yes	Very concerned	Very concerned	Very concerned	Very concerned	Health impacts of COVID-19	High school graduate or GED	$25,000 - $34,999		6 County region	65+	1	No	No	Male 65+	1	1.7571	1.7571	0.730096	0.730096	1.31733	0.961778
1	19	Female	Davidson County	No	No	No	Yes	Yes	No	Student	Single	No	Yes	Extremely concerned	Very concerned	Extremely concerned	Extremely concerned	Health impacts of COVID-19	Some college or associate's degree	$150,000 or more		6 County region	18-24	2	No	No	Female 18 thru 24	1	0.654556	0.654556	0.730096	0.730096	0.698121	0.509695
1	30	Female	Davidson County	No	No	No	No	Yes	No	Work full-time	Single	No	No	Not at all concerned	Not very concerned	Very concerned	Somewhat concerned	Economic impacts of COVID-19	Bachelor's degree or higher	$35,000 - $49,999		6 County region	25-34	1	No	No	Female 25 thru 34	1	0.911825	0.911825	0.730096	0.730096	0.854477	0.62385
1	65	Female	Shelby County	No	No	No	No	Yes	No	Work full-time	Divorced	No	Yes	Very concerned	Somewhat concerned	Somewhat concerned	Very concerned	Economic impacts of COVID-19	Bachelor's degree or higher	$75,000 - $99,999		6 County region	65+	1	No	No	Female 65+	1	1.01201	1.01201	0.730096	0.730096	1.05035	0.766853
1	46	Female	Shelby County	No	No	No	No	Yes	No	Work full-time	Single	No	No	Very concerned	Very concerned	Very concerned	Extremely concerned	Economic impacts of COVID-19	Bachelor's degree or higher	$25,000 - $34,999		6 County region	45-54	1	No	No	Female 45 thru 54	1	0.817142	0.817142	0.730096	0.730096	0.850522	0.620963
1	35	Female	Knox County	No	No	Yes	No	No	No	Work part-time	Dating	Yes	No	Extremely concerned	Extremely concerned	Extremely concerned	Extremely concerned	Health impacts of COVID-19	High school graduate or GED	Less than $15,000		6 County region	35-44	1	No	No	Female 35 thru 44	0.717294	0.763453	0.54762	0.730096	0.523693	0.802961	0.420505	0.733349	0.526027
1	19	Female	Shelby County	No	No	No	No	Yes	No	Work full-time	Separated	Yes	No	Not at all concerned	Not very concerned	Extremely concerned	Not very concerned	Health impacts of COVID-19	Some college or associate's degree	$15,000 - $24,999		6 County region	18-24	1	No	No	Female 18 thru 24	1	0.654556	0.654556	0.730096	0.730096	0.698121	0.509695
1	33	Female	Hamilton County	No	Yes	No	No	No	No	Stay-at-Home Caregiver	Married	Yes	No	Very concerned	Extremely concerned	Extremely concerned	Extremely concerned	Health impacts of COVID-19	Bachelor's degree or higher	Less than $15,000		6 County region	25-34	1	Yes	No	Female 25 thru 34	1	0.911825	0.911825	0.730096	0.730096	0.854477	0.62385
1	56	Female	Shelby County	No	No	No	No	Yes	No	Work full-time	Married	No	Yes	Not very concerned	Not very concerned	Not very concerned	Somewhat concerned	Economic impacts of COVID-19	High school graduate or GED	$100,000 - $149,999		6 County region	55-64	1	No	No	Female 55 thru 64	1	0.850711	0.850711	0.730096	0.730096	0.862899	0.629999
1	58	Male	Hamilton County	No	No	No	No	Yes	No	Unemployed	Single	No	No	Not at all concerned	Not very concerned	Not very concerned	Somewhat concerned	Economic impacts of COVID-19	Some college or associate's degree	$15,000 - $24,999		6 County region	55-64	1	No	No	Male 55 thru 65	1	1.15827	1.15827	0.730096	0.730096	1.10949	0.810036
1	49	Male	Davidson County	No	No	Yes	No	No	No	Work full-time	Married	Yes	No	Very concerned	Extremely concerned	Extremely concerned	Extremely concerned	Health impacts of COVID-19	High school graduate or GED	$75,000 - $99,999		6 County region	45-54	1	No	No	Male 45 thru 54	0.717294	1.2468	0.894324	0.730096	0.523693	1.43334	0.75063	1.51878	1.08941
1	70	Female	Shelby County	No	No	No	No	Yes	No	Retired	Divorced	No	No	Somewhat concerned	Somewhat concerned	Somewhat concerned	Very concerned	Health impacts of COVID-19	Bachelor's degree or higher	$35,000 - $49,999		6 County region	65+	1	No	No	Female 65+	1	1.01201	1.01201	0.730096	0.730096	1.05035	0.766853
1	40	Female	Sullivan County	No	No	No	No	Yes	No	Work full-time	Married	Yes	No	Not very concerned	Somewhat concerned	Very concerned	Very concerned	Economic impacts of COVID-19	Some college or associate's degree	$50,000 - $74,999		6 County region	35-44	1	No	No	Female 35 thru 44	1	0.763453	0.763453	0.730096	0.730096	0.802961	0.586239
1	51	Female	Shelby County	No	No	Yes	No	No	No	Work full-time	Single	No	Yes	Extremely concerned	Extremely concerned	Extremely concerned	Extremely concerned	Economic impacts of COVID-19	Some college or associate's degree	$35,000 - $49,999		6 County region	45-54	1	No	No	Female 45 thru 54	0.717294	0.817142	0.586131	0.730096	0.523693	0.850522	0.445413	0.900985	0.646271
1	27	Female	Hamilton County	No	No	No	Yes	Yes	No	Work full-time	Married	Yes	No	Very concerned	Extremely concerned	Extremely concerned	Extremely concerned	Health impacts of COVID-19	High school graduate or GED	$25,000 - $34,999		6 County region	25-34	2	No	No	Female 25 thru 34	1	0.911825	0.911825	0.730096	0.730096	0.854477	0.62385
1	39	Female	Davidson County	No	No	Yes	No	No	No	Work full-time	Married	Yes	No	Very concerned	Extremely concerned	Very concerned	Extremely concerned	Economic impacts of COVID-19	Some college or associate's degree	$100,000 - $149,999		6 County region	35-44	1	No	No	Female 35 thru 44	0.717294	0.763453	0.54762	0.730096	0.523693	0.802961	0.420505	0.733349	0.526027
1	61	Female	Sullivan County	No	No	No	No	Yes	No	Stay-at-Home Caregiver	Married	No	No	Extremely concerned	Extremely concerned	Extremely concerned	Very concerned	Health impacts of COVID-19	High school graduate or GED	$50,000 - $74,999		6 County region	55-64	1	No	No	Female 55 thru 64	1	0.850711	0.850711	0.730096	0.730096	0.862899	0.629999
1	46	Female	Knox County	No	No	No	No	Yes	No	Work full-time	Divorced	No	No	Not very concerned	Not very concerned	Somewhat concerned	Not very concerned	Health impacts of COVID-19	High school graduate or GED	Less than $15,000		6 County region	45-54	1	No	No	Female 45 thru 54	1	0.817142	0.817142	0.730096	0.730096	0.850522	0.620963
1	35	Male	Hamilton County	No	No	No	No	Yes	No	Work full-time	Dating	No	No	Not at all concerned	Not at all concerned	Somewhat concerned	Extremely concerned	Economic impacts of COVID-19	Some college or associate's degree	$75,000 - $99,999		6 County region	35-44	1	No	No	Male 35 thru 44	1	1.00481	1.00481	0.730096	0.730096	0.954872	0.697148
1	64	Female	Davidson County	No	No	No	No	Yes	No	Work full-time	Married	No	Yes	Somewhat concerned	Somewhat concerned	Somewhat concerned	Somewhat concerned	Health impacts of COVID-19	Bachelor's degree or higher	$50,000 - $74,999		6 County region	55-64	1	No	No	Female 55 thru 64	1	0.850711	0.850711	0.730096	0.730096	0.862899	0.629999
1	29	Female	Davidson County	No	No	No	No	Yes	No	Work full-time	Single	No	No	Not very concerned	Not very concerned	Somewhat concerned	Very concerned	Economic impacts of COVID-19	Bachelor's degree or higher	$35,000 - $49,999		6 County region	25-34	1	No	No	Female 25 thru 34	1	0.911825	0.911825	0.730096	0.730096	0.854477	0.62385
1	47	Female	Knox County	No	No	No	No	Yes	No	Looking for work	Single	No	No	Somewhat concerned	Extremely concerned	Extremely concerned	Very concerned	Health impacts of COVID-19	High school graduate or GED	Less than $15,000		6 County region	45-54	1	No	No	Female 45 thru 54	1	0.817142	0.817142	0.730096	0.730096	0.850522	0.620963
1	60	Female	Knox County	No	No	No	No	Yes	No	Work full-time	Married	No	Yes	Not very concerned	Not very concerned	Somewhat concerned	Somewhat concerned	Economic impacts of COVID-19	Bachelor's degree or higher	$75,000 - $99,999		6 County region	55-64	1	No	No	Female 55 thru 64	1	0.850711	0.850711	0.730096	0.730096	0.862899	0.629999
1	46	Male	Madison County	No	No	No	No	Yes	No	Work full-time	Married	Yes	No	Not very concerned	Somewhat concerned	Somewhat concerned	Very concerned	Health impacts of COVID-19	Some college or associate's degree	$75,000 - $99,999		6 County region	45-54	1	No	No	Male 45 thru 54	1	1.2468	1.2468	0.730096	0.730096	1.43334	1.04648
1	56	Male	Sullivan County	No	No	No	No	Yes	No	Work part-time	Single	No	Yes	Very concerned	Very concerned	Extremely concerned	Extremely concerned	Economic impacts of COVID-19	Some college or associate's degree	$15,000 - $24,999		6 County region	55-64	1	No	No	Male 55 thru 65	1	1.15827	1.15827	0.730096	0.730096	1.10949	0.810036
1	95	Female	Davidson County	No	No	No	Yes	No	No	Student	Single	No	No	Not very concerned	Somewhat concerned	Extremely concerned	Somewhat concerned	Economic impacts of COVID-19	Some college or associate's degree	$75,000 - $99,999		6 County region	65+	1	Yes	No	Female 65+	1	1.01201	1.01201	0.730096	0.730096	1.05035	0.766853
1	29	Female	Davidson County	No	No	No	No	Yes	No	Unemployed	Married	Yes	No	Somewhat concerned	Somewhat concerned	Very concerned	Very concerned	Economic impacts of COVID-19	High school graduate or GED	$25,000 - $34,999		6 County region	25-34	1	No	No	Female 25 thru 34	1	0.911825	0.911825	0.730096	0.730096	0.854477	0.62385
1	55	Female	Davidson County	No	No	No	No	Yes	No	Retired	Divorced	No	Yes	Not very concerned	Somewhat concerned	Not very concerned	Somewhat concerned	Economic impacts of COVID-19	Some college or associate's degree	$35,000 - $49,999		6 County region	55-64	1	No	No	Female 55 thru 64	1	0.850711	0.850711	0.730096	0.730096	0.862899	0.629999
1	44	Female	Knox County	No	No	No	No	Yes	No	Work full-time	Married	No	No	Not at all concerned	Not very concerned	Not very concerned	Extremely concerned	Economic impacts of COVID-19	High school graduate or GED	$35,000 - $49,999		6 County region	35-44	1	No	No	Female 35 thru 44	1	0.763453	0.763453	0.730096	0.730096	0.802961	0.586239
1	54	Female	Shelby County	No	No	Yes	No	No	No	Work full-time	Single	No	No	Somewhat concerned	Extremely concerned	Extremely concerned	Extremely concerned	Economic impacts of COVID-19	Bachelor's degree or higher	$50,000 - $74,999		6 County region	45-54	1	No	No	Female 45 thru 54	0.717294	0.817142	0.586131	0.730096	0.523693	0.850522	0.445413	0.900985	0.646271
1	22	Female	Shelby County	No	No	Yes	No	No	No	Student	Dating	No	No	Very concerned	Very concerned	Extremely concerned	Extremely concerned	Health impacts of COVID-19	Bachelor's degree or higher	$35,000 - $49,999		6 County region	18-24	1	No	No	Female 18 thru 24	0.717294	0.654556	0.469509	0.730096	0.523693	0.698121	0.365601	0.394655	0.283084
1	62	Female	Knox County	No	No	No	No	Yes	No	Retired	Divorced	No	Yes	Very concerned	Very concerned	Very concerned	Somewhat concerned	Economic impacts of COVID-19	High school graduate or GED	$25,000 - $34,999		6 County region	55-64	1	No	No	Female 55 thru 64	1	0.850711	0.850711	0.730096	0.730096	0.862899	0.629999
1	31	Female	Davidson County	No	No	No	No	Yes	No	Unemployed	Single	No	Yes	Not very concerned	Not very concerned	Somewhat concerned	Extremely concerned	Economic impacts of COVID-19	Bachelor's degree or higher	$75,000 - $99,999		6 County region	25-34	1	No	No	Female 25 thru 34	1	0.911825	0.911825	0.730096	0.730096	0.854477	0.62385
1	48	Female	Davidson County	No	No	No	No	Yes	No	Unemployed	Single	No	No	Very concerned	Very concerned	Very concerned	Very concerned	Health impacts of COVID-19	High school graduate or GED	$15,000 - $24,999		6 County region	45-54	1	No	No	Female 45 thru 54	1	0.817142	0.817142	0.730096	0.730096	0.850522	0.620963
1	64	Female	Davidson County	No	No	No	No	Yes	No	Work part-time	Divorced	No	Yes	Extremely concerned	Extremely concerned	Extremely concerned	Extremely concerned	Health impacts of COVID-19	Bachelor's degree or higher	$50,000 - $74,999		6 County region	55-64	1	No	No	Female 55 thru 64	1	0.850711	0.850711	0.730096	0.730096	0.862899	0.629999
1	26	Female	Sullivan County	No	No	No	No	Yes	No	Work full-time	Single	Yes	Yes	Somewhat concerned	Somewhat concerned	Very concerned	Extremely concerned	Economic impacts of COVID-19	Bachelor's degree or higher	$35,000 - $49,999		6 County region	25-34	1	No	No	Female 25 thru 34	1	0.911825	0.911825	0.730096	0.730096	0.854477	0.62385
1	19	Female	Davidson County	No	No	Yes	No	Yes	No	Student	Single	No	No	Not very concerned	Somewhat concerned	Extremely concerned	Extremely concerned	Economic impacts of COVID-19	High school graduate or GED	$15,000 - $24,999		6 County region	18-24	2	No	No	Female 18 thru 24	0.717294	0.654556	0.469509	0.730096	0.523693	0.698121	0.365601	0.394655	0.283084
1	30	Female	Sullivan County	No	No	No	No	Yes	No	Stay-at-Home Caregiver	Living with someone	Yes	Yes	Very concerned	Extremely concerned	Extremely concerned	Very concerned	Economic impacts of COVID-19	High school graduate or GED	$35,000 - $49,999		6 County region	25-34	1	No	No	Female 25 thru 34	1	0.911825	0.911825	0.730096	0.730096	0.854477	0.62385
1	31	Female	Sullivan County	No	No	No	No	Yes	No	Work full-time	Living with someone	Yes	Yes	Not very concerned	Not very concerned	Somewhat concerned	Extremely concerned	Economic impacts of COVID-19	Some college or associate's degree	Less than $15,000		6 County region	25-34	1	No	No	Female 25 thru 34	1	0.911825	0.911825	0.730096	0.730096	0.854477	0.62385
1	42	Female	Davidson County	No	No	Yes	No	No	No	Unemployed	Single	No	Yes	Somewhat concerned	Very concerned	Extremely concerned	Very concerned	Health impacts of COVID-19	Some college or associate's degree	$15,000 - $24,999		6 County region	35-44	1	No	No	Female 35 thru 44	0.717294	0.763453	0.54762	0.730096	0.523693	0.802961	0.420505	0.733349	0.526027
1	55	Male	Sullivan County	No	No	No	No	Yes	No	Retired	Married	No	Yes	Not at all concerned	Not at all concerned	Somewhat concerned	Not very concerned	Economic impacts of COVID-19	Bachelor's degree or higher	$100,000 - $149,999		6 County region	55-64	1	No	No	Male 55 thru 65	1	1.15827	1.15827	0.730096	0.730096	1.10949	0.810036
1	37	Male	Knox County	No	No	No	No	Yes	No	Unemployed	Single	No	No	Somewhat concerned	Very concerned	Extremely concerned	Extremely concerned	Health impacts of COVID-19	Less than high school graduate	Less than $15,000		6 County region	35-44	1	No	No	Male 35 thru 44	1	1.00481	1.00481	0.730096	0.730096	0.954872	0.697148
1	27	Female	Davidson County	No	No	No	No	Yes	No	Work part-time	Single	No	No	Not very concerned	Somewhat concerned	Very concerned	Extremely concerned	Health impacts of COVID-19	Bachelor's degree or higher	$50,000 - $74,999		6 County region	25-34	1	No	No	Female 25 thru 34	1	0.911825	0.911825	0.730096	0.730096	0.854477	0.62385
1	36	Female	Davidson County	No	No	No	No	Yes	No	Stay-at-Home Caregiver	Married	Yes	No	Somewhat concerned	Somewhat concerned	Very concerned	Very concerned	Economic impacts of COVID-19	Some college or associate's degree	$100,000 - $149,999		6 County region	35-44	1	No	No	Female 35 thru 44	1	0.763453	0.763453	0.730096	0.730096	0.802961	0.586239
1	66	Female	Davidson County	No	No	No	No	Yes	No	Work full-time	Divorced	No	Yes	Very concerned	Very concerned	Not very concerned	Extremely concerned	Economic impacts of COVID-19	Some college or associate's degree	$25,000 - $34,999		6 County region	65+	1	No	No	Female 65+	1	1.01201	1.01201	0.730096	0.730096	1.05035	0.766853
1	57	Female	Shelby County	No	No	No	No	Yes	No	Retired	Married	No	Yes	Very concerned	Very concerned	Very concerned	Very concerned	Health impacts of COVID-19	Bachelor's degree or higher	$35,000 - $49,999		6 County region	55-64	1	No	No	Female 55 thru 64	1	0.850711	0.850711	0.730096	0.730096	0.862899	0.629999
1	43	Female	Sullivan County	No	No	No	No	Yes	No	Stay-at-Home Caregiver	Married	Yes	No	Extremely concerned	Extremely concerned	Extremely concerned	Extremely concerned	Health impacts of COVID-19	Some college or associate's degree	$15,000 - $24,999		6 County region	35-44	1	No	No	Female 35 thru 44	1	0.763453	0.763453	0.730096	0.730096	0.802961	0.586239
1	64	Male	Davidson County	No	No	No	No	Yes	No	Retired	Single	No	Yes	Somewhat concerned	Not very concerned	Somewhat concerned	Extremely concerned	Health impacts of COVID-19	Bachelor's degree or higher	$75,000 - $99,999		6 County region	55-64	1	No	No	Male 55 thru 65	1	1.15827	1.15827	0.730096	0.730096	1.10949	0.810036
1	36	Male	Shelby County	No	No	No	No	Yes	No	Work full-time	Single	No	No	Not very concerned	Not very concerned	Extremely concerned	Not very concerned	Economic impacts of COVID-19	Bachelor's degree or higher	Less than $15,000		6 County region	35-44	1	No	No	Male 35 thru 44	1	1.00481	1.00481	0.730096	0.730096	0.954872	0.697148
1	37	Female	Shelby County	No	No	Yes	No	No	No	Stay-at-Home Caregiver	Dating	Yes	No	Very concerned	Very concerned	Very concerned	Very concerned	Economic impacts of COVID-19	Some college or associate's degree	$15,000 - $24,999		6 County region	35-44	1	No	No	Female 35 thru 44	0.717294	0.763453	0.54762	0.730096	0.523693	0.802961	0.420505	0.733349	0.526027
1	30	Female	Shelby County	No	Yes	No	No	No	No	Student	Single	No	No	Extremely concerned	Extremely concerned	Extremely concerned	Extremely concerned	Economic impacts of COVID-19	Bachelor's degree or higher	Less than $15,000		6 County region	25-34	1	Yes	No	Female 25 thru 34	1	0.911825	0.911825	0.730096	0.730096	0.854477	0.62385
1	45	Female	Hamilton County	No	No	No	No	Yes	No	Work part-time	Married	No	Yes	Somewhat concerned	Not very concerned	Extremely concerned	Very concerned	Health impacts of COVID-19	High school graduate or GED	$35,000 - $49,999		6 County region	45-54	1	No	No	Female 45 thru 54	1	0.817142	0.817142	0.730096	0.730096	0.850522	0.620963
1	56	Female	Hamilton County	No	No	No	No	Yes	No	Work full-time	Married	No	Yes	Extremely concerned	Extremely concerned	Extremely concerned	Very concerned	Health impacts of COVID-19	Some college or associate's degree	$25,000 - $34,999		6 County region	55-64	1	No	No	Female 55 thru 64	1	0.850711	0.850711	0.730096	0.730096	0.862899	0.629999
1	53	Male	Shelby County	No	No	No	No	Yes	No	Work full-time	Married	No	Yes	Somewhat concerned	Somewhat concerned	Somewhat concerned	Very concerned	Economic impacts of COVID-19	Some college or associate's degree	$50,000 - $74,999		6 County region	45-54	1	No	No	Male 45 thru 54	1	1.2468	1.2468	0.730096	0.730096	1.43334	1.04648
1	27	Male	Knox County	No	No	No	No	Yes	No	Work full-time	Married	No	No	Somewhat concerned	Somewhat concerned	Somewhat concerned	Somewhat concerned	Health impacts of COVID-19	Bachelor's degree or higher	$75,000 - $99,999		6 County region	25-34	1	No	No	Male 25 thru 34	1	1.42702	1.42702	0.730096	0.730096	1.31307	0.958666
1	51	Female	Hamilton County	No	No	Yes	No	No	No	Retired	Separated	No	No	Somewhat concerned	Somewhat concerned	Extremely concerned	Extremely concerned	Health impacts of COVID-19	Some college or associate's degree	$35,000 - $49,999		6 County region	45-54	1	No	No	Female 45 thru 54	0.717294	0.817142	0.586131	0.730096	0.523693	0.850522	0.445413	0.900985	0.646271
1	23	Female	Shelby County	No	No	No	No	Yes	No	Work full-time	Dating	No	No	Somewhat concerned	Very concerned	Somewhat concerned	Extremely concerned	Economic impacts of COVID-19	Bachelor's degree or higher	$35,000 - $49,999		6 County region	18-24	1	No	No	Female 18 thru 24	1	0.654556	0.654556	0.730096	0.730096	0.698121	0.509695
1	75	Female	Shelby County	No	No	No	No	Yes	No	Retired	Divorced	No	Yes	Somewhat concerned	Somewhat concerned	Somewhat concerned	Very concerned	Health impacts of COVID-19	Some college or associate's degree	$25,000 - $34,999		6 County region	65+	1	No	No	Female 65+	1	1.01201	1.01201	0.730096	0.730096	1.05035	0.766853
1	50	Female	Davidson County	No	No	No	No	Yes	No	Stay-at-Home Caregiver	Married	Yes	Yes	Somewhat concerned	Somewhat concerned	Somewhat concerned	Very concerned	Health impacts of COVID-19	Some college or associate's degree	$100,000 - $149,999		6 County region	45-54	1	No	No	Female 45 thru 54	1	0.817142	0.817142	0.730096	0.730096	0.850522	0.620963
1	34	Female	Knox County	No	No	No	No	Yes	No	Looking for work	Single	No	Yes	Somewhat concerned	Somewhat concerned	Somewhat concerned	Somewhat concerned	Health impacts of COVID-19	Some college or associate's degree	Less than $15,000		6 County region	25-34	1	No	No	Female 25 thru 34	1	0.911825	0.911825	0.730096	0.730096	0.854477	0.62385
1	43	Female	Hamilton County	No	No	No	No	Yes	No	Stay-at-Home Caregiver	Living with someone	No	No	Extremely concerned	Extremely concerned	Extremely concerned	Extremely concerned	Health impacts of COVID-19	High school graduate or GED	$15,000 - $24,999		6 County region	35-44	1	No	No	Female 35 thru 44	1	0.763453	0.763453	0.730096	0.730096	0.802961	0.586239
1	21	Female	Knox County	No	No	No	No	Yes	No	Work full-time	Married	Yes	No	Not very concerned	Not very concerned	Not very concerned	Very concerned	Economic impacts of COVID-19	Some college or associate's degree	$15,000 - $24,999		6 County region	18-24	1	No	No	Female 18 thru 24	1	0.654556	0.654556	0.730096	0.730096	0.698121	0.509695
1	40	Male	Shelby County	No	No	No	No	Yes	No	Work full-time	Married	Yes	No	Not very concerned	Not at all concerned	Not very concerned	Somewhat concerned	Economic impacts of COVID-19	Some college or associate's degree	$75,000 - $99,999		6 County region	35-44	1	No	No	Male 35 thru 44	1	1.00481	1.00481	0.730096	0.730096	0.954872	0.697148
1	67	Female	Hamilton County	No	No	No	No	Yes	No	Retired	Married	No	Yes	Very concerned	Very concerned	Extremely concerned	Extremely concerned	Economic impacts of COVID-19	Some college or associate's degree	$50,000 - $74,999		6 County region	65+	1	No	No	Female 65+	1	1.01201	1.01201	0.730096	0.730096	1.05035	0.766853
1	31	Female	Shelby County	No	No	No	No	Yes	No	Work full-time	Living with someone	Yes	No	Somewhat concerned	Somewhat concerned	Very concerned	Extremely concerned	Health impacts of COVID-19	High school graduate or GED	$35,000 - $49,999		6 County region	25-34	1	No	No	Female 25 thru 34	1	0.911825	0.911825	0.730096	0.730096	0.854477	0.62385
1	37	Female	Sullivan County	No	No	No	No	Yes	No	Work full-time	Married	Yes	No	Somewhat concerned	Not very concerned	Somewhat concerned	Very concerned	Economic impacts of COVID-19	Some college or associate's degree	$50,000 - $74,999		6 County region	35-44	1	No	No	Female 35 thru 44	1	0.763453	0.763453	0.730096	0.730096	0.802961	0.586239
1	40	Female	Knox County	No	No	No	No	Yes	No	Unemployed	Dating	No	No	Somewhat concerned	Extremely concerned	Very concerned	Very concerned	Economic impacts of COVID-19	Some college or associate's degree	Less than $15,000		6 County region	35-44	1	No	No	Female 35 thru 44	1	0.763453	0.763453	0.730096	0.730096	0.802961	0.586239
1	52	Female	Shelby County	No	No	Yes	No	No	No	Retired	Married	No	Yes	Extremely concerned	Extremely concerned	Extremely concerned	Extremely concerned	Health impacts of COVID-19	Some college or associate's degree	$35,000 - $49,999		6 County region	45-54	1	No	No	Female 45 thru 54	0.717294	0.817142	0.586131	0.730096	0.523693	0.850522	0.445413	0.900985	0.646271
1	49	Female	Hamilton County	No	Yes	No	No	No	No	Work full-time	Married	Yes	No	Extremely concerned	Not at all concerned	Extremely concerned	Extremely concerned	Economic impacts of COVID-19	Some college or associate's degree	$50,000 - $74,999		6 County region	45-54	1	Yes	No	Female 45 thru 54	1	0.817142	0.817142	0.730096	0.730096	0.850522	0.620963
1	39	Female	Shelby County	No	No	No	No	Yes	No	Work full-time	Married	Yes	Yes	Somewhat concerned	Very concerned	Very concerned	Extremely concerned	Economic impacts of COVID-19	Some college or associate's degree	$75,000 - $99,999		6 County region	35-44	1	No	No	Female 35 thru 44	1	0.763453	0.763453	0.730096	0.730096	0.802961	0.586239
1	57	Female	Knox County	No	No	No	No	Yes	No	Work full-time	Married	Yes	Yes	Very concerned	Extremely concerned	Very concerned	Extremely concerned	Economic impacts of COVID-19	Some college or associate's degree	$35,000 - $49,999		6 County region	55-64	1	No	No	Female 55 thru 64	1	0.850711	0.850711	0.730096	0.730096	0.862899	0.629999
1	29	Female	Shelby County	No	No	No	No	Yes	No	Work full-time	Married	No	No	Extremely concerned	Extremely concerned	Extremely concerned	Extremely concerned	Economic impacts of COVID-19	Bachelor's degree or higher	$75,000 - $99,999		6 County region	25-34	1	No	No	Female 25 thru 34	1	0.911825	0.911825	0.730096	0.730096	0.854477	0.62385
1	62	Female	Hamilton County	No	No	No	No	Yes	No	Unemployed	Single	No	No	Somewhat concerned	Somewhat concerned	Not very concerned	Somewhat concerned	Economic impacts of COVID-19	High school graduate or GED	$15,000 - $24,999		6 County region	55-64	1	No	No	Female 55 thru 64	1	0.850711	0.850711	0.730096	0.730096	0.862899	0.629999
1	65	Female	Davidson County	No	No	No	No	Yes	No	Retired	Married	No	Yes	Not very concerned	Somewhat concerned	Somewhat concerned	Very concerned	Health impacts of COVID-19	Bachelor's degree or higher	$75,000 - $99,999		6 County region	65+	1	No	No	Female 65+	1	1.01201	1.01201	0.730096	0.730096	1.05035	0.766853
1	70	Female	Knox County	No	No	No	No	Yes	No	Retired	Married	No	Yes	Not very concerned	Not very concerned	Not very concerned	Extremely concerned	Economic impacts of COVID-19	Bachelor's degree or higher	$75,000 - $99,999		6 County region	65+	1	No	No	Female 65+	1	1.01201	1.01201	0.730096	0.730096	1.05035	0.766853
1	59	Female	Shelby County	No	No	No	No	Yes	No	Unemployed	Single	No	Yes	Not very concerned	Not very concerned	Not very concerned	Somewhat concerned	Economic impacts of COVID-19	High school graduate or GED	Less than $15,000		6 County region	55-64	1	No	No	Female 55 thru 64	1	0.850711	0.850711	0.730096	0.730096	0.862899	0.629999
1	52	Female	Davidson County	No	Yes	No	No	No	No	Work full-time	Married	No	Yes	Somewhat concerned	Not at all concerned	Not at all concerned	Somewhat concerned	Economic impacts of COVID-19	Bachelor's degree or higher	$100,000 - $149,999		6 County region	45-54	1	Yes	No	Female 45 thru 54	1	0.817142	0.817142	0.730096	0.730096	0.850522	0.620963
1	28	Female	Davidson County	No	No	No	No	Yes	No	Work full-time	Married	No	No	Not very concerned	Not very concerned	Somewhat concerned	Very concerned	Economic impacts of COVID-19	Bachelor's degree or higher	$50,000 - $74,999		6 County region	25-34	1	No	No	Female 25 thru 34	1	0.911825	0.911825	0.730096	0.730096	0.854477	0.62385
1	23	Female	Knox County	No	No	No	No	Yes	No	Work part-time	Separated	Yes	Yes	Somewhat concerned	Not very concerned	Not very concerned	Somewhat concerned	Health impacts of COVID-19	Some college or associate's degree	$25,000 - $34,999		6 County region	18-24	1	No	No	Female 18 thru 24	1	0.654556	0.654556	0.730096	0.730096	0.698121	0.509695
1	56	Female	Sullivan County	No	No	No	No	Yes	No	Work full-time	Divorced	No	No	Extremely concerned	Extremely concerned	Extremely concerned	Extremely concerned	Health impacts of COVID-19	Bachelor's degree or higher	$100,000 - $149,999		6 County region	55-64	1	No	No	Female 55 thru 64	1	0.850711	0.850711	0.730096	0.730096	0.862899	0.629999
1	61	Female	Davidson County	No	No	No	Yes	No	No	Work part-time	Married	No	Yes	Somewhat concerned	Somewhat concerned	Very concerned	Somewhat concerned	Health impacts of COVID-19	Bachelor's degree or higher	$25,000 - $34,999		6 County region	55-64	1	Yes	No	Female 55 thru 64	1	0.850711	0.850711	0.730096	0.730096	0.862899	0.629999
1	65	Female	Hamilton County	No	No	No	No	Yes	No	Retired	Married	No	Yes	Not at all concerned	Not very concerned	Not at all concerned	Not very concerned	Economic impacts of COVID-19	Some college or associate's degree	$25,000 - $34,999		6 County region	65+	1	No	No	Female 65+	1	1.01201	1.01201	0.730096	0.730096	1.05035	0.766853
1	42	Female	Madison County	No	No	No	No	Yes	No	Stay-at-Home Caregiver	Living with someone	Yes	No	Extremely concerned	Extremely concerned	Extremely concerned	Extremely concerned	Health impacts of COVID-19	High school graduate or GED	$25,000 - $34,999		6 County region	35-44	1	No	No	Female 35 thru 44	1	0.763453	0.763453	0.730096	0.730096	0.802961	0.586239
1	63	Female	Davidson County	No	No	No	No	Yes	No	Work full-time	Married	No	Yes	Somewhat concerned	Very concerned	Extremely concerned	Extremely concerned	Health impacts of COVID-19	Some college or associate's degree	$75,000 - $99,999		6 County region	55-64	1	No	No	Female 55 thru 64	1	0.850711	0.850711	0.730096	0.730096	0.862899	0.629999
1	35	Female	Hamilton County	No	No	Yes	No	No	No	Work full-time	Single	Yes	No	Extremely concerned	Extremely concerned	Extremely concerned	Extremely concerned	Health impacts of COVID-19	Some college or associate's degree	$25,000 - $34,999		6 County region	35-44	1	No	No	Female 35 thru 44	0.717294	0.763453	0.54762	0.730096	0.523693	0.802961	0.420505	0.733349	0.526027
1	34	Female	Davidson County	No	No	No	No	No	No	Unemployed	Separated	No	No	Very concerned	Very concerned	Very concerned	Very concerned	Health impacts of COVID-19	Some college or associate's degree	Less than $15,000		6 County region	25-34	0	No	No	Female 25 thru 34	1	0.911825	0.911825	0.730096	0.730096	0.854477	0.62385
1	71	Female	Sullivan County	No	No	No	No	Yes	No	Retired	Married	No	Yes	Not very concerned	Somewhat concerned	Very concerned	Somewhat concerned	Health impacts of COVID-19	Some college or associate's degree	$25,000 - $34,999		6 County region	65+	1	No	No	Female 65+	1	1.01201	1.01201	0.730096	0.730096	1.05035	0.766853
1	50	Female	Knox County	No	No	No	No	Yes	No	Work full-time	Divorced	Yes	No	Somewhat concerned	Extremely concerned	Extremely concerned	Somewhat concerned	Health impacts of COVID-19	Some college or associate's degree	$50,000 - $74,999		6 County region	45-54	1	No	No	Female 45 thru 54	1	0.817142	0.817142	0.730096	0.730096	0.850522	0.620963
1	58	Male	Knox County	No	No	No	No	Yes	No	Unemployed	Single	No	Yes	Somewhat concerned	Somewhat concerned	Very concerned	Very concerned	Health impacts of COVID-19	Bachelor's degree or higher	$15,000 - $24,999		6 County region	55-64	1	No	No	Male 55 thru 65	1	1.15827	1.15827	0.730096	0.730096	1.10949	0.810036
1	60	Female	Sullivan County	No	No	No	No	Yes	No	Unemployed	Living with someone	No	Yes	Very concerned	Very concerned	Very concerned	Extremely concerned	Economic impacts of COVID-19	High school graduate or GED	$15,000 - $24,999		6 County region	55-64	1	No	No	Female 55 thru 64	1	0.850711	0.850711	0.730096	0.730096	0.862899	0.629999
1	41	Female	Hamilton County	No	No	No	No	Yes	No	Work part-time	Married	Yes	No	Not very concerned	Not very concerned	Somewhat concerned	Very concerned	Economic impacts of COVID-19	Bachelor's degree or higher	$50,000 - $74,999		6 County region	35-44	1	No	No	Female 35 thru 44	1	0.763453	0.763453	0.730096	0.730096	0.802961	0.586239
1	58	Female	Davidson County	No	No	No	No	Yes	No	Retired	Single	No	Yes	Somewhat concerned	Somewhat concerned	Somewhat concerned	Very concerned	Economic impacts of COVID-19	Bachelor's degree or higher	Less than $15,000		6 County region	55-64	1	No	No	Female 55 thru 64	1	0.850711	0.850711	0.730096	0.730096	0.862899	0.629999
1	41	Female	Shelby County	No	No	Yes	No	No	No	Unemployed	Living with someone	Yes	Yes	Somewhat concerned	Somewhat concerned	Somewhat concerned	Extremely concerned	Economic impacts of COVID-19	Less than high school graduate	$15,000 - $24,999		6 County region	35-44	1	No	No	Female 35 thru 44	0.717294	0.763453	0.54762	0.730096	0.523693	0.802961	0.420505	0.733349	0.526027
1	60	Female	Sullivan County	No	No	No	No	Yes	No	Retired	Single	No	No	Very concerned	Very concerned	Very concerned	Extremely concerned	Economic impacts of COVID-19	Some college or associate's degree	$50,000 - $74,999		6 County region	55-64	1	No	No	Female 55 thru 64	1	0.850711	0.850711	0.730096	0.730096	0.862899	0.629999
1	54	Male	Hamilton County	No	No	No	No	Yes	No	Work full-time	Married	No	Yes	Somewhat concerned	Somewhat concerned	Very concerned	Extremely concerned	Economic impacts of COVID-19	Some college or associate's degree	$75,000 - $99,999		6 County region	45-54	1	No	No	Male 45 thru 54	1	1.2468	1.2468	0.730096	0.730096	1.43334	1.04648
1	68	Female	Davidson County	No	No	No	No	Yes	No	Retired	Divorced	No	Yes	Not very concerned	Not very concerned	Not very concerned	Not very concerned	Economic impacts of COVID-19	Some college or associate's degree	$25,000 - $34,999		6 County region	65+	1	No	No	Female 65+	1	1.01201	1.01201	0.730096	0.730096	1.05035	0.766853
1	29	Male	Davidson County	No	No	No	No	Yes	No	Work full-time	Married	Yes	No	Not at all concerned	Not at all concerned	Not at all concerned	Somewhat concerned	Economic impacts of COVID-19	Bachelor's degree or higher	$75,000 - $99,999		6 County region	25-34	1	No	No	Male 25 thru 34	1	1.42702	1.42702	0.730096	0.730096	1.31307	0.958666
1	64	Male	Davidson County	No	No	No	No	Yes	No	Work full-time	Married	No	Yes	Very concerned	Very concerned	Very concerned	Extremely concerned	Health impacts of COVID-19	Some college or associate's degree	$50,000 - $74,999		6 County region	55-64	1	No	No	Male 55 thru 65	1	1.15827	1.15827	0.730096	0.730096	1.10949	0.810036
1	37	Male	Sullivan County	No	No	No	No	Yes	No	Work full-time	Living with someone	No	No	Somewhat concerned	Not very concerned	Somewhat concerned	Very concerned	Health impacts of COVID-19	Bachelor's degree or higher	$75,000 - $99,999		6 County region	35-44	1	No	No	Male 35 thru 44	1	1.00481	1.00481	0.730096	0.730096	0.954872	0.697148
1	71	Male	Davidson County	Yes	No	No	No	Yes	No	Work part-time	Divorced	No	Yes	Somewhat concerned	Somewhat concerned	Not very concerned	Extremely concerned	Health impacts of COVID-19	Bachelor's degree or higher	$25,000 - $34,999		6 County region	65+	2	No	No	Male 65+	1	1.7571	1.7571	0.730096	0.730096	1.31733	0.961778
1	30	Male	Knox County	No	No	No	No	Yes	No	Work full-time	Married	Yes	No	Somewhat concerned	Somewhat concerned	Extremely concerned	Extremely concerned	Health impacts of COVID-19	Bachelor's degree or higher	$100,000 - $149,999		6 County region	25-34	1	No	No	Male 25 thru 34	1	1.42702	1.42702	0.730096	0.730096	1.31307	0.958666
1	39	Female	Davidson County	No	No	No	No	Yes	No	Work full-time	Single	No	No	Somewhat concerned	Somewhat concerned	Somewhat concerned	Extremely concerned	Health impacts of COVID-19	Bachelor's degree or higher	$35,000 - $49,999		6 County region	35-44	1	No	No	Female 35 thru 44	1	0.763453	0.763453	0.730096	0.730096	0.802961	0.586239
1	47	Male	Hamilton County	No	No	No	No	Yes	No	Work full-time	Married	Yes	Yes	Somewhat concerned	Somewhat concerned	Not very concerned	Not very concerned	Economic impacts of COVID-19	Bachelor's degree or higher	$75,000 - $99,999		6 County region	45-54	1	No	No	Male 45 thru 54	1	1.2468	1.2468	0.730096	0.730096	1.43334	1.04648
1	49	Male	Hamilton County	No	No	No	No	Yes	No	Work full-time	Divorced	No	No	Somewhat concerned	Not very concerned	Not very concerned	Not very concerned	Economic impacts of COVID-19	Bachelor's degree or higher	$100,000 - $149,999		6 County region	45-54	1	No	No	Male 45 thru 54	1	1.2468	1.2468	0.730096	0.730096	1.43334	1.04648
1	57	Male	Davidson County	No	No	No	No	Yes	No	Work full-time	Married	No	Yes	Somewhat concerned	Not very concerned	Somewhat concerned	Somewhat concerned	Economic impacts of COVID-19	Some college or associate's degree	$50,000 - $74,999		6 County region	55-64	1	No	No	Male 55 thru 65	1	1.15827	1.15827	0.730096	0.730096	1.10949	0.810036
1	42	Female	Shelby County	No	No	Yes	No	No	No	Looking for work	Single	Yes	No	Very concerned	Extremely concerned	Extremely concerned	Not very concerned	Health impacts of COVID-19	Some college or associate's degree	Less than $15,000		6 County region	35-44	1	No	No	Female 35 thru 44	0.717294	0.763453	0.54762	0.730096	0.523693	0.802961	0.420505	0.733349	0.526027
1	57	Male	Madison County	No	No	No	No	Yes	No	Looking for work	Divorced	No	No	Very concerned	Very concerned	Extremely concerned	Very concerned	Health impacts of COVID-19	High school graduate or GED	Less than $15,000		6 County region	55-64	1	No	No	Male 55 thru 65	1	1.15827	1.15827	0.730096	0.730096	1.10949	0.810036
1	47	Female	Hamilton County	No	No	No	No	Yes	No	Unemployed	Separated	No	No	Very concerned	Very concerned	Extremely concerned	Very concerned	Health impacts of COVID-19	Some college or associate's degree	$25,000 - $34,999		6 County region	45-54	1	No	No	Female 45 thru 54	1	0.817142	0.817142	0.730096	0.730096	0.850522	0.620963
1	24	Female	Shelby County	No	No	Yes	No	No	No	Student	Separated	No	Yes	Not at all concerned	Not very concerned	Somewhat concerned	Somewhat concerned	Health impacts of COVID-19	Some college or associate's degree	$75,000 - $99,999		6 County region	18-24	1	No	No	Female 18 thru 24	0.717294	0.654556	0.469509	0.730096	0.523693	0.698121	0.365601	0.394655	0.283084
1	26	Female	Davidson County	No	No	No	No	Yes	No	Stay-at-Home Caregiver	Living with someone	Yes	No	Not at all concerned	Somewhat concerned	Somewhat concerned	Very concerned	Economic impacts of COVID-19	High school graduate or GED	$25,000 - $34,999		6 County region	25-34	1	No	No	Female 25 thru 34	1	0.911825	0.911825	0.730096	0.730096	0.854477	0.62385
1	24	Female	Hamilton County	No	No	No	No	Yes	No	Unemployed	Living with someone	No	No	Not very concerned	Somewhat concerned	Very concerned	Extremely concerned	Economic impacts of COVID-19	Some college or associate's degree	$50,000 - $74,999		6 County region	18-24	1	No	No	Female 18 thru 24	1	0.654556	0.654556	0.730096	0.730096	0.698121	0.509695
1	38	Female	Shelby County	No	No	No	No	Yes	No	Work full-time	Married	Yes	No	Not very concerned	Somewhat concerned	Very concerned	Very concerned	Health impacts of COVID-19	Some college or associate's degree	$75,000 - $99,999		6 County region	35-44	1	No	No	Female 35 thru 44	1	0.763453	0.763453	0.730096	0.730096	0.802961	0.586239
1	55	Male	Sullivan County	No	No	No	No	Yes	No	Unemployed	Divorced	Yes	Yes	Very concerned	Extremely concerned	Extremely concerned	Extremely concerned	Health impacts of COVID-19	Bachelor's degree or higher	$50,000 - $74,999		6 County region	55-64	1	No	No	Male 55 thru 65	1	1.15827	1.15827	0.730096	0.730096	1.10949	0.810036
1	33	Female	Knox County	No	No	No	No	Yes	No	Stay-at-Home Caregiver	Married	Yes	Yes	Not at all concerned	Not at all concerned	Not at all concerned	Extremely concerned	Economic impacts of COVID-19	High school graduate or GED	$25,000 - $34,999		6 County region	25-34	1	No	No	Female 25 thru 34	1	0.911825	0.911825	0.730096	0.730096	0.854477	0.62385
1	66	Male	Shelby County	No	No	No	No	Yes	No	Retired	Single	No	No	Very concerned	Extremely concerned	Very concerned	Extremely concerned	Health impacts of COVID-19	High school graduate or GED	Less than $15,000		6 County region	65+	1	No	No	Male 65+	1	1.7571	1.7571	0.730096	0.730096	1.31733	0.961778
1	26	Female	Hamilton County	No	No	No	No	Yes	No	Work full-time	Divorced	No	Yes	Somewhat concerned	Somewhat concerned	Somewhat concerned	Very concerned	Health impacts of COVID-19	Some college or associate's degree	$25,000 - $34,999		6 County region	25-34	1	No	No	Female 25 thru 34	1	0.911825	0.911825	0.730096	0.730096	0.854477	0.62385
1	65	Female	Hamilton County	No	No	No	No	Yes	No	Retired	Single	No	No	Very concerned	Very concerned	Very concerned	Very concerned	Economic impacts of COVID-19	Some college or associate's degree	$15,000 - $24,999		6 County region	65+	1	No	No	Female 65+	1	1.01201	1.01201	0.730096	0.730096	1.05035	0.766853
1	77	Male	Sullivan County	No	No	No	No	Yes	No	Retired	Married	No	Yes	Not very concerned	Somewhat concerned	Very concerned	Very concerned	Health impacts of COVID-19	Some college or associate's degree	$50,000 - $74,999		6 County region	65+	1	No	No	Male 65+	1	1.7571	1.7571	0.730096	0.730096	1.31733	0.961778
1	22	Female	Davidson County	No	No	No	No	Yes	No	Work full-time	Living with someone	No	No	Somewhat concerned	Somewhat concerned	Very concerned	Very concerned	Health impacts of COVID-19	Bachelor's degree or higher	$25,000 - $34,999		6 County region	18-24	1	No	No	Female 18 thru 24	1	0.654556	0.654556	0.730096	0.730096	0.698121	0.509695
1	42	Female	Shelby County	No	No	No	Yes	No	No	Work full-time	Married	No	No	Extremely concerned	Extremely concerned	Extremely concerned	Extremely concerned	Health impacts of COVID-19	Less than high school graduate	$50,000 - $74,999		6 County region	35-44	1	Yes	No	Female 35 thru 44	1	0.763453	0.763453	0.730096	0.730096	0.802961	0.586239
1	20	Male	Knox County	No	No	No	No	Yes	No	Student	Divorced	No	No	Somewhat concerned	Somewhat concerned	Somewhat concerned	Somewhat concerned	Health impacts of COVID-19	Bachelor's degree or higher	Less than $15,000		6 County region	18-24	1	No	No	Male 18 thru 24	1	1.23261	1.23261	0.730096	0.730096	1.24389	0.908157
1	70	Female	Hamilton County	No	No	Yes	No	No	No	Retired	Divorced	No	Yes	Somewhat concerned	Very concerned	Very concerned	Very concerned	Health impacts of COVID-19	Bachelor's degree or higher	$50,000 - $74,999		6 County region	65+	1	No	No	Female 65+	0.717294	1.01201	0.72591	0.730096	0.523693	1.05035	0.550059	1.47113	1.05523
1	65	Female	Shelby County	No	No	Yes	No	No	No	Retired	Single	No	No	Not very concerned	Not very concerned	Somewhat concerned	Somewhat concerned	Health impacts of COVID-19	Some college or associate's degree	$35,000 - $49,999		6 County region	65+	1	No	No	Female 65+	0.717294	1.01201	0.72591	0.730096	0.523693	1.05035	0.550059	1.47113	1.05523
1	29	Female	Sullivan County	No	No	No	No	Yes	No	Work part-time	Single	Yes	No	Not very concerned	Somewhat concerned	Not very concerned	Somewhat concerned	Health impacts of COVID-19	Some college or associate's degree	Less than $15,000		6 County region	25-34	1	No	No	Female 25 thru 34	1	0.911825	0.911825	0.730096	0.730096	0.854477	0.62385
1	59	Male	Knox County	No	No	No	No	Yes	No	Retired	Married	No	Yes	Extremely concerned	Extremely concerned	Extremely concerned	Extremely concerned	Health impacts of COVID-19	Bachelor's degree or higher	$50,000 - $74,999		6 County region	55-64	1	No	No	Male 55 thru 65	1	1.15827	1.15827	0.730096	0.730096	1.10949	0.810036
1	69	Male	Hamilton County	No	No	No	No	Yes	No	Retired	Married	No	Yes	Very concerned	Somewhat concerned	Very concerned		Economic impacts of COVID-19	Bachelor's degree or higher	$50,000 - $74,999		6 County region	65+	1	No	No	Male 65+	1	1.7571	1.7571	0.730096	0.730096	1.31733	0.961778
1	31	Male	Hamilton County	No	No	Yes	No	No	No	Work full-time	Single	Yes	No	Very concerned	Very concerned	Somewhat concerned	Very concerned	Economic impacts of COVID-19	High school graduate or GED	$50,000 - $74,999		6 County region	25-34	1	No	No	Male 25 thru 34	0.717294	1.42702	1.02359	0.730096	0.523693	1.31307	0.687645	1.15163	0.826056
1	44	Male	Sullivan County	No	No	No	No	Yes	No	Work part-time	Separated	Yes	Yes	Somewhat concerned	Somewhat concerned	Extremely concerned	Extremely concerned	Economic impacts of COVID-19	High school graduate or GED	Less than $15,000		6 County region	35-44	1	No	No	Male 35 thru 44	1	1.00481	1.00481	0.730096	0.730096	0.954872	0.697148
1	55	Male	Davidson County	No	Yes	No	No	No	No	Work full-time	Married	No	Yes	Very concerned	Somewhat concerned	Very concerned	Very concerned	Health impacts of COVID-19	Bachelor's degree or higher	$100,000 - $149,999		6 County region	55-64	1	Yes	No	Male 55 thru 65	1	1.15827	1.15827	0.730096	0.730096	1.10949	0.810036
1	22	Male	Shelby County	No	No	Yes	No	No	No	Unemployed	Separated	No	No	Very concerned	Extremely concerned	Extremely concerned	Extremely concerned	Health impacts of COVID-19	Some college or associate's degree	$15,000 - $24,999		6 County region	18-24	1	No	No	Male 18 thru 24	0.717294	1.23261	0.884145	0.730096	0.523693	1.24389	0.651415	0.8773	0.629282
1	45	Male	Knox County	No	No	No	No	Yes	No	Work full-time	Married	Yes	Yes	Somewhat concerned	Not at all concerned	Very concerned	Not very concerned	Health impacts of COVID-19	Some college or associate's degree	$25,000 - $34,999		6 County region	45-54	1	No	No	Male 45 thru 54	1	1.2468	1.2468	0.730096	0.730096	1.43334	1.04648
1	29	Male	Shelby County	No	No	No	No	Yes	No	Work full-time	Single	No	No	Not very concerned	Not at all concerned	Not at all concerned	Not at all concerned	Health impacts of COVID-19	Bachelor's degree or higher	$50,000 - $74,999		6 County region	25-34	1	No	No	Male 25 thru 34	1	1.42702	1.42702	0.730096	0.730096	1.31307	0.958666
1	35	Male	Shelby County	No	No	No	No	Yes	No	Work full-time	Married	Yes	No	Extremely concerned	Very concerned	Very concerned	Extremely concerned	Health impacts of COVID-19	Bachelor's degree or higher	$75,000 - $99,999		6 County region	35-44	1	No	No	Male 35 thru 44	1	1.00481	1.00481	0.730096	0.730096	0.954872	0.697148
1	18	Male	Davidson County	No	No	No	No	Yes	No	Student	Single	No	Yes	Somewhat concerned	Very concerned	Very concerned	Very concerned	Economic impacts of COVID-19	Less than high school graduate	$50,000 - $74,999		6 County region	18-24	1	No	No	Male 18 thru 24	1	1.23261	1.23261	0.730096	0.730096	1.24389	0.908157
1	41	Male	Shelby County	No	No	No	No	Yes	No	Work full-time	Married	No	No	Somewhat concerned	Somewhat concerned	Extremely concerned	Extremely concerned	Health impacts of COVID-19	Some college or associate's degree	$35,000 - $49,999		6 County region	35-44	1	No	No	Male 35 thru 44	1	1.00481	1.00481	0.730096	0.730096	0.954872	0.697148
1	66	Male	Shelby County	No	No	No	No	Yes	No	Work full-time	Divorced	No	Yes	Very concerned	Not very concerned	Not at all concerned	Extremely concerned	Economic impacts of COVID-19	Bachelor's degree or higher	$15,000 - $24,999		6 County region	65+	1	No	No	Male 65+	1	1.7571	1.7571	0.730096	0.730096	1.31733	0.961778
1	56	Male	Shelby County	No	No	No	No	Yes	No	Unemployed	Married	No	Yes	Very concerned	Very concerned	Extremely concerned	Extremely concerned	Economic impacts of COVID-19	Bachelor's degree or higher	$15,000 - $24,999		6 County region	55-64	1	No	No	Male 55 thru 65	1	1.15827	1.15827	0.730096	0.730096	1.10949	0.810036
1	19	Male	Davidson County	No	No	No	No	Yes	No	Student	Divorced	No	Yes	Somewhat concerned	Somewhat concerned	Somewhat concerned	Somewhat concerned	Economic impacts of COVID-19	High school graduate or GED	Less than $15,000		6 County region	18-24	1	No	No	Male 18 thru 24	1	1.23261	1.23261	0.730096	0.730096	1.24389	0.908157
1	18	Female	Shelby County	No	No	No	No	Yes	No	Student	Single	Yes	No	Somewhat concerned	Extremely concerned	Extremely concerned	Extremely concerned	Health impacts of COVID-19	High school graduate or GED	$150,000 or more		6 County region	18-24	1	No	No	Female 18 thru 24	1	0.654556	0.654556	0.730096	0.730096	0.698121	0.509695
1	50	Male	Hamilton County	No	No	Yes	No	No	No	Work full-time	Married	No	No	Very concerned	Not at all concerned	Not at all concerned	Not at all concerned	Health impacts of COVID-19	Some college or associate's degree	$75,000 - $99,999		6 County region	45-54	1	No	No	Male 45 thru 54	0.717294	1.2468	0.894324	0.730096	0.523693	1.43334	0.75063	1.51878	1.08941
1	35	Male	Shelby County	No	No	Yes	Yes	No	No	Work full-time	Separated	No	Yes	Very concerned	Not at all concerned	Extremely concerned	Extremely concerned	Health impacts of COVID-19	Some college or associate's degree	$25,000 - $34,999		6 County region	35-44	2	No	No	Male 35 thru 44	0.717294	1.00481	0.720747	0.730096	0.523693	0.954872	0.50006	1.07527	0.771287
1	51	Male	Hamilton County	No	No	No	No	Yes	No	Unemployed	Single	No	Yes	Not at all concerned	Not very concerned	Very concerned	Somewhat concerned	Economic impacts of COVID-19	High school graduate or GED	Less than $15,000		6 County region	45-54	1	No	No	Male 45 thru 54	1	1.2468	1.2468	0.730096	0.730096	1.43334	1.04648
1	54	Male	Knox County	No	No	No	No	Yes	No	Retired	Married	No	Yes	Very concerned	Extremely concerned	Very concerned	Extremely concerned	Health impacts of COVID-19	Some college or associate's degree	$75,000 - $99,999		6 County region	45-54	1	No	No	Male 45 thru 54	1	1.2468	1.2468	0.730096	0.730096	1.43334	1.04648
1	24	Male	Sullivan County	No	No	No	No	Yes	No	Unemployed	Single	No	Yes	Somewhat concerned	Extremely concerned	Extremely concerned	Somewhat concerned	Economic impacts of COVID-19	High school graduate or GED	Less than $15,000		6 County region	18-24	1	No	No	Male 18 thru 24	1	1.23261	1.23261	0.730096	0.730096	1.24389	0.908157
1	37	Male	Shelby County	No	No	Yes	No	No	No	Work full-time	Married	Yes	No	Somewhat concerned	Very concerned	Extremely concerned	Extremely concerned	Health impacts of COVID-19	Bachelor's degree or higher	$100,000 - $149,999		6 County region	35-44	1	No	No	Male 35 thru 44	0.717294	1.00481	0.720747	0.730096	0.523693	0.954872	0.50006	1.07527	0.771287
1	24	Male	Davidson County	No	No	No	No	Yes	No	Student	Single	No	No	Not very concerned	Extremely concerned	Very concerned	Extremely concerned	Health impacts of COVID-19	Bachelor's degree or higher	$35,000 - $49,999		6 County region	18-24	1	No	No	Male 18 thru 24	1	1.23261	1.23261	0.730096	0.730096	1.24389	0.908157
1	48	Female	Knox County	No	No	No	No	Yes	No	Work part-time	Married	Yes	Yes	Extremely concerned	Extremely concerned	Extremely concerned	Extremely concerned	Health impacts of COVID-19	Some college or associate's degree	$35,000 - $49,999		6 County region	45-54	1	No	No	Female 45 thru 54	1	0.817142	0.817142	0.730096	0.730096	0.850522	0.620963
1	18	Female	Shelby County	No	No	Yes	No	No	No	Student	Single	Yes	No	Somewhat concerned	Somewhat concerned	Somewhat concerned	Not very concerned	Economic impacts of COVID-19	High school graduate or GED	$15,000 - $24,999		6 County region	18-24	1	No	No	Female 18 thru 24	0.717294	0.654556	0.469509	0.730096	0.523693	0.698121	0.365601	0.394655	0.283084
1	66	Male	Knox County	No	No	No	No	Yes	No	Retired	Married	No	Yes	Not at all concerned	Not at all concerned	Not very concerned	Somewhat concerned	Economic impacts of COVID-19	Bachelor's degree or higher	$75,000 - $99,999		6 County region	65+	1	No	No	Male 65+	1	1.7571	1.7571	0.730096	0.730096	1.31733	0.961778
1	42	Female	Shelby County	No	No	Yes	No	No	No	Work part-time	Single	No	No	Somewhat concerned	Somewhat concerned	Somewhat concerned	Somewhat concerned	Health impacts of COVID-19	Some college or associate's degree	$15,000 - $24,999		6 County region	35-44	1	No	No	Female 35 thru 44	0.717294	0.763453	0.54762	0.730096	0.523693	0.802961	0.420505	0.733349	0.526027
1	20	Male	Davidson County	No	No	No	No	Yes	No	Unemployed	Married	Yes	No	Not at all concerned	Not at all concerned	Not very concerned	Somewhat concerned	Economic impacts of COVID-19	Bachelor's degree or higher	$100,000 - $149,999		6 County region	18-24	1	No	No	Male 18 thru 24	1	1.23261	1.23261	0.730096	0.730096	1.24389	0.908157
1	56	Male	Shelby County	No	No	No	No	Yes	No	Unemployed	Married	No	Yes	Very concerned	Very concerned	Very concerned	Extremely concerned	Economic impacts of COVID-19	Bachelor's degree or higher	$15,000 - $24,999		6 County region	55-64	1	No	No	Male 55 thru 65	1	1.15827	1.15827	0.730096	0.730096	1.10949	0.810036
1	35	Female	Madison County	No	No	No	No	Yes	No	Unemployed	Single	Yes	No	Not at all concerned	Not at all concerned	Not at all concerned	Not very concerned	Economic impacts of COVID-19	High school graduate or GED	Less than $15,000		6 County region	35-44	1	No	No	Female 35 thru 44	1	0.763453	0.763453	0.730096	0.730096	0.802961	0.586239
1	54	Female	Knox County	No	No	No	No	Yes	No	Stay-at-Home Caregiver	Married	No	Yes	Not very concerned	Not very concerned	Not very concerned	Somewhat concerned	Economic impacts of COVID-19	Bachelor's degree or higher	$150,000 or more		6 County region	45-54	1	No	No	Female 45 thru 54	1	0.817142	0.817142	0.730096	0.730096	0.850522	0.620963
1	91	Female	Knox County	No	No	No	No	Yes	No	Retired	Single	No	Yes	Extremely concerned	Very concerned	Extremely concerned	Extremely concerned	Health impacts of COVID-19	High school graduate or GED	$75,000 - $99,999		6 County region	65+	1	No	No	Female 65+	1	1.01201	1.01201	0.730096	0.730096	1.05035	0.766853
1	26	Male	Shelby County	No	No	No	No	Yes	No	Work full-time	Married	No	No	Somewhat concerned	Somewhat concerned	Very concerned	Very concerned	Economic impacts of COVID-19	High school graduate or GED	$100,000 - $149,999		6 County region	25-34	1	No	No	Male 25 thru 34	1	1.42702	1.42702	0.730096	0.730096	1.31307	0.958666
1	52	Female	Knox County	No	No	No	No	Yes	No	Work full-time	Single	No	No	Not very concerned	Not very concerned	Somewhat concerned	Very concerned	Economic impacts of COVID-19	Bachelor's degree or higher	$35,000 - $49,999		6 County region	45-54	1	No	No	Female 45 thru 54	1	0.817142	0.817142	0.730096	0.730096	0.850522	0.620963
1	18	Female	Knox County	No	No	No	No	Yes	No	Student	Single	Yes	No	Not at all concerned	Not at all concerned	Not very concerned	Very concerned	Economic impacts of COVID-19	Less than high school graduate	$100,000 - $149,999		6 County region	18-24	1	No	No	Female 18 thru 24	1	0.654556	0.654556	0.730096	0.730096	0.698121	0.509695
1	20	Male	Shelby County	No	No	No	No	Yes	No	Work full-time	Dating	No	No	Very concerned	Not at all concerned	Extremely concerned	Extremely concerned	Economic impacts of COVID-19	Bachelor's degree or higher	$75,000 - $99,999		6 County region	18-24	1	No	No	Male 18 thru 24	1	1.23261	1.23261	0.730096	0.730096	1.24389	0.908157
1	40	Female	Knox County	No	No	No	No	Yes	No	Stay-at-Home Caregiver	Single	No	Yes	Somewhat concerned	Somewhat concerned	Somewhat concerned	Somewhat concerned	Economic impacts of COVID-19	Some college or associate's degree	$25,000 - $34,999		6 County region	35-44	1	No	No	Female 35 thru 44	1	0.763453	0.763453	0.730096	0.730096	0.802961	0.586239
1	32	Male	Shelby County	No	No	Yes	No	No	No	Work full-time	Living with someone	No	No	Extremely concerned	Extremely concerned	Extremely concerned	Extremely concerned	Health impacts of COVID-19	High school graduate or GED	$35,000 - $49,999		6 County region	25-34	1	No	No	Male 25 thru 34	0.717294	1.42702	1.02359	0.730096	0.523693	1.31307	0.687645	1.15163	0.826056
1	22	Female	Shelby County	No	No	Yes	No	No	No	Unemployed	Living with someone	Yes	No	Not very concerned	Not very concerned	Somewhat concerned	Somewhat concerned	Economic impacts of COVID-19	Bachelor's degree or higher	$25,000 - $34,999		6 County region	18-24	1	No	No	Female 18 thru 24	0.717294	0.654556	0.469509	0.730096	0.523693	0.698121	0.365601	0.394655	0.283084
1	33	Male	Davidson County	No	No	No	No	Yes	No	Work full-time	Married	Yes	No	Not very concerned	Not very concerned	Somewhat concerned	Very concerned	Economic impacts of COVID-19	Some college or associate's degree	$100,000 - $149,999		6 County region	25-34	1	No	No	Male 25 thru 34	1	1.42702	1.42702	0.730096	0.730096	1.31307	0.958666
1	72	Female	Sullivan County	No	No	No	No	Yes	No	Retired	Married	No	Yes	Not very concerned	Not very concerned	Not very concerned	Somewhat concerned	Economic impacts of COVID-19	Bachelor's degree or higher	$35,000 - $49,999		6 County region	65+	1	No	No	Female 65+	1	1.01201	1.01201	0.730096	0.730096	1.05035	0.766853
1	39	Female	Shelby County	No	No	No	No	Yes	No	Unemployed	Single	No	No	Very concerned	Somewhat concerned	Very concerned	Very concerned	Health impacts of COVID-19	Bachelor's degree or higher	$25,000 - $34,999		6 County region	35-44	1	No	No	Female 35 thru 44	1	0.763453	0.763453	0.730096	0.730096	0.802961	0.586239
1	24	Male	Shelby County	No	No	No	Yes	No	No	Work part-time	Single	No	No	Somewhat concerned	Very concerned	Somewhat concerned	Somewhat concerned	Health impacts of COVID-19	High school graduate or GED	$25,000 - $34,999		6 County region	18-24	1	Yes	No	Male 18 thru 24	1	1.23261	1.23261	0.730096	0.730096	1.24389	0.908157
1	25	Male	Davidson County	No	No	No	No	Yes	No	Unemployed	Single	No	No	Very concerned	Very concerned	Extremely concerned	Somewhat concerned	Economic impacts of COVID-19	High school graduate or GED	$15,000 - $24,999		6 County region	25-34	1	No	No	Male 25 thru 34	1	1.42702	1.42702	0.730096	0.730096	1.31307	0.958666
1	70	Female	Davidson County	No	No	No	No	Yes	No	Retired	Divorced	No	Yes	Not very concerned	Not very concerned	Not very concerned	Very concerned	Economic impacts of COVID-19	High school graduate or GED	$15,000 - $24,999		6 County region	65+	1	No	No	Female 65+	1	1.01201	1.01201	0.730096	0.730096	1.05035	0.766853
1	67	Female	Knox County	No	No	Yes	No	No	No	Retired	Divorced	No	Yes	Not very concerned	Somewhat concerned	Somewhat concerned	Extremely concerned	Economic impacts of COVID-19	Some college or associate's degree	Less than $15,000		6 County region	65+	1	No	No	Female 65+	0.717294	1.01201	0.72591	0.730096	0.523693	1.05035	0.550059	1.47113	1.05523
1	69	Male	Madison County	No	No	No	No	Yes	No	Work full-time	Divorced	No	No	Very concerned	Very concerned	Very concerned	Very concerned	Health impacts of COVID-19	Bachelor's degree or higher	$100,000 - $149,999		6 County region	65+	1	No	No	Male 65+	1	1.7571	1.7571	0.730096	0.730096	1.31733	0.961778
1	32	Female	Knox County	No	No	No	No	Yes	No	Work full-time	Single	No	No	Not very concerned	Not very concerned	Somewhat concerned	Very concerned	Economic impacts of COVID-19	Bachelor's degree or higher	$25,000 - $34,999		6 County region	25-34	1	No	No	Female 25 thru 34	1	0.911825	0.911825	0.730096	0.730096	0.854477	0.62385
1	38	Female	Knox County	No	No	No	No	Yes	No	Work full-time	Living with someone	No	No	Somewhat concerned	Very concerned	Very concerned	Somewhat concerned	Economic impacts of COVID-19	High school graduate or GED	$35,000 - $49,999		6 County region	35-44	1	No	No	Female 35 thru 44	1	0.763453	0.763453	0.730096	0.730096	0.802961	0.586239
1	68	Female	Sullivan County	No	No	No	No	Yes	No	Work full-time	Married	No	Yes	Somewhat concerned	Somewhat concerned	Very concerned	Extremely concerned	Economic impacts of COVID-19	Some college or associate's degree	$35,000 - $49,999		6 County region	65+	1	No	No	Female 65+	1	1.01201	1.01201	0.730096	0.730096	1.05035	0.766853
1	45	Female	Shelby County	No	No	Yes	No	No	No	Work full-time	Married	Yes	Yes	Somewhat concerned	Extremely concerned	Extremely concerned	Very concerned	Health impacts of COVID-19	High school graduate or GED	$150,000 or more		6 County region	45-54	1	No	No	Female 45 thru 54	0.717294	0.817142	0.586131	0.730096	0.523693	0.850522	0.445413	0.900985	0.646271
1	65	Female	Davidson County	No	No	No	No	Yes	No	Retired	Married	No	Yes	Not very concerned	Somewhat concerned	Somewhat concerned	Somewhat concerned	Economic impacts of COVID-19	Some college or associate's degree	$50,000 - $74,999		6 County region	65+	1	No	No	Female 65+	1	1.01201	1.01201	0.730096	0.730096	1.05035	0.766853
1	39	Female	Hamilton County	No	No	No	No	Yes	No	Stay-at-Home Caregiver	Married	Yes	No	Not very concerned	Somewhat concerned	Somewhat concerned	Very concerned	Economic impacts of COVID-19	Bachelor's degree or higher	$100,000 - $149,999		6 County region	35-44	1	No	No	Female 35 thru 44	1	0.763453	0.763453	0.730096	0.730096	0.802961	0.586239
1	49	Female	Shelby County	No	No	No	No	Yes	No	Work full-time	Divorced	Yes	No	Somewhat concerned	Somewhat concerned	Somewhat concerned	Somewhat concerned	Economic impacts of COVID-19	Bachelor's degree or higher	$50,000 - $74,999		6 County region	45-54	1	No	No	Female 45 thru 54	1	0.817142	0.817142	0.730096	0.730096	0.850522	0.620963
1	35	Female	Hamilton County	No	No	No	No	Yes	No	Work full-time	Dating	No	No	Not very concerned	Not very concerned	Very concerned	Very concerned	Health impacts of COVID-19	Bachelor's degree or higher	$35,000 - $49,999		6 County region	35-44	1	No	No	Female 35 thru 44	1	0.763453	0.763453	0.730096	0.730096	0.802961	0.586239
1	48	Female	Sullivan County	No	No	No	No	Yes	No	Unemployed	Divorced	No	No	Very concerned	Somewhat concerned	Very concerned	Very concerned	Economic impacts of COVID-19	High school graduate or GED	Less than $15,000		6 County region	45-54	1	No	No	Female 45 thru 54	1	0.817142	0.817142	0.730096	0.730096	0.850522	0.620963
1	24	Male	Shelby County	No	No	Yes	No	No	No	Work full-time	Single	Yes	No	Somewhat concerned	Very concerned	Very concerned	Very concerned	Economic impacts of COVID-19	High school graduate or GED	$75,000 - $99,999		6 County region	18-24	1	No	No	Male 18 thru 24	0.717294	1.23261	0.884145	0.730096	0.523693	1.24389	0.651415	0.8773	0.629282
1	26	Female	Davidson County	No	No	No	No	Yes	No	Looking for work	Dating	Yes	No	Very concerned	Very concerned	Somewhat concerned	Not very concerned	Economic impacts of COVID-19	High school graduate or GED	Less than $15,000		6 County region	25-34	1	No	No	Female 25 thru 34	1	0.911825	0.911825	0.730096	0.730096	0.854477	0.62385
1	33	Male	Davidson County	No	Yes	No	No	No	No	Work full-time	Married	Yes	No	Very concerned	Very concerned	Very concerned	Very concerned	Health impacts of COVID-19	Bachelor's degree or higher	$50,000 - $74,999		6 County region	25-34	1	Yes	No	Male 25 thru 34	1	1.42702	1.42702	0.730096	0.730096	1.31307	0.958666
1	37	Female	Shelby County	No	No	No	No	Yes	No	Unemployed	Living with someone	Yes	No	Somewhat concerned	Somewhat concerned	Somewhat concerned	Somewhat concerned	Economic impacts of COVID-19	Some college or associate's degree	$25,000 - $34,999		6 County region	35-44	1	No	No	Female 35 thru 44	1	0.763453	0.763453	0.730096	0.730096	0.802961	0.586239
1	48	Female	Knox County	No	No	No	No	Yes	No	Work full-time	Married	No	No	Not at all concerned	Not very concerned	Not very concerned	Very concerned	Economic impacts of COVID-19	Bachelor's degree or higher	$75,000 - $99,999		6 County region	45-54	1	No	No	Female 45 thru 54	1	0.817142	0.817142	0.730096	0.730096	0.850522	0.620963
1	44	Male	Knox County	No	No	No	No	Yes	No	Work part-time	Living with someone	Yes	No	Very concerned	Very concerned	Extremely concerned	Extremely concerned	Health impacts of COVID-19	Some college or associate's degree	$50,000 - $74,999		6 County region	35-44	1	No	No	Male 35 thru 44	1	1.00481	1.00481	0.730096	0.730096	0.954872	0.697148
1	46	Female	Knox County	No	No	No	No	Yes	No	Work full-time	Married	No	No	Very concerned	Very concerned	Somewhat concerned	Somewhat concerned	Economic impacts of COVID-19	Some college or associate's degree	$25,000 - $34,999		6 County region	45-54	1	No	No	Female 45 thru 54	1	0.817142	0.817142	0.730096	0.730096	0.850522	0.620963
1	71	Female	Knox County	No	No	No	No	No	No	Retired	Divorced	No	Yes	Not very concerned	Somewhat concerned	Somewhat concerned	Very concerned	Health impacts of COVID-19	Some college or associate's degree	Less than $15,000		6 County region	65+	0	No	No	Female 65+	1	1.01201	1.01201	0.730096	0.730096	1.05035	0.766853
1	67	Female	Knox County	No	No	No	No	Yes	No	Retired	Divorced	No	No	Very concerned	Very concerned	Very concerned	Very concerned	Health impacts of COVID-19	Bachelor's degree or higher	$35,000 - $49,999		6 County region	65+	1	No	No	Female 65+	1	1.01201	1.01201	0.730096	0.730096	1.05035	0.766853
1	26	Female	Sullivan County	No	No	No	No	Yes	No	Work part-time	Dating	No	No	Very concerned	Very concerned	Very concerned	Extremely concerned	Economic impacts of COVID-19	High school graduate or GED	Less than $15,000		6 County region	25-34	1	No	No	Female 25 thru 34	1	0.911825	0.911825	0.730096	0.730096	0.854477	0.62385
1	20	Female	Shelby County	No	No	Yes	No	No	No	Student	Dating	No	No	Very concerned	Extremely concerned	Extremely concerned	Very concerned	Health impacts of COVID-19	High school graduate or GED	$50,000 - $74,999		6 County region	18-24	1	No	No	Female 18 thru 24	0.717294	0.654556	0.469509	0.730096	0.523693	0.698121	0.365601	0.394655	0.283084
1	41	Female	Hamilton County	No	No	No	No	Yes	No	Work full-time	Married	Yes	No	Very concerned	Very concerned	Very concerned	Very concerned	Economic impacts of COVID-19	Some college or associate's degree	$100,000 - $149,999		6 County region	35-44	1	No	No	Female 35 thru 44	1	0.763453	0.763453	0.730096	0.730096	0.802961	0.586239
1	48	Female	Davidson County	No	No	No	No	Yes	No	Work part-time	Single	No	Yes	Somewhat concerned	Somewhat concerned	Extremely concerned	Very concerned	Health impacts of COVID-19	Some college or associate's degree	$100,000 - $149,999		6 County region	45-54	1	No	No	Female 45 thru 54	1	0.817142	0.817142	0.730096	0.730096	0.850522	0.620963
1	56	Female	Madison County	No	No	No	No	Yes	No	Retired	Married	No	Yes	Not very concerned	Not at all concerned	Not at all concerned	Not very concerned	Economic impacts of COVID-19	Some college or associate's degree	$100,000 - $149,999		6 County region	55-64	1	No	No	Female 55 thru 64	1	0.850711	0.850711	0.730096	0.730096	0.862899	0.629999
1	61	Female	Davidson County	No	No	No	No	Yes	No	Work full-time	Married	Yes	No	Not very concerned	Somewhat concerned	Somewhat concerned	Very concerned	Economic impacts of COVID-19	Bachelor's degree or higher	$150,000 or more		6 County region	55-64	1	No	No	Female 55 thru 64	1	0.850711	0.850711	0.730096	0.730096	0.862899	0.629999
1	18	Female	Shelby County	No	No	Yes	Yes	No	No	Unemployed	Single	No	Yes	Extremely concerned	Extremely concerned	Extremely concerned	Very concerned	Economic impacts of COVID-19	High school graduate or GED	$15,000 - $24,999		6 County region	18-24	2	No	No	Female 18 thru 24	0.717294	0.654556	0.469509	0.730096	0.523693	0.698121	0.365601	0.394655	0.283084
1	40	Female	Knox County	No	No	No	No	Yes	No	Work full-time	Married	Yes	No	Extremely concerned	Extremely concerned	Extremely concerned	Somewhat concerned	Health impacts of COVID-19	Bachelor's degree or higher	$50,000 - $74,999		6 County region	35-44	1	No	No	Female 35 thru 44	1	0.763453	0.763453	0.730096	0.730096	0.802961	0.586239
1	35	Female	Knox County	No	No	No	No	Yes	No	Stay-at-Home Caregiver	Single	Yes	Yes	Very concerned	Very concerned	Very concerned	Very concerned	Health impacts of COVID-19	Less than high school graduate	Less than $15,000		6 County region	35-44	1	No	No	Female 35 thru 44	1	0.763453	0.763453	0.730096	0.730096	0.802961	0.586239
1	64	Female	Madison County	No	No	No	No	Yes	No	Work part-time	Single	No	Yes	Not at all concerned	Not at all concerned	Not very concerned	Very concerned	Economic impacts of COVID-19	High school graduate or GED	$35,000 - $49,999		6 County region	55-64	1	No	No	Female 55 thru 64	1	0.850711	0.850711	0.730096	0.730096	0.862899	0.629999
1	28	Female	Shelby County	Yes	No	Yes	No	Yes	No	Stay-at-Home Caregiver	Living with someone	Yes	No	Very concerned	Very concerned	Extremely concerned	Extremely concerned	Health impacts of COVID-19	High school graduate or GED	$15,000 - $24,999		6 County region	25-34	3	No	No	Female 25 thru 34	0.717294	0.911825	0.654046	0.730096	0.523693	0.854477	0.447484	0.857145	0.614825
1	59	Female	Davidson County	No	No	No	No	Yes	No	Work part-time	Married	No	Yes	Somewhat concerned	Somewhat concerned	Very concerned	Very concerned	Health impacts of COVID-19	Bachelor's degree or higher	$150,000 or more		6 County region	55-64	1	No	No	Female 55 thru 64	1	0.850711	0.850711	0.730096	0.730096	0.862899	0.629999
1	27	Female	Hamilton County	No	No	No	No	Yes	No	Work full-time	Married	No	Yes	Somewhat concerned	Extremely concerned	Very concerned	Extremely concerned	Health impacts of COVID-19	Some college or associate's degree	$15,000 - $24,999		6 County region	25-34	1	No	No	Female 25 thru 34	1	0.911825	0.911825	0.730096	0.730096	0.854477	0.62385
1	45	Female	Knox County	No	No	No	No	Yes	No	Work full-time	Married	No	No	Not very concerned	Not very concerned	Somewhat concerned	Extremely concerned	Economic impacts of COVID-19	Bachelor's degree or higher	$75,000 - $99,999		6 County region	45-54	1	No	No	Female 45 thru 54	1	0.817142	0.817142	0.730096	0.730096	0.850522	0.620963
1	34	Female	Davidson County	No	No	No	No	Yes	No	Work full-time	Divorced	No	No	Not very concerned	Not very concerned	Very concerned	Somewhat concerned	Health impacts of COVID-19	Bachelor's degree or higher	$100,000 - $149,999		6 County region	25-34	1	No	No	Female 25 thru 34	1	0.911825	0.911825	0.730096	0.730096	0.854477	0.62385
1	18	Male	Davidson County	No	Yes	No	No	No	No	Stay-at-Home Caregiver	Divorced	Yes	No	Extremely concerned	Extremely concerned	Extremely concerned	Extremely concerned	Health impacts of COVID-19	Less than high school graduate	Less than $15,000		6 County region	18-24	1	Yes	No	Male 18 thru 24	1	1.23261	1.23261	0.730096	0.730096	1.24389	0.908157
1	24	Female	Knox County	Yes	No	No	No	Yes	No	Work full-time	Married	No	No	Somewhat concerned	Very concerned	Extremely concerned	Extremely concerned	Economic impacts of COVID-19	High school graduate or GED	$50,000 - $74,999		6 County region	18-24	2	No	No	Female 18 thru 24	1	0.654556	0.654556	0.730096	0.730096	0.698121	0.509695
1	48	Female	Hamilton County	No	No	No	No	Yes	No	Work full-time	Married	No	Yes	Not very concerned	Not very concerned	Very concerned	Extremely concerned	Economic impacts of COVID-19	Some college or associate's degree	$100,000 - $149,999		6 County region	45-54	1	No	No	Female 45 thru 54	1	0.817142	0.817142	0.730096	0.730096	0.850522	0.620963
1	33	Female	Shelby County	No	No	No	No	Yes	No	Work full-time	Married	No	Yes	Somewhat concerned	Somewhat concerned	Somewhat concerned	Very concerned	Economic impacts of COVID-19	Bachelor's degree or higher	$50,000 - $74,999		6 County region	25-34	1	No	No	Female 25 thru 34	1	0.911825	0.911825	0.730096	0.730096	0.854477	0.62385
1	56	Female	Hamilton County	No	No	No	No	Yes	No	Retired	Married	No	Yes	Very concerned	Very concerned	Extremely concerned	Extremely concerned	Health impacts of COVID-19	Bachelor's degree or higher	$50,000 - $74,999		6 County region	55-64	1	No	No	Female 55 thru 64	1	0.850711	0.850711	0.730096	0.730096	0.862899	0.629999
1	27	Male	Knox County	Yes	No	No	No	Yes	No	Work full-time	Married	No	No	Not at all concerned	Not at all concerned	Not very concerned	Somewhat concerned	Economic impacts of COVID-19	Bachelor's degree or higher	$75,000 - $99,999		6 County region	25-34	2	No	No	Male 25 thru 34	1	1.42702	1.42702	0.730096	0.730096	1.31307	0.958666
1	26	Female	Sullivan County	No	No	No	No	Yes	No	Work full-time	Living with someone	No	No	Not very concerned	Not very concerned	Somewhat concerned	Very concerned	Economic impacts of COVID-19	Some college or associate's degree	$35,000 - $49,999		6 County region	25-34	1	No	No	Female 25 thru 34	1	0.911825	0.911825	0.730096	0.730096	0.854477	0.62385
1	37	Female	Shelby County	No	No	Yes	No	No	No	Work full-time	Single	Yes	Yes	Somewhat concerned	Somewhat concerned	Somewhat concerned	Very concerned	Health impacts of COVID-19	Bachelor's degree or higher	$50,000 - $74,999		6 County region	35-44	1	No	No	Female 35 thru 44	0.717294	0.763453	0.54762	0.730096	0.523693	0.802961	0.420505	0.733349	0.526027
1	40	Female	Sullivan County	No	No	No	No	Yes	No	Unemployed	Divorced	No	No	Somewhat concerned	Very concerned	Extremely concerned	Very concerned	Health impacts of COVID-19	Some college or associate's degree	Less than $15,000		6 County region	35-44	1	No	No	Female 35 thru 44	1	0.763453	0.763453	0.730096	0.730096	0.802961	0.586239
1	70	Male	Shelby County	No	No	No	No	Yes	No	Retired	Married	No	No	Very concerned	Very concerned	Extremely concerned	Extremely concerned	Health impacts of COVID-19	Some college or associate's degree	$100,000 - $149,999		6 County region	65+	1	No	No	Male 65+	1	1.7571	1.7571	0.730096	0.730096	1.31733	0.961778
1	27	Female	Knox County	No	No	Yes	No	No	No	Unemployed	Single	Yes	No	Extremely concerned	Extremely concerned	Extremely concerned	Extremely concerned	Economic impacts of COVID-19	High school graduate or GED	Less than $15,000		6 County region	25-34	1	No	No	Female 25 thru 34	0.717294	0.911825	0.654046	0.730096	0.523693	0.854477	0.447484	0.857145	0.614825
1	40	Male	Hamilton County	No	No	No	No	Yes	No	Work full-time	Married	Yes	No	Somewhat concerned	Very concerned	Very concerned	Very concerned	Economic impacts of COVID-19	Bachelor's degree or higher	$25,000 - $34,999		6 County region	35-44	1	No	No	Male 35 thru 44	1	1.00481	1.00481	0.730096	0.730096	0.954872	0.697148
1	62	Male	Hamilton County	No	No	No	No	Yes	No	Work full-time	Single	No	Yes	Not very concerned	Not very concerned	Not very concerned	Very concerned	Economic impacts of COVID-19	Bachelor's degree or higher	$35,000 - $49,999		6 County region	55-64	1	No	No	Male 55 thru 65	1	1.15827	1.15827	0.730096	0.730096	1.10949	0.810036
1	22	Female	Shelby County	No	No	No	No	Yes	No	Student	Living with someone	No	No	Somewhat concerned	Extremely concerned	Extremely concerned	Extremely concerned	Economic impacts of COVID-19	Bachelor's degree or higher	Less than $15,000		6 County region	18-24	1	No	No	Female 18 thru 24	1	0.654556	0.654556	0.730096	0.730096	0.698121	0.509695
1	31	Female	Davidson County	Yes	No	Yes	No	Yes	No	Work part-time	Dating	Yes	Yes	Very concerned	Extremely concerned	Extremely concerned	Extremely concerned	Health impacts of COVID-19	High school graduate or GED	$15,000 - $24,999		6 County region	25-34	3	No	No	Female 25 thru 34	0.717294	0.911825	0.654046	0.730096	0.523693	0.854477	0.447484	0.857145	0.614825
1	19	Female	Davidson County	No	No	No	Yes	No	No	Work part-time	Single	Yes	No	Not at all concerned	Not very concerned	Not at all concerned	Very concerned	Economic impacts of COVID-19	Some college or associate's degree	$25,000 - $34,999		6 County region	18-24	1	Yes	No	Female 18 thru 24	1	0.654556	0.654556	0.730096	0.730096	0.698121	0.509695
1	44	Female	Davidson County	No	No	Yes	No	No	No	Work full-time	Married	Yes	No	Somewhat concerned	Somewhat concerned	Somewhat concerned	Very concerned	Economic impacts of COVID-19	Bachelor's degree or higher	$75,000 - $99,999		6 County region	35-44	1	No	No	Female 35 thru 44	0.717294	0.763453	0.54762	0.730096	0.523693	0.802961	0.420505	0.733349	0.526027
1	54	Female	Davidson County	No	No	No	No	Yes	No	Work full-time	Separated	No	No	Not at all concerned	Not very concerned	Extremely concerned	Extremely concerned	Economic impacts of COVID-19	High school graduate or GED	$50,000 - $74,999		6 County region	45-54	1	No	No	Female 45 thru 54	1	0.817142	0.817142	0.730096	0.730096	0.850522	0.620963
1	58	Female	Sullivan County	No	No	No	No	Yes	No	Retired	Married	No	Yes	Not at all concerned	Not at all concerned	Not very concerned	Very concerned	Economic impacts of COVID-19	Some college or associate's degree	$150,000 or more		6 County region	55-64	1	No	No	Female 55 thru 64	1	0.850711	0.850711	0.730096	0.730096	0.862899	0.629999
1	20	Female	Davidson County	No	No	No	No	Yes	No	Student	Dating	No	No	Somewhat concerned	Somewhat concerned	Extremely concerned	Extremely concerned	Health impacts of COVID-19	Some college or associate's degree	Less than $15,000		6 County region	18-24	1	No	No	Female 18 thru 24	1	0.654556	0.654556	0.730096	0.730096	0.698121	0.509695
1	34	Female	Davidson County	No	No	No	No	Yes	No	Unemployed	Living with someone	Yes	No	Very concerned	Extremely concerned	Extremely concerned	Extremely concerned	Economic impacts of COVID-19	Some college or associate's degree	Less than $15,000		6 County region	25-34	1	No	No	Female 25 thru 34	1	0.911825	0.911825	0.730096	0.730096	0.854477	0.62385
1	41	Female	Davidson County	No	No	Yes	No	No	No	Work part-time	Single	Yes	No	Not very concerned	Not at all concerned	Not at all concerned	Very concerned	Health impacts of COVID-19	High school graduate or GED	$35,000 - $49,999		6 County region	35-44	1	No	No	Female 35 thru 44	0.717294	0.763453	0.54762	0.730096	0.523693	0.802961	0.420505	0.733349	0.526027
1	53	Female	Shelby County	No	No	Yes	No	No	No	Unemployed	Single	No	No	Extremely concerned	Somewhat concerned	Somewhat concerned	Extremely concerned	Health impacts of COVID-19	Some college or associate's degree	Less than $15,000		6 County region	45-54	1	No	No	Female 45 thru 54	0.717294	0.817142	0.586131	0.730096	0.523693	0.850522	0.445413	0.900985	0.646271
1	63	Female	Knox County	No	No	No	No	Yes	No	Retired	Married	No	Yes	Somewhat concerned	Somewhat concerned	Very concerned	Extremely concerned	Economic impacts of COVID-19	Some college or associate's degree	$100,000 - $149,999		6 County region	55-64	1	No	No	Female 55 thru 64	1	0.850711	0.850711	0.730096	0.730096	0.862899	0.629999
1	35	Female	Davidson County	No	No	No	No	Yes	No	Work full-time	Married	Yes	No	Extremely concerned	Somewhat concerned	Extremely concerned	Extremely concerned	Health impacts of COVID-19	Bachelor's degree or higher	$100,000 - $149,999		6 County region	35-44	1	No	No	Female 35 thru 44	1	0.763453	0.763453	0.730096	0.730096	0.802961	0.586239
1	27	Female	Knox County	No	No	No	No	Yes	No	Work part-time	Married	No	No	Very concerned	Very concerned	Very concerned	Very concerned	Health impacts of COVID-19	Some college or associate's degree	$50,000 - $74,999		6 County region	25-34	1	No	No	Female 25 thru 34	1	0.911825	0.911825	0.730096	0.730096	0.854477	0.62385
1	43	Female	Davidson County	No	No	No	No	Yes	No	Unemployed	Married	Yes	No	Extremely concerned	Extremely concerned	Extremely concerned	Extremely concerned	Economic impacts of COVID-19	Some college or associate's degree	$50,000 - $74,999		6 County region	35-44	1	No	No	Female 35 thru 44	1	0.763453	0.763453	0.730096	0.730096	0.802961	0.586239
1	30	Male	Knox County	No	No	No	No	Yes	No	Work full-time	Married	Yes	No	Not at all concerned	Not very concerned	Not very concerned	Very concerned	Economic impacts of COVID-19	High school graduate or GED	$100,000 - $149,999		6 County region	25-34	1	No	No	Male 25 thru 34	1	1.42702	1.42702	0.730096	0.730096	1.31307	0.958666
1	60	Male	Davidson County	No	No	No	No	Yes	No	Retired	Divorced	No	No	Not very concerned	Not very concerned	Somewhat concerned	Very concerned	Economic impacts of COVID-19	Some college or associate's degree	$25,000 - $34,999		6 County region	55-64	1	No	No	Male 55 thru 65	1	1.15827	1.15827	0.730096	0.730096	1.10949	0.810036
1	25	Female	Knox County	No	No	No	No	Yes	No	Work full-time	Dating	No	No	Somewhat concerned	Somewhat concerned	Very concerned	Very concerned	Economic impacts of COVID-19	Some college or associate's degree	$50,000 - $74,999		6 County region	25-34	1	No	No	Female 25 thru 34	1	0.911825	0.911825	0.730096	0.730096	0.854477	0.62385
1	58	Male	Shelby County	No	No	No	No	Yes	No	Work full-time	Married	Yes	Yes	Somewhat concerned	Somewhat concerned	Very concerned	Very concerned	Health impacts of COVID-19	Bachelor's degree or higher	$100,000 - $149,999		6 County region	55-64	1	No	No	Male 55 thru 65	1	1.15827	1.15827	0.730096	0.730096	1.10949	0.810036
1	40	Male	Shelby County	No	No	Yes	No	No	No	Work full-time	Married	No	Yes	Somewhat concerned	Not very concerned	Somewhat concerned	Somewhat concerned	Economic impacts of COVID-19	High school graduate or GED	$25,000 - $34,999		6 County region	35-44	1	No	No	Male 35 thru 44	0.717294	1.00481	0.720747	0.730096	0.523693	0.954872	0.50006	1.07527	0.771287
1	24	Female	Davidson County	No	No	No	No	Yes	No	Student	Single	No	No	Very concerned	Very concerned	Somewhat concerned	Somewhat concerned	Health impacts of COVID-19	Bachelor's degree or higher	$50,000 - $74,999		6 County region	18-24	1	No	No	Female 18 thru 24	1	0.654556	0.654556	0.730096	0.730096	0.698121	0.509695
1	19	Male	Hamilton County	No	No	No	No	Yes	No	Work part-time	Dating	No	No	Somewhat concerned	Very concerned	Very concerned	Very concerned	Health impacts of COVID-19	High school graduate or GED	$15,000 - $24,999		6 County region	18-24	1	No	No	Male 18 thru 24	1	1.23261	1.23261	0.730096	0.730096	1.24389	0.908157
1	22	Male	Knox County	No	No	No	No	Yes	No	Unemployed	Single	No	No	Not at all concerned	Not at all concerned	Not at all concerned	Not at all concerned	Economic impacts of COVID-19	Less than high school graduate	$100,000 - $149,999		6 County region	18-24	1	No	No	Male 18 thru 24	1	1.23261	1.23261	0.730096	0.730096	1.24389	0.908157
1	30	Female	Davidson County	No	No	No	No	Yes	No	Work full-time	Single	No	No	Somewhat concerned	Somewhat concerned	Very concerned	Very concerned	Health impacts of COVID-19	Bachelor's degree or higher	$50,000 - $74,999		6 County region	25-34	1	No	No	Female 25 thru 34	1	0.911825	0.911825	0.730096	0.730096	0.854477	0.62385
1	55	Female	Shelby County	No	No	Yes	No	No	No	Unemployed	Single	No	No	Extremely concerned	Extremely concerned	Extremely concerned	Extremely concerned	Economic impacts of COVID-19	Less than high school graduate	Less than $15,000		6 County region	55-64	1	No	No	Female 55 thru 64	0.717294	0.850711	0.610209	0.730096	0.523693	0.862899	0.451894	1.04624	0.750462
1	18	Male	Shelby County	No	Yes	No	No	No	No	Student	Single	No	No	Not at all concerned	Somewhat concerned	Somewhat concerned	Somewhat concerned	Economic impacts of COVID-19	Less than high school graduate	Less than $15,000		6 County region	18-24	1	Yes	No	Male 18 thru 24	1	1.23261	1.23261	0.730096	0.730096	1.24389	0.908157
1	63	Female	Knox County	No	No	No	No	Yes	No	Unemployed	Single	No	Yes	Not very concerned	Not very concerned	Extremely concerned	Very concerned	Health impacts of COVID-19	Some college or associate's degree	Less than $15,000		6 County region	55-64	1	No	No	Female 55 thru 64	1	0.850711	0.850711	0.730096	0.730096	0.862899	0.629999
1	55	Female	Hamilton County	No	No	No	No	Yes	No	Stay-at-Home Caregiver	Married	No	No	Somewhat concerned	Somewhat concerned	Very concerned	Somewhat concerned	Economic impacts of COVID-19	High school graduate or GED	$25,000 - $34,999		6 County region	55-64	1	No	No	Female 55 thru 64	1	0.850711	0.850711	0.730096	0.730096	0.862899	0.629999
1	59	Male	Shelby County	No	No	Yes	No	No	No	Work part-time	Single	No	No	Very concerned	Somewhat concerned	Somewhat concerned	Somewhat concerned	Economic impacts of COVID-19	Bachelor's degree or higher	$25,000 - $34,999		6 County region	55-64	1	No	No	Male 55 thru 65	0.717294	1.15827	0.830822	0.730096	0.523693	1.10949	0.581034	5.59077	4.01022
1	32	Male	Davidson County	No	No	No	No	Yes	No	Looking for work	Divorced	No	No	Somewhat concerned	Somewhat concerned	Somewhat concerned	Extremely concerned	Economic impacts of COVID-19	Bachelor's degree or higher	$50,000 - $74,999		6 County region	25-34	1	No	No	Male 25 thru 34	1	1.42702	1.42702	0.730096	0.730096	1.31307	0.958666
1	28	Female	Shelby County	No	No	No	No	No	Yes	Work full-time	Single	No	No	Not at all concerned	Not at all concerned	Not at all concerned	Not at all concerned	Economic impacts of COVID-19	Bachelor's degree or higher	Less than $15,000		6 County region	25-34	1	Yes	No	Female 25 thru 34	1	0.911825	0.911825	0.730096	0.730096	0.854477	0.62385
1	34	Female	Knox County	No	No	No	No	Yes	No	Stay-at-Home Caregiver	Living with someone	Yes	Yes	Very concerned	Extremely concerned	Extremely concerned	Extremely concerned	Health impacts of COVID-19	Some college or associate's degree	$25,000 - $34,999		6 County region	25-34	1	No	No	Female 25 thru 34	1	0.911825	0.911825	0.730096	0.730096	0.854477	0.62385
1	51	Female	Sullivan County	No	No	No	No	Yes	No	Retired	Divorced	No	Yes	Extremely concerned	Very concerned	Extremely concerned	Extremely concerned	Health impacts of COVID-19	Some college or associate's degree	Less than $15,000		6 County region	45-54	1	No	No	Female 45 thru 54	1	0.817142	0.817142	0.730096	0.730096	0.850522	0.620963
1	44	Female	Hamilton County	No	No	No	No	Yes	No	Work full-time	Married	No	Yes	Somewhat concerned	Somewhat concerned	Very concerned	Very concerned	Economic impacts of COVID-19	Bachelor's degree or higher	$50,000 - $74,999		6 County region	35-44	1	No	No	Female 35 thru 44	1	0.763453	0.763453	0.730096	0.730096	0.802961	0.586239
1	27	Female	Knox County	No	No	No	No	Yes	No	Stay-at-Home Caregiver	Living with someone	Yes	No	Extremely concerned	Extremely concerned	Extremely concerned	Extremely concerned	Economic impacts of COVID-19	Some college or associate's degree	$35,000 - $49,999		6 County region	25-34	1	No	No	Female 25 thru 34	1	0.911825	0.911825	0.730096	0.730096	0.854477	0.62385
1	19	Male	Davidson County	No	No	Yes	No	Yes	No	Work part-time	Living with someone	No	No	Somewhat concerned	Not very concerned	Somewhat concerned	Somewhat concerned	Health impacts of COVID-19	High school graduate or GED	$100,000 - $149,999		6 County region	18-24	2	No	No	Male 18 thru 24	0.717294	1.23261	0.884145	0.730096	0.523693	1.24389	0.651415	0.8773	0.629282
1	42	Male	Shelby County	No	No	No	No	Yes	No	Work full-time	Married	Yes	No	Not very concerned	Not very concerned	Somewhat concerned	Extremely concerned	Economic impacts of COVID-19	Bachelor's degree or higher	$100,000 - $149,999		6 County region	35-44	1	No	No	Male 35 thru 44	1	1.00481	1.00481	0.730096	0.730096	0.954872	0.697148
1	82	Female	Hamilton County	No	No	No	No	Yes	No	Retired	Single	No	Yes	Extremely concerned	Extremely concerned	Extremely concerned	Extremely concerned	Health impacts of COVID-19	Bachelor's degree or higher	$50,000 - $74,999		6 County region	65+	1	No	No	Female 65+	1	1.01201	1.01201	0.730096	0.730096	1.05035	0.766853
1	48	Female	Knox County	No	No	No	No	Yes	No	Work part-time	Living with someone	No	No	Not very concerned	Somewhat concerned	Somewhat concerned	Very concerned	Economic impacts of COVID-19	Bachelor's degree or higher	$15,000 - $24,999		6 County region	45-54	1	No	No	Female 45 thru 54	1	0.817142	0.817142	0.730096	0.730096	0.850522	0.620963
1	52	Female	Davidson County	No	No	No	No	Yes	No	Unemployed	Single	No	Yes	Somewhat concerned	Extremely concerned	Extremely concerned	Very concerned	Economic impacts of COVID-19	Some college or associate's degree	$25,000 - $34,999		6 County region	45-54	1	No	No	Female 45 thru 54	1	0.817142	0.817142	0.730096	0.730096	0.850522	0.620963
1	63	Female	Sullivan County	No	No	No	No	Yes	No	Retired	Divorced	Yes	Yes	Very concerned	Somewhat concerned	Somewhat concerned	Very concerned	Health impacts of COVID-19	Some college or associate's degree	$25,000 - $34,999		6 County region	55-64	1	No	No	Female 55 thru 64	1	0.850711	0.850711	0.730096	0.730096	0.862899	0.629999
1	59	Female	Davidson County	No	No	No	No	Yes	No	Unemployed	Single	No	No	I have already tested positive for COVID-19.	Somewhat concerned	Somewhat concerned	Extremely concerned	Economic impacts of COVID-19	Less than high school graduate	Less than $15,000		6 County region	55-64	1	No	No	Female 55 thru 64	1	0.850711	0.850711	0.730096	0.730096	0.862899	0.629999
1	55	Female	Shelby County	No	No	No	No	Yes	No	Stay-at-Home Caregiver	Divorced	No	Yes	Somewhat concerned	Very concerned	Very concerned	Extremely concerned	Economic impacts of COVID-19	High school graduate or GED	$75,000 - $99,999		6 County region	55-64	1	No	No	Female 55 thru 64	1	0.850711	0.850711	0.730096	0.730096	0.862899	0.629999
1	61	Male	Davidson County	No	No	Yes	No	No	No	Unemployed	Single	No	Yes	Extremely concerned	Extremely concerned	Extremely concerned	Extremely concerned	Health impacts of COVID-19	High school graduate or GED	$35,000 - $49,999		6 County region	55-64	1	No	No	Male 55 thru 65	0.717294	1.15827	0.830822	0.730096	0.523693	1.10949	0.581034	5.59077	4.01022
1	25	Female	Hamilton County	No	No	No	No	Yes	No	Unemployed	Living with someone	No	No	Not very concerned	Not very concerned	Somewhat concerned	Very concerned	Economic impacts of COVID-19	Bachelor's degree or higher	$75,000 - $99,999		6 County region	25-34	1	No	No	Female 25 thru 34	1	0.911825	0.911825	0.730096	0.730096	0.854477	0.62385
1	22	Female	Davidson County	No	No	No	Yes	No	No	Student	Single	No	Yes	Very concerned	Very concerned	Extremely concerned	Very concerned	Health impacts of COVID-19	Some college or associate's degree	$25,000 - $34,999		6 County region	18-24	1	Yes	No	Female 18 thru 24	1	0.654556	0.654556	0.730096	0.730096	0.698121	0.509695
1	50	Male	Knox County	No	No	No	No	No	No	Work full-time	Married	No	No	Extremely concerned	Very concerned	Very concerned	Extremely concerned	Health impacts of COVID-19	Bachelor's degree or higher	$50,000 - $74,999		6 County region	45-54	0	No	No	Male 45 thru 54	1	1.2468	1.2468	0.730096	0.730096	1.43334	1.04648
1	26	Female	Sullivan County	No	No	No	No	Yes	No	Work full-time	Married	No	No	Somewhat concerned	Somewhat concerned	Somewhat concerned	Somewhat concerned	Economic impacts of COVID-19	Some college or associate's degree	$15,000 - $24,999		6 County region	25-34	1	No	No	Female 25 thru 34	1	0.911825	0.911825	0.730096	0.730096	0.854477	0.62385
1	60	Female	Davidson County	No	No	No	No	Yes	No	Work full-time	Married	No	Yes	Extremely concerned	Extremely concerned	Extremely concerned	Extremely concerned	Health impacts of COVID-19	Bachelor's degree or higher	$100,000 - $149,999		6 County region	55-64	1	No	No	Female 55 thru 64	1	0.850711	0.850711	0.730096	0.730096	0.862899	0.629999
1	65	Male	Sullivan County	No	No	No	No	Yes	No	Work full-time	Married	Yes	Yes	Somewhat concerned	Very concerned	Extremely concerned	Extremely concerned	Health impacts of COVID-19	Bachelor's degree or higher	$50,000 - $74,999		6 County region	65+	1	No	No	Male 65+	1	1.7571	1.7571	0.730096	0.730096	1.31733	0.961778
1	53	Male	Davidson County	No	No	No	No	Yes	No	Looking for work	Married	Yes	Yes	Not very concerned	Somewhat concerned	Very concerned	Extremely concerned	Economic impacts of COVID-19	Bachelor's degree or higher	$100,000 - $149,999		6 County region	45-54	1	No	No	Male 45 thru 54	1	1.2468	1.2468	0.730096	0.730096	1.43334	1.04648
1	18	Female	Shelby County	No	No	No	No	Yes	No	Work part-time	Single	Yes	Yes	Not very concerned	Not very concerned	Not very concerned	Somewhat concerned	Economic impacts of COVID-19	High school graduate or GED	$35,000 - $49,999		6 County region	18-24	1	No	No	Female 18 thru 24	1	0.654556	0.654556	0.730096	0.730096	0.698121	0.509695
1	64	Female	Hamilton County	No	No	No	No	Yes	No	Retired	Married	No	Yes	Somewhat concerned	Not very concerned	Somewhat concerned	Very concerned	Economic impacts of COVID-19	Some college or associate's degree	$50,000 - $74,999		6 County region	55-64	1	No	No	Female 55 thru 64	1	0.850711	0.850711	0.730096	0.730096	0.862899	0.629999
1	47	Female	Hamilton County	No	No	Yes	No	No	No	Work full-time	Married	Yes	Yes	Somewhat concerned	Somewhat concerned	Somewhat concerned	Very concerned	Economic impacts of COVID-19	Some college or associate's degree	$150,000 or more		6 County region	45-54	1	No	No	Female 45 thru 54	0.717294	0.817142	0.586131	0.730096	0.523693	0.850522	0.445413	0.900985	0.646271
1	24	Female	Madison County	No	No	No	No	Yes	No	Work full-time	Living with someone	No	No	Somewhat concerned	Somewhat concerned	Very concerned	Somewhat concerned	Economic impacts of COVID-19	Bachelor's degree or higher	$25,000 - $34,999		6 County region	18-24	1	No	No	Female 18 thru 24	1	0.654556	0.654556	0.730096	0.730096	0.698121	0.509695
1	76	Female	Davidson County	No	No	No	No	Yes	No	Retired	Single	No	No	Not very concerned	Not very concerned	Not very concerned	Extremely concerned	Economic impacts of COVID-19	Bachelor's degree or higher	$25,000 - $34,999		6 County region	65+	1	No	No	Female 65+	1	1.01201	1.01201	0.730096	0.730096	1.05035	0.766853
1	63	Female	Hamilton County	No	No	No	No	Yes	No	Work part-time	Living with someone	No	Yes	Very concerned	Somewhat concerned	Very concerned	Extremely concerned	Health impacts of COVID-19	Some college or associate's degree	$25,000 - $34,999		6 County region	55-64	1	No	No	Female 55 thru 64	1	0.850711	0.850711	0.730096	0.730096	0.862899	0.629999
1	21	Female	Davidson County	No	No	Yes	Yes	No	No	Work part-time	Married	Yes	No	Not very concerned	Extremely concerned	Extremely concerned	Extremely concerned	Economic impacts of COVID-19	Some college or associate's degree	Less than $15,000		6 County region	18-24	2	No	No	Female 18 thru 24	0.717294	0.654556	0.469509	0.730096	0.523693	0.698121	0.365601	0.394655	0.283084
1	30	Male	Knox County	No	No	No	No	Yes	No	Work full-time	Single	No	No	Not at all concerned	Not very concerned	Extremely concerned	Somewhat concerned	Economic impacts of COVID-19	Bachelor's degree or higher	$100,000 - $149,999		6 County region	25-34	1	No	No	Male 25 thru 34	1	1.42702	1.42702	0.730096	0.730096	1.31307	0.958666
1	24	Female	Shelby County	No	No	No	No	Yes	No	Work full-time	Single	No	No	Somewhat concerned	Somewhat concerned	Extremely concerned	Extremely concerned	Economic impacts of COVID-19	Bachelor's degree or higher	$35,000 - $49,999		6 County region	18-24	1	No	No	Female 18 thru 24	1	0.654556	0.654556	0.730096	0.730096	0.698121	0.509695
1	30	Male	Knox County	No	No	No	No	Yes	No		Separated	No	Yes	Somewhat concerned	Not very concerned	Extremely concerned	Very concerned	Economic impacts of COVID-19	Some college or associate's degree	Less than $15,000		6 County region	25-34	1	No	No	Male 25 thru 34	1	1.42702	1.42702	0.730096	0.730096	1.31307	0.958666
1	29	Female	Shelby County	No	No	No	No	Yes	No	Work part-time	Living with someone	No	No	Very concerned	Very concerned	Very concerned	Extremely concerned	Health impacts of COVID-19	Bachelor's degree or higher	$50,000 - $74,999		6 County region	25-34	1	No	No	Female 25 thru 34	1	0.911825	0.911825	0.730096	0.730096	0.854477	0.62385
1	36	Male	Davidson County	No	No	No	No	Yes	No	Work full-time	Single	No	No	Somewhat concerned	Somewhat concerned	Very concerned	Very concerned	Health impacts of COVID-19	Bachelor's degree or higher	$25,000 - $34,999		6 County region	35-44	1	No	No	Male 35 thru 44	1	1.00481	1.00481	0.730096	0.730096	0.954872	0.697148
1	58	Male	Knox County	No	No	No	No	Yes	No	Stay-at-Home Caregiver	Single	No	Yes	Somewhat concerned	Somewhat concerned	Very concerned	Very concerned	Health impacts of COVID-19	Bachelor's degree or higher	$15,000 - $24,999		6 County region	55-64	1	No	No	Male 55 thru 65	1	1.15827	1.15827	0.730096	0.730096	1.10949	0.810036
1	74	Female	Davidson County	No	No	No	No	Yes	No	Retired	Married	No	Yes	Somewhat concerned	Somewhat concerned	Somewhat concerned	Very concerned		High school graduate or GED	$15,000 - $24,999		6 County region	65+	1	No	No	Female 65+	1	1.01201	1.01201	0.730096	0.730096	1.05035	0.766853
1	18	Female	Sullivan County	No	No	No	No	Yes	No	Work full-time	Dating	No	No	Somewhat concerned	Extremely concerned	Extremely concerned	Extremely concerned	Economic impacts of COVID-19	High school graduate or GED	$15,000 - $24,999		6 County region	18-24	1	No	No	Female 18 thru 24	1	0.654556	0.654556	0.730096	0.730096	0.698121	0.509695
1	78	Female	Hamilton County	No	No	No	No	Yes	No	Retired	Married	No	Yes	Not very concerned	Somewhat concerned	Very concerned	Very concerned	Economic impacts of COVID-19	Bachelor's degree or higher	$50,000 - $74,999		6 County region	65+	1	No	No	Female 65+	1	1.01201	1.01201	0.730096	0.730096	1.05035	0.766853
1	54	Female	Hamilton County	No	No	No	No	Yes	No	Stay-at-Home Caregiver	Married	Yes	No	Very concerned	Very concerned	Very concerned	Extremely concerned	Health impacts of COVID-19	High school graduate or GED	$15,000 - $24,999		6 County region	45-54	1	No	No	Female 45 thru 54	1	0.817142	0.817142	0.730096	0.730096	0.850522	0.620963
1	20	Female	Davidson County	No	No	Yes	No	No	No	Unemployed	Single	No	No	Very concerned	Somewhat concerned	Somewhat concerned	Very concerned	Health impacts of COVID-19	Some college or associate's degree	Less than $15,000		6 County region	18-24	1	No	No	Female 18 thru 24	0.717294	0.654556	0.469509	0.730096	0.523693	0.698121	0.365601	0.394655	0.283084
1	19	Female	Knox County	No	No	No	No	Yes	No	Unemployed	Dating	No	No	Not very concerned	Not very concerned	Somewhat concerned	Extremely concerned	Economic impacts of COVID-19	Some college or associate's degree	Less than $15,000		6 County region	18-24	1	No	No	Female 18 thru 24	1	0.654556	0.654556	0.730096	0.730096	0.698121	0.509695
1	21	Female	Davidson County	No	No	No	No	Yes	No	Student	Single	No	No	Somewhat concerned	Very concerned	Extremely concerned	Very concerned	Health impacts of COVID-19	Some college or associate's degree	Less than $15,000		6 County region	18-24	1	No	No	Female 18 thru 24	1	0.654556	0.654556	0.730096	0.730096	0.698121	0.509695
1	60	Female	Hamilton County	No	No	No	No	Yes	No	Unemployed	Married	No	Yes	Somewhat concerned	Not very concerned	Not very concerned	Extremely concerned	Economic impacts of COVID-19	High school graduate or GED	$50,000 - $74,999		6 County region	55-64	1	No	No	Female 55 thru 64	1	0.850711	0.850711	0.730096	0.730096	0.862899	0.629999
1	67	Male	Davidson County	No	No	No	No	Yes	No	Work full-time	Married	No	Yes	Very concerned	Very concerned	Very concerned	Very concerned	Health impacts of COVID-19	High school graduate or GED	$75,000 - $99,999		6 County region	65+	1	No	No	Male 65+	1	1.7571	1.7571	0.730096	0.730096	1.31733	0.961778
1	36	Male	Knox County	No	No	No	No	Yes	No	Work full-time	Married	Yes	No	Not very concerned	Not at all concerned	Somewhat concerned	Somewhat concerned	Economic impacts of COVID-19	Some college or associate's degree	$50,000 - $74,999		6 County region	35-44	1	No	No	Male 35 thru 44	1	1.00481	1.00481	0.730096	0.730096	0.954872	0.697148
1	18	Female	Hamilton County	No	No	Yes	No	Yes	No	Student	Single	No	No	Not very concerned	Somewhat concerned	Somewhat concerned	Somewhat concerned	Health impacts of COVID-19	High school graduate or GED	$25,000 - $34,999		6 County region	18-24	2	No	No	Female 18 thru 24	0.717294	0.654556	0.469509	0.730096	0.523693	0.698121	0.365601	0.394655	0.283084
1	58	Male	Davidson County	No	No	No	No	Yes	No	Student	Married	Yes	Yes	Extremely concerned	Extremely concerned	Extremely concerned	Extremely concerned	Economic impacts of COVID-19	Bachelor's degree or higher	$15,000 - $24,999		6 County region	55-64	1	No	No	Male 55 thru 65	1	1.15827	1.15827	0.730096	0.730096	1.10949	0.810036
1	71	Male	Sullivan County	No	No	No	No	Yes	No	Retired	Married	No	Yes	Not at all concerned	Not very concerned	Not very concerned	Very concerned	Economic impacts of COVID-19	Bachelor's degree or higher	$35,000 - $49,999		6 County region	65+	1	No	No	Male 65+	1	1.7571	1.7571	0.730096	0.730096	1.31733	0.961778
1	20	Female	Knox County	No	No	No	No	Yes	No	Work part-time	Living with someone	Yes	No	Very concerned	Extremely concerned	Extremely concerned	Extremely concerned	Health impacts of COVID-19	High school graduate or GED	$15,000 - $24,999		6 County region	18-24	1	No	No	Female 18 thru 24	1	0.654556	0.654556	0.730096	0.730096	0.698121	0.509695
1	77	Male	Shelby County	No	No	No	No	Yes	No	Retired	Married	No	No	Somewhat concerned	Somewhat concerned	Very concerned	Extremely concerned	Health impacts of COVID-19	Bachelor's degree or higher	$75,000 - $99,999		6 County region	65+	1	No	No	Male 65+	1	1.7571	1.7571	0.730096	0.730096	1.31733	0.961778
1	31	Female	Shelby County	No	No	Yes	No	No	No	Work part-time	Single	Yes	No	Somewhat concerned	Very concerned	Very concerned	Very concerned	Health impacts of COVID-19	Some college or associate's degree	$25,000 - $34,999		6 County region	25-34	1	No	No	Female 25 thru 34	0.717294	0.911825	0.654046	0.730096	0.523693	0.854477	0.447484	0.857145	0.614825
1	45	Female	Knox County	No	No	No	No	Yes	No	Work full-time	Married	Yes	No	Extremely concerned	Extremely concerned	Extremely concerned	Extremely concerned	Health impacts of COVID-19	Some college or associate's degree	$100,000 - $149,999		6 County region	45-54	1	No	No	Female 45 thru 54	1	0.817142	0.817142	0.730096	0.730096	0.850522	0.620963
1	44	Male	Shelby County	No	No	No	No	Yes	No	Work full-time	Married	Yes	No	Very concerned	Extremely concerned	Extremely concerned	Very concerned	Health impacts of COVID-19	Bachelor's degree or higher	$75,000 - $99,999		6 County region	35-44	1	No	No	Male 35 thru 44	1	1.00481	1.00481	0.730096	0.730096	0.954872	0.697148
1	19	Female	Shelby County	No	No	No	No	Yes	No	Unemployed	Single	No	Yes	Extremely concerned	Somewhat concerned	Extremely concerned	Extremely concerned	Economic impacts of COVID-19	High school graduate or GED	Less than $15,000		6 County region	18-24	1	No	No	Female 18 thru 24	1	0.654556	0.654556	0.730096	0.730096	0.698121	0.509695
1	18	Male	Shelby County	No	No	Yes	No	No	No	Student	Separated	Yes	No	Not at all concerned	Extremely concerned	Not at all concerned	Very concerned	Economic impacts of COVID-19	Less than high school graduate	$15,000 - $24,999		6 County region	18-24	1	No	No	Male 18 thru 24	0.717294	1.23261	0.884145	0.730096	0.523693	1.24389	0.651415	0.8773	0.629282
1	21	Other	Davidson County	No	No	No	No	Yes	No	Work part-time	Dating	No	No	Somewhat concerned	Very concerned	Very concerned	Very concerned	Economic impacts of COVID-19	Some college or associate's degree	Less than $15,000		6 County region	18-24	1	No	No		1			0.730096	0.730096
1	63	Male	Knox County	No	No	No	No	Yes	No	Unemployed	Single	No	Yes	Not very concerned	Somewhat concerned	Very concerned	Extremely concerned	Economic impacts of COVID-19	Some college or associate's degree	$35,000 - $49,999		6 County region	55-64	1	No	No	Male 55 thru 65	1	1.15827	1.15827	0.730096	0.730096	1.10949	0.810036
1	53	Male	Sullivan County	No	No	No	No	Yes	No	Unemployed	Separated	No	No	Somewhat concerned	Somewhat concerned	Extremely concerned	Very concerned	Health impacts of COVID-19	High school graduate or GED	Less than $15,000		6 County region	45-54	1	No	No	Male 45 thru 54	1	1.2468	1.2468	0.730096	0.730096	1.43334	1.04648
1	29	Female	Shelby County	No	No	No	No	Yes	No	Stay-at-Home Caregiver	Married	Yes	No	Very concerned	Very concerned	Very concerned	Very concerned	Health impacts of COVID-19	High school graduate or GED	Less than $15,000		6 County region	25-34	1	No	No	Female 25 thru 34	1	0.911825	0.911825	0.730096	0.730096	0.854477	0.62385
1	54	Male	Sullivan County	No	No	No	No	Yes	No	Retired	Single	No	Yes	Somewhat concerned	Somewhat concerned	Somewhat concerned	Somewhat concerned	Economic impacts of COVID-19	High school graduate or GED	Less than $15,000		6 County region	45-54	1	No	No	Male 45 thru 54	1	1.2468	1.2468	0.730096	0.730096	1.43334	1.04648
1	73	Male	Davidson County	No	No	No	No	Yes	No	Retired	Divorced	No	No	Extremely concerned	Extremely concerned	Extremely concerned	Extremely concerned	Health impacts of COVID-19	Some college or associate's degree	$15,000 - $24,999		6 County region	65+	1	No	No	Male 65+	1	1.7571	1.7571	0.730096	0.730096	1.31733	0.961778
1	71	Male	Shelby County	No	No	No	No	Yes	No	Retired	Married	No	Yes	Very concerned	Very concerned		Extremely concerned	Health impacts of COVID-19	Bachelor's degree or higher	$75,000 - $99,999		6 County region	65+	1	No	No	Male 65+	1	1.7571	1.7571	0.730096	0.730096	1.31733	0.961778
1	70	Male	Shelby County	No	No	No	No	Yes	No	Retired	Married	No	Yes	Not at all concerned	Not at all concerned	Not at all concerned	Very concerned	Health impacts of COVID-19	Some college or associate's degree	$75,000 - $99,999		6 County region	65+	1	No	No	Male 65+	1	1.7571	1.7571	0.730096	0.730096	1.31733	0.961778
1	34	Male	Shelby County	No	No	No	No	Yes	No	Work full-time	Married	Yes	No	Extremely concerned	Extremely concerned	Very concerned	Extremely concerned	Health impacts of COVID-19	Bachelor's degree or higher	$100,000 - $149,999		6 County region	25-34	1	No	No	Male 25 thru 34	1	1.42702	1.42702	0.730096	0.730096	1.31307	0.958666
1	47	Male	Shelby County	No	No	No	No	Yes	No	Work full-time	Single	No	No	Somewhat concerned	Not very concerned	Somewhat concerned	Extremely concerned	Economic impacts of COVID-19	Bachelor's degree or higher	$75,000 - $99,999		6 County region	45-54	1	No	No	Male 45 thru 54	1	1.2468	1.2468	0.730096	0.730096	1.43334	1.04648
1	39	Male	Knox County	No	Yes	No	No	No	No	Work full-time	Married	Yes	Yes	Somewhat concerned	Somewhat concerned	Very concerned	Somewhat concerned	Health impacts of COVID-19	Bachelor's degree or higher	$100,000 - $149,999		6 County region	35-44	1	Yes	No	Male 35 thru 44	1	1.00481	1.00481	0.730096	0.730096	0.954872	0.697148
1	50	Male	Davidson County	No	No	No	No	Yes	No	Work full-time	Divorced	No	No	Very concerned	Very concerned	Very concerned	Very concerned	Health impacts of COVID-19	Some college or associate's degree	$25,000 - $34,999		6 County region	45-54	1	No	No	Male 45 thru 54	1	1.2468	1.2468	0.730096	0.730096	1.43334	1.04648
1	58	Male	Shelby County	No	No	No	No	Yes	No	Retired	Married	No	Yes	Somewhat concerned	Somewhat concerned	Somewhat concerned	Somewhat concerned	Health impacts of COVID-19	Bachelor's degree or higher	$150,000 or more		6 County region	55-64	1	No	No	Male 55 thru 65	1	1.15827	1.15827	0.730096	0.730096	1.10949	0.810036
1	30	Male	Knox County	No	No	No	No	Yes	No	Unemployed	Living with someone	No	Yes	Extremely concerned	Extremely concerned	Very concerned	Not very concerned	Economic impacts of COVID-19	High school graduate or GED	Less than $15,000		6 County region	25-34	1	No	No	Male 25 thru 34	1	1.42702	1.42702	0.730096	0.730096	1.31307	0.958666
1	41	Male	Knox County	No	No	No	No	Yes	No	Work full-time	Married	Yes	No	Very concerned	Extremely concerned	Extremely concerned	Extremely concerned	Health impacts of COVID-19	Bachelor's degree or higher	$35,000 - $49,999		6 County region	35-44	1	No	No	Male 35 thru 44	1	1.00481	1.00481	0.730096	0.730096	0.954872	0.697148
1	69	Female	Hamilton County	No	No	No	No	Yes	No	Retired	Divorced	No	Yes	Very concerned	Very concerned	Extremely concerned	Extremely concerned	Economic impacts of COVID-19	Some college or associate's degree	$15,000 - $24,999		6 County region	65+	1	No	No	Female 65+	1	1.01201	1.01201	0.730096	0.730096	1.05035	0.766853
1	35	Male	Davidson County	No	No	Yes	No	No	No	Work full-time	Single	Yes	Yes	Very concerned	Very concerned	Very concerned	Somewhat concerned	Economic impacts of COVID-19	Some college or associate's degree	$50,000 - $74,999		6 County region	35-44	1	No	No	Male 35 thru 44	0.717294	1.00481	0.720747	0.730096	0.523693	0.954872	0.50006	1.07527	0.771287
1	83	Male	Shelby County	No	No	No	No	Yes	No	Retired	Married	No	Yes	Very concerned	Very concerned	Very concerned	Extremely concerned	Health impacts of COVID-19	Bachelor's degree or higher	$35,000 - $49,999		6 County region	65+	1	No	No	Male 65+	1	1.7571	1.7571	0.730096	0.730096	1.31733	0.961778
1	21	Male	Shelby County	No	No	No	No	Yes	No	Work full-time	Single	No	Yes	Not at all concerned	Not at all concerned	Extremely concerned	Very concerned	Economic impacts of COVID-19	High school graduate or GED	$50,000 - $74,999		6 County region	18-24	1	No	No	Male 18 thru 24	1	1.23261	1.23261	0.730096	0.730096	1.24389	0.908157
1	73	Male	Davidson County	No	No	No	No	Yes	No	Work full-time	Single	Yes	Yes	Not very concerned	Not at all concerned	Somewhat concerned	Very concerned	Economic impacts of COVID-19	Some college or associate's degree	$75,000 - $99,999		6 County region	65+	1	No	No	Male 65+	1	1.7571	1.7571	0.730096	0.730096	1.31733	0.961778
1	52	Male	Knox County	No	No	No	No	Yes	No	Work full-time	Living with someone	No	Yes	Very concerned	Very concerned	Very concerned	Very concerned	Health impacts of COVID-19	Bachelor's degree or higher	$50,000 - $74,999		6 County region	45-54	1	No	No	Male 45 thru 54	1	1.2468	1.2468	0.730096	0.730096	1.43334	1.04648
1	18	Male	Shelby County	No	No	No	No	Yes	No	Looking for work	Married	No	Yes	Not very concerned	Very concerned	Very concerned	Not at all concerned	Economic impacts of COVID-19	High school graduate or GED	$35,000 - $49,999		6 County region	18-24	1	No	No	Male 18 thru 24	1	1.23261	1.23261	0.730096	0.730096	1.24389	0.908157
1	68	Female	Hamilton County	No	No	No	No	Yes	No	Unemployed	Married	No	Yes	Extremely concerned	Extremely concerned	Extremely concerned	Extremely concerned	Health impacts of COVID-19	Bachelor's degree or higher	$50,000 - $74,999		6 County region	65+	1	No	No	Female 65+	1	1.01201	1.01201	0.730096	0.730096	1.05035	0.766853
1	66	Male	Shelby County	No	No	No	No	Yes	No	Retired	Married	No	Yes	Somewhat concerned	Very concerned	Very concerned	Extremely concerned	Health impacts of COVID-19	Some college or associate's degree	$35,000 - $49,999		6 County region	65+	1	No	No	Male 65+	1	1.7571	1.7571	0.730096	0.730096	1.31733	0.961778
1	50	Male	Davidson County	No	No	No	No	Yes	No	Work full-time	Married	Yes	No	Somewhat concerned	Not at all concerned	Not very concerned	Somewhat concerned	Economic impacts of COVID-19	Bachelor's degree or higher	$100,000 - $149,999		6 County region	45-54	1	No	No	Male 45 thru 54	1	1.2468	1.2468	0.730096	0.730096	1.43334	1.04648
1	39	Male	Shelby County	No	No	No	Yes	No	No	Work full-time	Married	Yes	No	Extremely concerned	Extremely concerned	Very concerned	Very concerned	Health impacts of COVID-19	Bachelor's degree or higher	$100,000 - $149,999		6 County region	35-44	1	Yes	No	Male 35 thru 44	1	1.00481	1.00481	0.730096	0.730096	0.954872	0.697148
1	72	Female	Knox County	No	No	No	No	Yes	No	Retired	Single	No	No	Not at all concerned	Not very concerned	Somewhat concerned	Somewhat concerned	Economic impacts of COVID-19	Bachelor's degree or higher	$25,000 - $34,999		6 County region	65+	1	No	No	Female 65+	1	1.01201	1.01201	0.730096	0.730096	1.05035	0.766853
1	45	Male	Shelby County	No	No	Yes	No	No	No	Work full-time	Married	No	Yes	Extremely concerned	Extremely concerned	Extremely concerned	Extremely concerned	Economic impacts of COVID-19	Bachelor's degree or higher	$50,000 - $74,999		6 County region	45-54	1	No	No	Male 45 thru 54	0.717294	1.2468	0.894324	0.730096	0.523693	1.43334	0.75063	1.51878	1.08941
1	58	Male	Knox County	No	No	No	No	Yes	No	Retired	Divorced	No	Yes	Somewhat concerned	Extremely concerned	Very concerned	Very concerned	Economic impacts of COVID-19	Some college or associate's degree	$15,000 - $24,999		6 County region	55-64	1	No	No	Male 55 thru 65	1	1.15827	1.15827	0.730096	0.730096	1.10949	0.810036
1	38	Male	Hamilton County	No	No	No	No	Yes	No	Work full-time	Married	Yes	No	Very concerned	Very concerned	Very concerned	Somewhat concerned	Health impacts of COVID-19	Bachelor's degree or higher	$35,000 - $49,999		6 County region	35-44	1	No	No	Male 35 thru 44	1	1.00481	1.00481	0.730096	0.730096	0.954872	0.697148
1	45	Male	Shelby County	No	No	No	No	Yes	No	Work full-time	Married	Yes	No	Not at all concerned	Very concerned	Not very concerned	Extremely concerned	Economic impacts of COVID-19	Some college or associate's degree	$75,000 - $99,999		6 County region	45-54	1	No	No	Male 45 thru 54	1	1.2468	1.2468	0.730096	0.730096	1.43334	1.04648
1	44	Male	Shelby County	No	No	No	No	Yes	No	Work full-time	Married	Yes	No	Not very concerned	Not very concerned	Not very concerned	Extremely concerned	Economic impacts of COVID-19	Bachelor's degree or higher	$100,000 - $149,999		6 County region	35-44	1	No	No	Male 35 thru 44	1	1.00481	1.00481	0.730096	0.730096	0.954872	0.697148
1	19	Male	Shelby County	No	No	Yes	No	No	No	Work full-time	Married	Yes	Yes	Very concerned	Somewhat concerned	Somewhat concerned	Extremely concerned	Health impacts of COVID-19	High school graduate or GED	Less than $15,000		6 County region	18-24	1	No	No	Male 18 thru 24	0.717294	1.23261	0.884145	0.730096	0.523693	1.24389	0.651415	0.8773	0.629282
1	47	Male	Hamilton County	No	No	Yes	No	Yes	No	Work full-time	Married	No	No	Somewhat concerned	Extremely concerned	Extremely concerned	Extremely concerned	Health impacts of COVID-19	High school graduate or GED	$35,000 - $49,999		6 County region	45-54	2	No	No	Male 45 thru 54	0.717294	1.2468	0.894324	0.730096	0.523693	1.43334	0.75063	1.51878	1.08941
1	38	Male	Hamilton County	No	No	No	No	Yes	No	Work full-time	Married	Yes	No	Not at all concerned	Not at all concerned	Not very concerned	Not at all concerned	Economic impacts of COVID-19	Bachelor's degree or higher	$35,000 - $49,999		6 County region	35-44	1	No	No	Male 35 thru 44	1	1.00481	1.00481	0.730096	0.730096	0.954872	0.697148
1	69	Male	Sullivan County	No	No	No	No	Yes	No	Retired	Single	No	Yes	Somewhat concerned	Extremely concerned	Very concerned	Extremely concerned	Health impacts of COVID-19	Some college or associate's degree	Less than $15,000		6 County region	65+	1	No	No	Male 65+	1	1.7571	1.7571	0.730096	0.730096	1.31733	0.961778
1	67	Female	Sullivan County	No	No	No	No	Yes	No	Retired	Married	No	Yes	Not very concerned	Not very concerned	Somewhat concerned	Not at all concerned	Economic impacts of COVID-19	Some college or associate's degree	$25,000 - $34,999		6 County region	65+	1	No	No	Female 65+	1	1.01201	1.01201	0.730096	0.730096	1.05035	0.766853
1	55	Male	Hamilton County	No	No	No	No	Yes	No	Work full-time	Married	Yes	Yes	Not very concerned	Not very concerned	Not very concerned	Very concerned	Economic impacts of COVID-19	Bachelor's degree or higher	$25,000 - $34,999		6 County region	55-64	1	No	No	Male 55 thru 65	1	1.15827	1.15827	0.730096	0.730096	1.10949	0.810036
1	74	Female	Davidson County	No	No	No	No	Yes	No	Retired	Married	No	Yes	Not very concerned	Very concerned	Very concerned	Extremely concerned	Health impacts of COVID-19	Some college or associate's degree	$35,000 - $49,999		6 County region	65+	1	No	No	Female 65+	1	1.01201	1.01201	0.730096	0.730096	1.05035	0.766853
1	51	Male	Davidson County	No	No	No	No	Yes	No	Work full-time	Married	No	No	Somewhat concerned	Somewhat concerned	Somewhat concerned	Somewhat concerned	Health impacts of COVID-19	Some college or associate's degree	$150,000 or more		6 County region	45-54	1	No	No	Male 45 thru 54	1	1.2468	1.2468	0.730096	0.730096	1.43334	1.04648
1	35	Male	Hamilton County	No	No	No	No	Yes	No	Work full-time	Living with someone	No	No	Not at all concerned	Very concerned	Very concerned	Very concerned	Economic impacts of COVID-19	High school graduate or GED	$35,000 - $49,999		6 County region	35-44	1	No	No	Male 35 thru 44	1	1.00481	1.00481	0.730096	0.730096	0.954872	0.697148
1	66	Female	Shelby County	No	No	No	No	Yes	No	Retired	Married	No	Yes	Extremely concerned	Extremely concerned	Extremely concerned	Extremely concerned	Health impacts of COVID-19	Bachelor's degree or higher	$100,000 - $149,999		6 County region	65+	1	No	No	Female 65+	1	1.01201	1.01201	0.730096	0.730096	1.05035	0.766853
1	28	Male	Davidson County	No	No	No	No	Yes	No	Work full-time	Married	Yes	Yes	Very concerned	Somewhat concerned	Extremely concerned	Very concerned	Economic impacts of COVID-19	Some college or associate's degree	$50,000 - $74,999		6 County region	25-34	1	No	No	Male 25 thru 34	1	1.42702	1.42702	0.730096	0.730096	1.31307	0.958666
1	36	Male	Knox County	No	No	Yes	No	No	No	Work full-time	Married	No	No	Somewhat concerned	Not very concerned	Somewhat concerned	Very concerned	Health impacts of COVID-19	Bachelor's degree or higher	$100,000 - $149,999		6 County region	35-44	1	No	Yes, AA oversample	Male 35 thru 44	0.717294	1.00481	0.720747	0.730096	0.523693	0.954872	0.50006	1.07527	0.771287
1	60	Female	Davidson County	No	No	Yes	No	No	No	Unemployed	Single	No	No	Very concerned	Very concerned	Very concerned	Very concerned	Economic impacts of COVID-19	Some college or associate's degree	$15,000 - $24,999		6 County region	55-64	1	No	Yes, AA oversample	Female 55 thru 64	0.717294	0.850711	0.610209	0.730096	0.523693	0.862899	0.451894	1.04624	0.750462
1	23	Female	Knox County	No	No	Yes	No	No	No	Work full-time	Single	No	Yes	Extremely concerned	Extremely concerned	Extremely concerned	Extremely concerned	Health impacts of COVID-19	Bachelor's degree or higher	$75,000 - $99,999		6 County region	18-24	1	No	Yes, AA oversample	Female 18 thru 24	0.717294	0.654556	0.469509	0.730096	0.523693	0.698121	0.365601	0.394655	0.283084
1	25	Female	Shelby County	No	No	Yes	Yes	No	No	Student	Single	No	No	Somewhat concerned	Somewhat concerned	Extremely concerned	Extremely concerned	Health impacts of COVID-19	Bachelor's degree or higher	$25,000 - $34,999		6 County region	25-34	2	No	Yes, AA oversample	Female 25 thru 34	0.717294	0.911825	0.654046	0.730096	0.523693	0.854477	0.447484	0.857145	0.614825
1	19	Female	Davidson County	No	No	Yes	No	No	No	Work part-time	Single	Yes	No	Somewhat concerned	Somewhat concerned	Somewhat concerned	Somewhat concerned	Health impacts of COVID-19	High school graduate or GED	$50,000 - $74,999		6 County region	18-24	1	No	Yes, AA oversample	Female 18 thru 24	0.717294	0.654556	0.469509	0.730096	0.523693	0.698121	0.365601	0.394655	0.283084
1	37	Male	Knox County	No	No	Yes	No	No	No	Work part-time	Divorced	No	No	Somewhat concerned	Very concerned	Somewhat concerned	Extremely concerned	Economic impacts of COVID-19	Some college or associate's degree	$25,000 - $34,999		6 County region	35-44	1	No	Yes, AA oversample	Male 35 thru 44	0.717294	1.00481	0.720747	0.730096	0.523693	0.954872	0.50006	1.07527	0.771287
1	51	Male	Hamilton County	No	No	Yes	No	No	No	Work full-time	Married	Yes	Yes	Extremely concerned	Extremely concerned	Extremely concerned	Extremely concerned	Health impacts of COVID-19	Bachelor's degree or higher	$100,000 - $149,999		6 County region	45-54	1	No	Yes, AA oversample	Male 45 thru 54	0.717294	1.2468	0.894324	0.730096	0.523693	1.43334	0.75063	1.51878	1.08941
1	53	Female	Shelby County	No	No	Yes	No	No	No	Work full-time	Married	No	Yes	Extremely concerned	Very concerned	Very concerned	Extremely concerned	Health impacts of COVID-19	Bachelor's degree or higher	$150,000 or more		6 County region	45-54	1	No	Yes, AA oversample	Female 45 thru 54	0.717294	0.817142	0.586131	0.730096	0.523693	0.850522	0.445413	0.900985	0.646271
1	71	Female	Davidson County	No	No	Yes	No	No	No	Unemployed	Single	No	No	Not at all concerned	Extremely concerned	Extremely concerned	Extremely concerned	Health impacts of COVID-19	Bachelor's degree or higher	$50,000 - $74,999		6 County region	65+	1	No	Yes, AA oversample	Female 65+	0.717294	1.01201	0.72591	0.730096	0.523693	1.05035	0.550059	1.47113	1.05523
1	32	Male	Davidson County	No	No	Yes	No	No	No	Work full-time	Single	No	No	Somewhat concerned	Extremely concerned	Extremely concerned	Somewhat concerned	Health impacts of COVID-19	High school graduate or GED	$50,000 - $74,999		6 County region	25-34	1	No	Yes, AA oversample	Male 25 thru 34	0.717294	1.42702	1.02359	0.730096	0.523693	1.31307	0.687645	1.15163	0.826056
1	35	Female	Knox County	No	No	Yes	No	No	No	Work part-time	Single	Yes	No	Extremely concerned	Extremely concerned	Extremely concerned	Extremely concerned	Health impacts of COVID-19	Some college or associate's degree	Less than $15,000		6 County region	35-44	1	No	Yes, AA oversample	Female 35 thru 44	0.717294	0.763453	0.54762	0.730096	0.523693	0.802961	0.420505	0.733349	0.526027
1	36	Female	Shelby County	No	No	Yes	No	No	No	Work full-time	Married	Yes	Yes	Very concerned	Somewhat concerned	Very concerned	Very concerned	Health impacts of COVID-19	Bachelor's degree or higher	$50,000 - $74,999		6 County region	35-44	1	No	Yes, AA oversample	Female 35 thru 44	0.717294	0.763453	0.54762	0.730096	0.523693	0.802961	0.420505	0.733349	0.526027
1	63	Female	Hamilton County	No	No	Yes	No	No	No	Retired	Single	No	No	Somewhat concerned	Somewhat concerned	Very concerned	Very concerned	Economic impacts of COVID-19	Some college or associate's degree	$35,000 - $49,999		6 County region	55-64	1	No	Yes, AA oversample	Female 55 thru 64	0.717294	0.850711	0.610209	0.730096	0.523693	0.862899	0.451894	1.04624	0.750462
1	50	Female	Davidson County	No	No	Yes	No	No	No	Work full-time	Single	Yes	Yes	Not very concerned	Somewhat concerned	Somewhat concerned	Extremely concerned	Health impacts of COVID-19	High school graduate or GED	$15,000 - $24,999		6 County region	45-54	1	No	Yes, AA oversample	Female 45 thru 54	0.717294	0.817142	0.586131	0.730096	0.523693	0.850522	0.445413	0.900985	0.646271
1	25	Female	Hamilton County	No	No	Yes	No	No	No	Work full-time	Single	Yes	No	Very concerned	Not at all concerned	Extremely concerned	Extremely concerned	Economic impacts of COVID-19	High school graduate or GED	$25,000 - $34,999		6 County region	25-34	1	No	Yes, AA oversample	Female 25 thru 34	0.717294	0.911825	0.654046	0.730096	0.523693	0.854477	0.447484	0.857145	0.614825
1	26	Female	Davidson County	No	No	Yes	No	No	No	Work full-time	Single	No	No	Extremely concerned	Extremely concerned	Extremely concerned	Extremely concerned	Health impacts of COVID-19	High school graduate or GED	$150,000 or more		6 County region	25-34	1	No	Yes, AA oversample	Female 25 thru 34	0.717294	0.911825	0.654046	0.730096	0.523693	0.854477	0.447484	0.857145	0.614825
1	49	Male	Shelby County	No	No	Yes	No	No	No	Work full-time	Married	Yes	No	Very concerned	Very concerned	Extremely concerned	Very concerned	Economic impacts of COVID-19	Some college or associate's degree	$15,000 - $24,999		6 County region	45-54	1	No	Yes, AA oversample	Male 45 thru 54	0.717294	1.2468	0.894324	0.730096	0.523693	1.43334	0.75063	1.51878	1.08941
1	21	Female	Shelby County	No	No	Yes	No	No	No	Student	Single	No	Yes	Not very concerned	Not very concerned	Somewhat concerned	Extremely concerned	Health impacts of COVID-19	Some college or associate's degree	$50,000 - $74,999		6 County region	18-24	1	No	Yes, AA oversample	Female 18 thru 24	0.717294	0.654556	0.469509	0.730096	0.523693	0.698121	0.365601	0.394655	0.283084
1	28	Female	Hamilton County	No	No	Yes	No	No	No	Work full-time	Living with someone	No	No	Not at all concerned	Not at all concerned	Not at all concerned	Not at all concerned	Economic impacts of COVID-19	Some college or associate's degree	$50,000 - $74,999		6 County region	25-34	1	No	Yes, AA oversample	Female 25 thru 34	0.717294	0.911825	0.654046	0.730096	0.523693	0.854477	0.447484	0.857145	0.614825
1	61	Female	Shelby County	No	No	Yes	No	No	No	Retired	Married	No	Yes	Somewhat concerned	Somewhat concerned	Very concerned	Very concerned	Health impacts of COVID-19	Bachelor's degree or higher	$150,000 or more		6 County region	55-64	1	No	Yes, AA oversample	Female 55 thru 64	0.717294	0.850711	0.610209	0.730096	0.523693	0.862899	0.451894	1.04624	0.750462
1	18	Female	Hamilton County	No	No	Yes	No	No	No	Work full-time	Single	No	No	Extremely concerned	Extremely concerned	Extremely concerned	Extremely concerned	Health impacts of COVID-19	High school graduate or GED	$15,000 - $24,999		6 County region	18-24	1	No	Yes, AA oversample	Female 18 thru 24	0.717294	0.654556	0.469509	0.730096	0.523693	0.698121	0.365601	0.394655	0.283084
1	23	Male	Shelby County	No	No	Yes	No	No	No	Work part-time	Single	No	No	Extremely concerned	Very concerned	Very concerned	Very concerned	Health impacts of COVID-19	Some college or associate's degree	$50,000 - $74,999		6 County region	18-24	1	No	Yes, AA oversample	Male 18 thru 24	0.717294	1.23261	0.884145	0.730096	0.523693	1.24389	0.651415	0.8773	0.629282
1	46	Female	Davidson County	No	No	Yes	No	No	No	Work full-time	Married	No	No	Extremely concerned	Extremely concerned	Extremely concerned	Extremely concerned	Health impacts of COVID-19	Bachelor's degree or higher	$150,000 or more		6 County region	45-54	1	No	Yes, AA oversample	Female 45 thru 54	0.717294	0.817142	0.586131	0.730096	0.523693	0.850522	0.445413	0.900985	0.646271
1	46	Male	Davidson County	No	No	Yes	No	No	No	Work full-time	Married	Yes	No	Somewhat concerned		Somewhat concerned	Very concerned	Economic impacts of COVID-19	Some college or associate's degree	$100,000 - $149,999		6 County region	45-54	1	No	Yes, AA oversample	Male 45 thru 54	0.717294	1.2468	0.894324	0.730096	0.523693	1.43334	0.75063	1.51878	1.08941
1	36	Male	Shelby County	No	No	Yes	No	No	No	Work full-time	Single	No	No	Very concerned	Very concerned	Very concerned	Somewhat concerned	Health impacts of COVID-19	Bachelor's degree or higher	$50,000 - $74,999		6 County region	35-44	1	No	Yes, AA oversample	Male 35 thru 44	0.717294	1.00481	0.720747	0.730096	0.523693	0.954872	0.50006	1.07527	0.771287
1	42	Female	Shelby County	No	No	Yes	No	No	No	Looking for work	Single	Yes	No	Very concerned	Very concerned	Very concerned	Not very concerned	Health impacts of COVID-19	Some college or associate's degree	Less than $15,000		6 County region	35-44	1	No	Yes, AA oversample	Female 35 thru 44	0.717294	0.763453	0.54762	0.730096	0.523693	0.802961	0.420505	0.733349	0.526027
1	49	Male	Davidson County	No	No	Yes	No	No	No	Work full-time	Married	Yes	No	Very concerned	Extremely concerned	Very concerned	Very concerned	Health impacts of COVID-19	High school graduate or GED	$75,000 - $99,999		6 County region	45-54	1	No	Yes, AA oversample	Male 45 thru 54	0.717294	1.2468	0.894324	0.730096	0.523693	1.43334	0.75063	1.51878	1.08941
1	21	Female	Shelby County	No	No	Yes	No	No	No	Work full-time	Married	Yes	Yes	Very concerned	Extremely concerned	Very concerned	Extremely concerned	Health impacts of COVID-19	Some college or associate's degree	$150,000 or more		6 County region	18-24	1	No	Yes, AA oversample	Female 18 thru 24	0.717294	0.654556	0.469509	0.730096	0.523693	0.698121	0.365601	0.394655	0.283084
1	65	Female	Shelby County	No	No	Yes	No	No	No	Retired	Single	No	No	Not very concerned	Not very concerned	Somewhat concerned	Very concerned	Health impacts of COVID-19	Some college or associate's degree	$35,000 - $49,999		6 County region	65+	1	No	Yes, AA oversample	Female 65+	0.717294	1.01201	0.72591	0.730096	0.523693	1.05035	0.550059	1.47113	1.05523
1	33	Female	Shelby County	No	No	Yes	No	No	No	Work part-time	Single	Yes	No	Extremely concerned	Somewhat concerned	Very concerned	Extremely concerned	Health impacts of COVID-19	High school graduate or GED	$15,000 - $24,999		6 County region	25-34	1	No	Yes, AA oversample	Female 25 thru 34	0.717294	0.911825	0.654046	0.730096	0.523693	0.854477	0.447484	0.857145	0.614825
1	45	Male	Madison County	No	No	Yes	No	No	No	Work part-time	Living with someone	Yes	Yes	Very concerned	Very concerned	Very concerned	Extremely concerned	Health impacts of COVID-19	Some college or associate's degree	$15,000 - $24,999		6 County region	45-54	1	No	Yes, AA oversample	Male 45 thru 54	0.717294	1.2468	0.894324	0.730096	0.523693	1.43334	0.75063	1.51878	1.08941
1	32	Female	Shelby County	No	No	Yes	No	No	No	Unemployed	Single	Yes	Yes	Extremely concerned	Extremely concerned	Extremely concerned	Extremely concerned	Economic impacts of COVID-19	Some college or associate's degree	$35,000 - $49,999		6 County region	25-34	1	No	Yes, AA oversample	Female 25 thru 34	0.717294	0.911825	0.654046	0.730096	0.523693	0.854477	0.447484	0.857145	0.614825
1	18	Female	Davidson County	No	No	Yes	No	No	No	Unemployed	Single	No	No	Not very concerned	Not very concerned	Somewhat concerned	Extremely concerned	Economic impacts of COVID-19	High school graduate or GED	Less than $15,000		6 County region	18-24	1	No	Yes, AA oversample	Female 18 thru 24	0.717294	0.654556	0.469509	0.730096	0.523693	0.698121	0.365601	0.394655	0.283084
1	35	Female	Davidson County	No	No	Yes	No	No	No	Work full-time	Single	No	Yes	Extremely concerned	Very concerned	Extremely concerned	Extremely concerned	Health impacts of COVID-19	Bachelor's degree or higher	$75,000 - $99,999		6 County region	35-44	1	No	Yes, AA oversample	Female 35 thru 44	0.717294	0.763453	0.54762	0.730096	0.523693	0.802961	0.420505	0.733349	0.526027
1	49	Female	Davidson County	No	No	Yes	No	No	No	Work full-time	Divorced	No	Yes	Extremely concerned	Somewhat concerned	Very concerned	Extremely concerned	Economic impacts of COVID-19	High school graduate or GED	$35,000 - $49,999		6 County region	45-54	1	No	Yes, AA oversample	Female 45 thru 54	0.717294	0.817142	0.586131	0.730096	0.523693	0.850522	0.445413	0.900985	0.646271
1	49	Female	Shelby County	No	No	Yes	No	No	No	Unemployed	Separated	Yes	No	Extremely concerned	Extremely concerned	Extremely concerned	Extremely concerned	Economic impacts of COVID-19	High school graduate or GED	Less than $15,000		6 County region	45-54	1	No	Yes, AA oversample	Female 45 thru 54	0.717294	0.817142	0.586131	0.730096	0.523693	0.850522	0.445413	0.900985	0.646271
1	71	Female	Davidson County	No	No	Yes	No	No	No	Retired	Married	No	No	Somewhat concerned	Very concerned	Very concerned	Extremely concerned	Health impacts of COVID-19	Some college or associate's degree	$35,000 - $49,999		6 County region	65+	1	No	Yes, AA oversample	Female 65+	0.717294	1.01201	0.72591	0.730096	0.523693	1.05035	0.550059	1.47113	1.05523
1	31	Female	Shelby County	No	No	Yes	No	No	No	Work full-time	Dating	Yes	No	Very concerned	Very concerned	Extremely concerned	Extremely concerned	Economic impacts of COVID-19	Bachelor's degree or higher	$150,000 or more		6 County region	25-34	1	No	Yes, AA oversample	Female 25 thru 34	0.717294	0.911825	0.654046	0.730096	0.523693	0.854477	0.447484	0.857145	0.614825
1	25	Male	Hamilton County	No	No	Yes	No	No	No	Student	Single	No	No	Extremely concerned	Somewhat concerned	Somewhat concerned	Not at all concerned	Economic impacts of COVID-19	Bachelor's degree or higher	$50,000 - $74,999		6 County region	25-34	1	No	Yes, AA oversample	Male 25 thru 34	0.717294	1.42702	1.02359	0.730096	0.523693	1.31307	0.687645	1.15163	0.826056
1	23	Female	Shelby County	No	No	Yes	No	No	No	Work full-time	Married	No	No	Extremely concerned	Extremely concerned	Extremely concerned	Extremely concerned	Health impacts of COVID-19	Bachelor's degree or higher	$15,000 - $24,999		6 County region	18-24	1	No	Yes, AA oversample	Female 18 thru 24	0.717294	0.654556	0.469509	0.730096	0.523693	0.698121	0.365601	0.394655	0.283084
1	18	Male	Shelby County	No	No	Yes	No	No	No	Work part-time	Married	No	No	Very concerned	Somewhat concerned	Extremely concerned	Extremely concerned	Health impacts of COVID-19	High school graduate or GED	$25,000 - $34,999		6 County region	18-24	1	No	Yes, AA oversample	Male 18 thru 24	0.717294	1.23261	0.884145	0.730096	0.523693	1.24389	0.651415	0.8773	0.629282
1	60	Female	Davidson County	No	No	Yes	No	No	No	Unemployed	Single	No	No	Extremely concerned	Extremely concerned	Extremely concerned	Extremely concerned	Health impacts of COVID-19	Some college or associate's degree	Less than $15,000		6 County region	55-64	1	No	Yes, AA oversample	Female 55 thru 64	0.717294	0.850711	0.610209	0.730096	0.523693	0.862899	0.451894	1.04624	0.750462
1	66	Female	Shelby County	No	No	Yes	No	No	No	Retired	Separated	No	No	Not very concerned	Somewhat concerned	Not very concerned	Somewhat concerned	Economic impacts of COVID-19	Some college or associate's degree	$75,000 - $99,999		6 County region	65+	1	No	Yes, AA oversample	Female 65+	0.717294	1.01201	0.72591	0.730096	0.523693	1.05035	0.550059	1.47113	1.05523
1	52	Female	Shelby County	No	No	Yes	No	No	No	Retired	Married	No	Yes	Very concerned	Extremely concerned	Extremely concerned	Extremely concerned	Economic impacts of COVID-19	Less than high school graduate	$35,000 - $49,999		6 County region	45-54	1	No	Yes, AA oversample	Female 45 thru 54	0.717294	0.817142	0.586131	0.730096	0.523693	0.850522	0.445413	0.900985	0.646271
1	31	Male	Davidson County	No	No	Yes	No	No	No	Work full-time	Married	No	No	Somewhat concerned	Very concerned	Very concerned	Very concerned	Health impacts of COVID-19	Bachelor's degree or higher	$75,000 - $99,999		6 County region	25-34	1	No	Yes, AA oversample	Male 25 thru 34	0.717294	1.42702	1.02359	0.730096	0.523693	1.31307	0.687645	1.15163	0.826056
1	54	Female	Shelby County	No	No	Yes	No	No	No	Retired	Separated	No	No	Extremely concerned	Extremely concerned	Extremely concerned	Extremely concerned	Health impacts of COVID-19	Some college or associate's degree	Less than $15,000		6 County region	45-54	1	No	Yes, AA oversample	Female 45 thru 54	0.717294	0.817142	0.586131	0.730096	0.523693	0.850522	0.445413	0.900985	0.646271
1	62	Female	Hamilton County	No	No	Yes	No	No	No	Retired	Divorced	No	No	Not very concerned	Somewhat concerned	Somewhat concerned	Extremely concerned	Health impacts of COVID-19	Some college or associate's degree	Less than $15,000		6 County region	55-64	1	No	Yes, AA oversample	Female 55 thru 64	0.717294	0.850711	0.610209	0.730096	0.523693	0.862899	0.451894	1.04624	0.750462
1	58	Female	Shelby County	No	No	Yes	No	No	No	Retired	Dating	No	Yes	Extremely concerned	Extremely concerned	Extremely concerned	Extremely concerned	Economic impacts of COVID-19	Some college or associate's degree	Less than $15,000		6 County region	55-64	1	No	Yes, AA oversample	Female 55 thru 64	0.717294	0.850711	0.610209	0.730096	0.523693	0.862899	0.451894	1.04624	0.750462
1	20	Female	Shelby County	No	No	Yes	No	No	No	Student	Single	No	Yes	Extremely concerned	Very concerned	Very concerned	Very concerned	Health impacts of COVID-19	Some college or associate's degree	$50,000 - $74,999		6 County region	18-24	1	No	Yes, AA oversample	Female 18 thru 24	0.717294	0.654556	0.469509	0.730096	0.523693	0.698121	0.365601	0.394655	0.283084
1	52	Female	Davidson County	No	No	Yes	No	No	No	Unemployed	Single	No	Yes	Very concerned	Very concerned	Very concerned	Very concerned	Health impacts of COVID-19	Some college or associate's degree	Less than $15,000		6 County region	45-54	1	No	Yes, AA oversample	Female 45 thru 54	0.717294	0.817142	0.586131	0.730096	0.523693	0.850522	0.445413	0.900985	0.646271
1	34	Female	Madison County	No	No	Yes	No	No	No	Work full-time	Married	Yes	No	Somewhat concerned	Somewhat concerned	Very concerned	Extremely concerned	Health impacts of COVID-19	Bachelor's degree or higher	$150,000 or more		6 County region	25-34	1	No	Yes, AA oversample	Female 25 thru 34	0.717294	0.911825	0.654046	0.730096	0.523693	0.854477	0.447484	0.857145	0.614825
1	38	Male	Shelby County	No	No	Yes	No	No	No	Work full-time	Living with someone	Yes	No	Extremely concerned	Extremely concerned	Extremely concerned	Extremely concerned	Health impacts of COVID-19	Some college or associate's degree	$25,000 - $34,999		6 County region	35-44	1	No	Yes, AA oversample	Male 35 thru 44	0.717294	1.00481	0.720747	0.730096	0.523693	0.954872	0.50006	1.07527	0.771287
1	35	Female	Hamilton County	No	No	Yes	No	No	No	Work full-time	Single	Yes	No	Extremely concerned	Extremely concerned	Extremely concerned	Extremely concerned	Health impacts of COVID-19	Some college or associate's degree	$25,000 - $34,999		6 County region	35-44	1	No	Yes, AA oversample	Female 35 thru 44	0.717294	0.763453	0.54762	0.730096	0.523693	0.802961	0.420505	0.733349	0.526027
1	28	Female	Shelby County	No	No	Yes	No	No	No	Work full-time	Living with someone	Yes	No	Extremely concerned	Extremely concerned	Extremely concerned	Extremely concerned	Health impacts of COVID-19	Bachelor's degree or higher	$50,000 - $74,999		6 County region	25-34	1	No	Yes, AA oversample	Female 25 thru 34	0.717294	0.911825	0.654046	0.730096	0.523693	0.854477	0.447484	0.857145	0.614825
1	36	Male	Shelby County	No	No	Yes	No	No	No	Work full-time	Single	No	No	Very concerned	Not very concerned	Somewhat concerned	Somewhat concerned	Health impacts of COVID-19	Bachelor's degree or higher	$50,000 - $74,999		6 County region	35-44	1	No	Yes, AA oversample	Male 35 thru 44	0.717294	1.00481	0.720747	0.730096	0.523693	0.954872	0.50006	1.07527	0.771287
1	50	Female	Hamilton County	No	No	Yes	No	No	No	Student	Divorced	No	No	Not very concerned	Extremely concerned	Extremely concerned	Extremely concerned	Economic impacts of COVID-19	Some college or associate's degree	Less than $15,000		6 County region	45-54	1	No	Yes, AA oversample	Female 45 thru 54	0.717294	0.817142	0.586131	0.730096	0.523693	0.850522	0.445413	0.900985	0.646271
1	40	Male	Shelby County	No	No	Yes	No	No	No	Work full-time	Living with someone	Yes	No	Somewhat concerned	Extremely concerned	Very concerned	Somewhat concerned	Economic impacts of COVID-19	High school graduate or GED	$75,000 - $99,999		6 County region	35-44	1	No	Yes, AA oversample	Male 35 thru 44	0.717294	1.00481	0.720747	0.730096	0.523693	0.954872	0.50006	1.07527	0.771287
1	43	Female	Shelby County	No	No	Yes	No	No	No	Unemployed	Married	Yes	No	Extremely concerned	Extremely concerned	Extremely concerned	Extremely concerned	Health impacts of COVID-19	Some college or associate's degree	$35,000 - $49,999		6 County region	35-44	1	No	Yes, AA oversample	Female 35 thru 44	0.717294	0.763453	0.54762	0.730096	0.523693	0.802961	0.420505	0.733349	0.526027
1	18	Female	Shelby County	No	No	Yes	No	No	No	Work full-time	Single	No	Yes	Extremely concerned	Extremely concerned	Extremely concerned	Extremely concerned	Health impacts of COVID-19	High school graduate or GED	Less than $15,000		6 County region	18-24	1	No	Yes, AA oversample	Female 18 thru 24	0.717294	0.654556	0.469509	0.730096	0.523693	0.698121	0.365601	0.394655	0.283084
1	19	Female	Davidson County	No	No	Yes	No	No	No	Work part-time	Single	No	No	Extremely concerned	Extremely concerned	Extremely concerned	Very concerned	Health impacts of COVID-19	Some college or associate's degree	$50,000 - $74,999		6 County region	18-24	1	No	Yes, AA oversample	Female 18 thru 24	0.717294	0.654556	0.469509	0.730096	0.523693	0.698121	0.365601	0.394655	0.283084
1	32	Male	Shelby County	No	No	Yes	No	No	No	Student	Separated	No	No	Somewhat concerned	Extremely concerned	Very concerned	Somewhat concerned	Health impacts of COVID-19	High school graduate or GED	Less than $15,000		6 County region	25-34	1	No	Yes, AA oversample	Male 25 thru 34	0.717294	1.42702	1.02359	0.730096	0.523693	1.31307	0.687645	1.15163	0.826056
1	31	Female	Hamilton County	No	No	Yes	No	No	No	Unemployed	Single	No	No	Very concerned	Extremely concerned	Extremely concerned	Extremely concerned	Health impacts of COVID-19	High school graduate or GED	Less than $15,000		6 County region	25-34	1	No	Yes, AA oversample	Female 25 thru 34	0.717294	0.911825	0.654046	0.730096	0.523693	0.854477	0.447484	0.857145	0.614825
1	26	Female	Shelby County	No	No	Yes	No	No	No	Work full-time	Single	No	No	Somewhat concerned	Somewhat concerned	Extremely concerned	Very concerned	Health impacts of COVID-19	Bachelor's degree or higher	$25,000 - $34,999		6 County region	25-34	1	No	Yes, AA oversample	Female 25 thru 34	0.717294	0.911825	0.654046	0.730096	0.523693	0.854477	0.447484	0.857145	0.614825
1	42	Female	Shelby County	No	No	Yes	No	No	No	Stay-at-Home Caregiver	Divorced	Yes	No	Extremely concerned	Very concerned	Extremely concerned	Very concerned	Economic impacts of COVID-19	Bachelor's degree or higher	$15,000 - $24,999		6 County region	35-44	1	No	Yes, AA oversample	Female 35 thru 44	0.717294	0.763453	0.54762	0.730096	0.523693	0.802961	0.420505	0.733349	0.526027
1	56	Female	Davidson County	No	No	Yes	No	No	No	Work full-time	Dating	No	No	Extremely concerned	Extremely concerned	Extremely concerned	Extremely concerned	Economic impacts of COVID-19	Some college or associate's degree	$50,000 - $74,999		6 County region	55-64	1	No	Yes, AA oversample	Female 55 thru 64	0.717294	0.850711	0.610209	0.730096	0.523693	0.862899	0.451894	1.04624	0.750462
1	56	Female	Shelby County	No	No	Yes	No	No	No	Unemployed	Single	No	Yes	Extremely concerned	Extremely concerned	Extremely concerned	Extremely concerned	Health impacts of COVID-19	Some college or associate's degree	Less than $15,000		6 County region	55-64	1	No	Yes, AA oversample	Female 55 thru 64	0.717294	0.850711	0.610209	0.730096	0.523693	0.862899	0.451894	1.04624	0.750462
1	33	Female	Shelby County	No	No	Yes	No	No	No	Work full-time	Separated	No	No	Extremely concerned	Extremely concerned	Extremely concerned	Extremely concerned	Economic impacts of COVID-19	Less than high school graduate	Less than $15,000		6 County region	25-34	1	No	Yes, AA oversample	Female 25 thru 34	0.717294	0.911825	0.654046	0.730096	0.523693	0.854477	0.447484	0.857145	0.614825
1	24	Female	Knox County	No	No	Yes	No	No	No	Looking for work	Single	No	No	Somewhat concerned	Very concerned	Extremely concerned	Very concerned	Economic impacts of COVID-19	Bachelor's degree or higher	Less than $15,000		6 County region	18-24	1	No	Yes, AA oversample	Female 18 thru 24	0.717294	0.654556	0.469509	0.730096	0.523693	0.698121	0.365601	0.394655	0.283084
1	21	Female	Shelby County	No	No	Yes	No	No	No	Work part-time	Single	No	Yes	Somewhat concerned	Very concerned	Very concerned	Extremely concerned	Health impacts of COVID-19	Some college or associate's degree	$50,000 - $74,999		6 County region	18-24	1	No	Yes, AA oversample	Female 18 thru 24	0.717294	0.654556	0.469509	0.730096	0.523693	0.698121	0.365601	0.394655	0.283084
1	20	Female	Shelby County	No	No	Yes	No	Yes	No	Work full-time	Separated	No	No	Not very concerned	Very concerned	Somewhat concerned	Very concerned	Health impacts of COVID-19	Some college or associate's degree	$25,000 - $34,999		6 County region	18-24	2	No	Yes, AA oversample	Female 18 thru 24	0.717294	0.654556	0.469509	0.730096	0.523693	0.698121	0.365601	0.394655	0.283084
1	30	Male	Shelby County	No	No	Yes	No	No	No	Work full-time	Single	No	No	Somewhat concerned	Not very concerned	Not very concerned	Extremely concerned	Health impacts of COVID-19	Some college or associate's degree	$25,000 - $34,999		6 County region	25-34	1	No	Yes, AA oversample	Male 25 thru 34	0.717294	1.42702	1.02359	0.730096	0.523693	1.31307	0.687645	1.15163	0.826056
1	26	Male	Shelby County	No	No	Yes	No	No	No	Work part-time	Single	No	Yes	Extremely concerned	Extremely concerned	Extremely concerned	Extremely concerned	Economic impacts of COVID-19	High school graduate or GED	$50,000 - $74,999		6 County region	25-34	1	No	Yes, AA oversample	Male 25 thru 34	0.717294	1.42702	1.02359	0.730096	0.523693	1.31307	0.687645	1.15163	0.826056
1	22	Male	Shelby County	No	No	Yes	No	No	No	Unemployed	Separated	No	Yes	Very concerned	Extremely concerned	Extremely concerned	Extremely concerned	Economic impacts of COVID-19	High school graduate or GED	$35,000 - $49,999		6 County region	18-24	1	No	Yes, AA oversample	Male 18 thru 24	0.717294	1.23261	0.884145	0.730096	0.523693	1.24389	0.651415	0.8773	0.629282
1	53	Male	Shelby County	No	No	Yes	No	No	No	Work part-time	Married	Yes	Yes	Somewhat concerned	Very concerned	Very concerned	Very concerned	Health impacts of COVID-19	Some college or associate's degree	$35,000 - $49,999		6 County region	45-54	1	No	Yes, AA oversample	Male 45 thru 54	0.717294	1.2468	0.894324	0.730096	0.523693	1.43334	0.75063	1.51878	1.08941
1	37	Female	Shelby County	No	No	Yes	No	No	No	Stay-at-Home Caregiver	Married	Yes	Yes	Very concerned	Extremely concerned	Somewhat concerned	Very concerned	Economic impacts of COVID-19	High school graduate or GED	Less than $15,000		6 County region	35-44	1	No	Yes, AA oversample	Female 35 thru 44	0.717294	0.763453	0.54762	0.730096	0.523693	0.802961	0.420505	0.733349	0.526027
1	34	Female	Shelby County	No	No	Yes	No	No	No	Work full-time	Married	Yes	No	Very concerned	Extremely concerned	Extremely concerned	Extremely concerned	Health impacts of COVID-19	Some college or associate's degree	$50,000 - $74,999		6 County region	25-34	1	No	Yes, AA oversample	Female 25 thru 34	0.717294	0.911825	0.654046	0.730096	0.523693	0.854477	0.447484	0.857145	0.614825
1	46	Female	Shelby County	No	No	Yes	No	No	No	Work part-time	Divorced	No	No	Extremely concerned	Extremely concerned	Extremely concerned	Extremely concerned	Economic impacts of COVID-19	High school graduate or GED	$35,000 - $49,999		6 County region	45-54	1	No	Yes, AA oversample	Female 45 thru 54	0.717294	0.817142	0.586131	0.730096	0.523693	0.850522	0.445413	0.900985	0.646271
1	45	Male	Shelby County	No	No	Yes	No	No	No	Work full-time	Divorced	No	No	Not very concerned	Not very concerned	Not very concerned	Somewhat concerned	Health impacts of COVID-19	High school graduate or GED	$50,000 - $74,999		6 County region	45-54	1	No	Yes, AA oversample	Male 45 thru 54	0.717294	1.2468	0.894324	0.730096	0.523693	1.43334	0.75063	1.51878	1.08941
1	53	Female	Madison County	No	No	Yes	No	No	No	Work full-time	Single	Yes	Yes	Extremely concerned	Extremely concerned	Extremely concerned	Very concerned	Economic impacts of COVID-19	High school graduate or GED	Less than $15,000		6 County region	45-54	1	No	Yes, AA oversample	Female 45 thru 54	0.717294	0.817142	0.586131	0.730096	0.523693	0.850522	0.445413	0.900985	0.646271
1	51	Female	Shelby County	No	No	Yes	No	No	No	Work full-time	Single	No	Yes	Somewhat concerned	Extremely concerned	Extremely concerned	Extremely concerned	Health impacts of COVID-19	Some college or associate's degree	$35,000 - $49,999		6 County region	45-54	1	No	Yes, AA oversample	Female 45 thru 54	0.717294	0.817142	0.586131	0.730096	0.523693	0.850522	0.445413	0.900985	0.646271
1	39	Female	Shelby County	No	No	Yes	No	No	No	Work full-time	Single	No	No	Somewhat concerned	Very concerned	Extremely concerned	Extremely concerned	Health impacts of COVID-19	Bachelor's degree or higher	$50,000 - $74,999		6 County region	35-44	1	No	Yes, AA oversample	Female 35 thru 44	0.717294	0.763453	0.54762	0.730096	0.523693	0.802961	0.420505	0.733349	0.526027
1	36	Female	Madison County	No	No	Yes	No	No	No	Stay-at-Home Caregiver	Single	Yes	Yes	Very concerned	Very concerned	Very concerned	Somewhat concerned	Health impacts of COVID-19	Bachelor's degree or higher	$25,000 - $34,999		6 County region	35-44	1	No	Yes, AA oversample	Female 35 thru 44	0.717294	0.763453	0.54762	0.730096	0.523693	0.802961	0.420505	0.733349	0.526027
1	20	Female	Shelby County	Yes	No	Yes	No	No	No	Work part-time	Dating	No	Yes	Somewhat concerned	Somewhat concerned	Somewhat concerned	Somewhat concerned	Health impacts of COVID-19	Some college or associate's degree	$35,000 - $49,999		6 County region	18-24	2	No	Yes, AA oversample	Female 18 thru 24	0.717294	0.654556	0.469509	0.730096	0.523693	0.698121	0.365601	0.394655	0.283084
1	52	Female	Shelby County	No	No	Yes	No	No	No	Work full-time	Married	No	No	Somewhat concerned	Somewhat concerned	Very concerned	Extremely concerned	Health impacts of COVID-19	Bachelor's degree or higher	$150,000 or more		6 County region	45-54	1	No	Yes, AA oversample	Female 45 thru 54	0.717294	0.817142	0.586131	0.730096	0.523693	0.850522	0.445413	0.900985	0.646271
1	29	Male	Shelby County	No	No	Yes	No	No	No	Unemployed	Living with someone	No	No	Not at all concerned	Not at all concerned	Not at all concerned	Not at all concerned	Health impacts of COVID-19	Some college or associate's degree	$15,000 - $24,999		6 County region	25-34	1	No	Yes, AA oversample	Male 25 thru 34	0.717294	1.42702	1.02359	0.730096	0.523693	1.31307	0.687645	1.15163	0.826056
1	27	Female	Davidson County	No	No	Yes	No	No	No	Work full-time	Single	Yes	No	Extremely concerned	Extremely concerned	Very concerned	Very concerned	Health impacts of COVID-19	Bachelor's degree or higher	$15,000 - $24,999		6 County region	25-34	1	No	Yes, AA oversample	Female 25 thru 34	0.717294	0.911825	0.654046	0.730096	0.523693	0.854477	0.447484	0.857145	0.614825
1	34	Female	Shelby County	No	No	Yes	No	No	No	Work full-time	Dating	No	Yes	Somewhat concerned	Extremely concerned	Extremely concerned	Very concerned	Economic impacts of COVID-19	Bachelor's degree or higher	$75,000 - $99,999		6 County region	25-34	1	No	Yes, AA oversample	Female 25 thru 34	0.717294	0.911825	0.654046	0.730096	0.523693	0.854477	0.447484	0.857145	0.614825
1	18	Female	Shelby County	No	No	Yes	No	No	No	Work full-time	Single	No	No	Not very concerned	Somewhat concerned	Somewhat concerned	Somewhat concerned	Economic impacts of COVID-19	High school graduate or GED	$15,000 - $24,999		6 County region	18-24	1	No	Yes, AA oversample	Female 18 thru 24	0.717294	0.654556	0.469509	0.730096	0.523693	0.698121	0.365601	0.394655	0.283084
1	42	Female	Shelby County	No	No	Yes	Yes	No	No	Unemployed	Married	Yes	No	Not very concerned	Not very concerned	Not very concerned	Extremely concerned	Health impacts of COVID-19	Bachelor's degree or higher	$100,000 - $149,999		6 County region	35-44	2	No	Yes, AA oversample	Female 35 thru 44	0.717294	0.763453	0.54762	0.730096	0.523693	0.802961	0.420505	0.733349	0.526027
1	27	Male	Shelby County	No	No	Yes	No	No	No	Looking for work	Dating	No	Yes	Not very concerned	Extremely concerned	Very concerned	Somewhat concerned	Economic impacts of COVID-19	High school graduate or GED	Less than $15,000		6 County region	25-34	1	No	Yes, AA oversample	Male 25 thru 34	0.717294	1.42702	1.02359	0.730096	0.523693	1.31307	0.687645	1.15163	0.826056
1	19	Female	Shelby County	No	No	Yes	No	No	No	Work part-time	Single	Yes	Yes	Somewhat concerned	Somewhat concerned	Somewhat concerned	Extremely concerned	Health impacts of COVID-19	Some college or associate's degree	$100,000 - $149,999		6 County region	18-24	1	No	Yes, AA oversample	Female 18 thru 24	0.717294	0.654556	0.469509	0.730096	0.523693	0.698121	0.365601	0.394655	0.283084
1	22	Female	Shelby County	No	No	Yes	No	No	No	Work part-time	Single	No	No	Somewhat concerned	Somewhat concerned	Somewhat concerned	Extremely concerned	Economic impacts of COVID-19	High school graduate or GED	$25,000 - $34,999		6 County region	18-24	1	No	Yes, AA oversample	Female 18 thru 24	0.717294	0.654556	0.469509	0.730096	0.523693	0.698121	0.365601	0.394655	0.283084
1	24	Female	Hamilton County	No	No	Yes	Yes	No	No	Work full-time	Dating	Yes	No	Extremely concerned	Extremely concerned	Extremely concerned	Very concerned	Health impacts of COVID-19	Less than high school graduate	$35,000 - $49,999		6 County region	18-24	2	No	Yes, AA oversample	Female 18 thru 24	0.717294	0.654556	0.469509	0.730096	0.523693	0.698121	0.365601	0.394655	0.283084
1	55	Female	Shelby County	No	No	Yes	No	No	No	Work full-time	Married	No	No	Extremely concerned	Extremely concerned	Extremely concerned	Extremely concerned	Economic impacts of COVID-19	High school graduate or GED	$15,000 - $24,999		6 County region	55-64	1	No	Yes, AA oversample	Female 55 thru 64	0.717294	0.850711	0.610209	0.730096	0.523693	0.862899	0.451894	1.04624	0.750462
1	38	Female	Madison County	No	No	Yes	No	No	No	Work full-time	Single	No	No	Very concerned	Very concerned	Extremely concerned	Very concerned	Economic impacts of COVID-19	High school graduate or GED	$25,000 - $34,999		6 County region	35-44	1	No	Yes, AA oversample	Female 35 thru 44	0.717294	0.763453	0.54762	0.730096	0.523693	0.802961	0.420505	0.733349	0.526027
1	41	Female	Shelby County	No	No	Yes	No	No	No	Work full-time	Single	No	No	Not at all concerned	Not at all concerned	Not at all concerned	Extremely concerned	Economic impacts of COVID-19	Bachelor's degree or higher	$75,000 - $99,999		6 County region	35-44	1	No	Yes, AA oversample	Female 35 thru 44	0.717294	0.763453	0.54762	0.730096	0.523693	0.802961	0.420505	0.733349	0.526027
1	20	Male	Davidson County	No	No	Yes	No	No	No	Work full-time	Single	No	No	Extremely concerned	Extremely concerned	Extremely concerned	Somewhat concerned	Health impacts of COVID-19	Bachelor's degree or higher	$35,000 - $49,999		6 County region	18-24	1	No	Yes, AA oversample	Male 18 thru 24	0.717294	1.23261	0.884145	0.730096	0.523693	1.24389	0.651415	0.8773	0.629282
1	47	Female	Shelby County	No	No	Yes	No	No	No	Work part-time	Married	Yes	No	Somewhat concerned	Not very concerned	Not very concerned	Somewhat concerned	Health impacts of COVID-19	Some college or associate's degree	$75,000 - $99,999		6 County region	45-54	1	No	Yes, AA oversample	Female 45 thru 54	0.717294	0.817142	0.586131	0.730096	0.523693	0.850522	0.445413	0.900985	0.646271
1	22	Female	Davidson County	No	No	Yes	No	No	No	Work full-time	Single	No	Yes	Very concerned	Extremely concerned	Extremely concerned	Extremely concerned	Economic impacts of COVID-19	Some college or associate's degree	Less than $15,000		6 County region	18-24	1	No	Yes, AA oversample	Female 18 thru 24	0.717294	0.654556	0.469509	0.730096	0.523693	0.698121	0.365601	0.394655	0.283084
1	51	Male	Shelby County	No	No	Yes	No	No	No	Stay-at-Home Caregiver	Single	No	No	Extremely concerned	Extremely concerned	Very concerned	Extremely concerned	Health impacts of COVID-19	Some college or associate's degree	$35,000 - $49,999		6 County region	45-54	1	No	Yes, AA oversample	Male 45 thru 54	0.717294	1.2468	0.894324	0.730096	0.523693	1.43334	0.75063	1.51878	1.08941
1	72	Female	Davidson County	No	No	Yes	No	No	No	Retired	Married	No	Yes	Somewhat concerned	Somewhat concerned	Very concerned	Extremely concerned	Health impacts of COVID-19	Bachelor's degree or higher	$35,000 - $49,999		6 County region	65+	1	No	Yes, AA oversample	Female 65+	0.717294	1.01201	0.72591	0.730096	0.523693	1.05035	0.550059	1.47113	1.05523
1	23	Female	Shelby County	No	No	Yes	No	No	No	Work part-time	Dating	No	No	Somewhat concerned	Somewhat concerned	Extremely concerned	Extremely concerned	Health impacts of COVID-19	High school graduate or GED	$50,000 - $74,999		6 County region	18-24	1	No	Yes, AA oversample	Female 18 thru 24	0.717294	0.654556	0.469509	0.730096	0.523693	0.698121	0.365601	0.394655	0.283084
1	24	Male	Knox County	No	No	Yes	No	No	No	Unemployed	Divorced	No	No	Very concerned	Very concerned	Extremely concerned	Not very concerned	Health impacts of COVID-19	High school graduate or GED	$25,000 - $34,999		6 County region	18-24	1	No	Yes, AA oversample	Male 18 thru 24	0.717294	1.23261	0.884145	0.730096	0.523693	1.24389	0.651415	0.8773	0.629282
1	56	Male	Davidson County	No	No	Yes	No	No	No	Work full-time	Single	No	Yes	Extremely concerned	Extremely concerned	Extremely concerned	Extremely concerned	Health impacts of COVID-19	High school graduate or GED	$25,000 - $34,999		6 County region	55-64	1	No	Yes, AA oversample	Male 55 thru 65	0.717294	1.15827	0.830822	0.730096	0.523693	1.10949	0.581034	5.59077	4.01022
1	18	Female	Shelby County	No	No	Yes	No	No	No	Looking for work	Single	Yes	No	Extremely concerned	Extremely concerned	Extremely concerned	Extremely concerned	Health impacts of COVID-19	Less than high school graduate	Less than $15,000		6 County region	18-24	1	No	Yes, AA oversample	Female 18 thru 24	0.717294	0.654556	0.469509	0.730096	0.523693	0.698121	0.365601	0.394655	0.283084
1	34	Male	Shelby County	No	No	Yes	No	No	No	Work full-time	Dating	No	No	Very concerned	Extremely concerned	Extremely concerned	Extremely concerned	Economic impacts of COVID-19	Some college or associate's degree	$25,000 - $34,999		6 County region	25-34	1	No	Yes, AA oversample	Male 25 thru 34	0.717294	1.42702	1.02359	0.730096	0.523693	1.31307	0.687645	1.15163	0.826056
1	50	Female	Shelby County	No	No	Yes	No	No	No	Work full-time	Married	No	Yes	Somewhat concerned	Somewhat concerned	Somewhat concerned	Somewhat concerned	Economic impacts of COVID-19	Some college or associate's degree	$75,000 - $99,999		6 County region	45-54	1	No	Yes, AA oversample	Female 45 thru 54	0.717294	0.817142	0.586131	0.730096	0.523693	0.850522	0.445413	0.900985	0.646271
1	18	Female	Shelby County	No	No	Yes	No	No	No	Student	Single	No	No	Not very concerned	Not very concerned	Not very concerned	Extremely concerned	Health impacts of COVID-19	Less than high school graduate	$100,000 - $149,999		6 County region	18-24	1	No	Yes, AA oversample	Female 18 thru 24	0.717294	0.654556	0.469509	0.730096	0.523693	0.698121	0.365601	0.394655	0.283084
1	18	Female	Shelby County	No	No	Yes	No	No	No	Looking for work	Single	Yes	No	Not very concerned	Very concerned	Extremely concerned	Extremely concerned	Economic impacts of COVID-19	High school graduate or GED	$15,000 - $24,999		6 County region	18-24	1	No	Yes, AA oversample	Female 18 thru 24	0.717294	0.654556	0.469509	0.730096	0.523693	0.698121	0.365601	0.394655	0.283084
1	43	Male	Shelby County	No	No	Yes	No	No	No	Work full-time	Married	Yes	No	Extremely concerned	Extremely concerned	Extremely concerned	Extremely concerned	Health impacts of COVID-19	High school graduate or GED	$35,000 - $49,999		6 County region	35-44	1	No	Yes, AA oversample	Male 35 thru 44	0.717294	1.00481	0.720747	0.730096	0.523693	0.954872	0.50006	1.07527	0.771287
1	18	Female	Shelby County	No	No	Yes	No	No	No	Student	Single	Yes	Yes	Somewhat concerned	Somewhat concerned	Very concerned	Somewhat concerned	Economic impacts of COVID-19	High school graduate or GED	$50,000 - $74,999		6 County region	18-24	1	No	Yes, AA oversample	Female 18 thru 24	0.717294	0.654556	0.469509	0.730096	0.523693	0.698121	0.365601	0.394655	0.283084
1	22	Female	Shelby County	No	No	Yes	No	No	No	Student	Single	No	No	Somewhat concerned	Not very concerned	Very concerned	Very concerned	Economic impacts of COVID-19	Bachelor's degree or higher	$100,000 - $149,999		6 County region	18-24	1	No	Yes, AA oversample	Female 18 thru 24	0.717294	0.654556	0.469509	0.730096	0.523693	0.698121	0.365601	0.394655	0.283084
1	40	Male	Madison County	No	No	Yes	No	No	No	Work full-time	Divorced	Yes	Yes	Somewhat concerned	Extremely concerned	Extremely concerned	Very concerned	Health impacts of COVID-19	Less than high school graduate	Less than $15,000		6 County region	35-44	1	No	Yes, AA oversample	Male 35 thru 44	0.717294	1.00481	0.720747	0.730096	0.523693	0.954872	0.50006	1.07527	0.771287
1	56	Female	Shelby County	No	No	Yes	No	No	No	Work full-time	Married	No	Yes	Extremely concerned	Very concerned	Extremely concerned	Extremely concerned	Health impacts of COVID-19	Bachelor's degree or higher	$50,000 - $74,999		6 County region	55-64	1	No	Yes, AA oversample	Female 55 thru 64	0.717294	0.850711	0.610209	0.730096	0.523693	0.862899	0.451894	1.04624	0.750462
1	25	Female	Davidson County	No	No	Yes	No	No	No	Work full-time	Single	No	No	Somewhat concerned	Extremely concerned	Extremely concerned	Extremely concerned	Economic impacts of COVID-19	Some college or associate's degree	$15,000 - $24,999		6 County region	25-34	1	No	Yes, AA oversample	Female 25 thru 34	0.717294	0.911825	0.654046	0.730096	0.523693	0.854477	0.447484	0.857145	0.614825
1	37	Female	Shelby County	No	No	Yes	No	No	No	Work full-time	Single	No	No	Somewhat concerned	Very concerned	Very concerned	Very concerned	Health impacts of COVID-19	Bachelor's degree or higher	$50,000 - $74,999		6 County region	35-44	1	No	Yes, AA oversample	Female 35 thru 44	0.717294	0.763453	0.54762	0.730096	0.523693	0.802961	0.420505	0.733349	0.526027
1	70	Female	Shelby County	No	No	Yes	No	No	No	Retired	Married	No	No	Very concerned	Extremely concerned	Extremely concerned	Extremely concerned	Health impacts of COVID-19	Bachelor's degree or higher	Less than $15,000		6 County region	65+	1	No	Yes, AA oversample	Female 65+	0.717294	1.01201	0.72591	0.730096	0.523693	1.05035	0.550059	1.47113	1.05523
1	19	Female	Shelby County	No	No	Yes	No	No	No	Work full-time	Single	No	No	Extremely concerned	Extremely concerned	Extremely concerned	Extremely concerned	Health impacts of COVID-19	Less than high school graduate	Less than $15,000		6 County region	18-24	1	No	Yes, AA oversample	Female 18 thru 24	0.717294	0.654556	0.469509	0.730096	0.523693	0.698121	0.365601	0.394655	0.283084
1	18	Male	Shelby County	No	No	Yes	No	No	No	Student	Single	No	No	Not at all concerned	Somewhat concerned	Not at all concerned	Somewhat concerned	Health impacts of COVID-19	Some college or associate's degree	Less than $15,000		6 County region	18-24	1	No	Yes, AA oversample	Male 18 thru 24	0.717294	1.23261	0.884145	0.730096	0.523693	1.24389	0.651415	0.8773	0.629282
1	35	Female	Shelby County	No	No	Yes	No	No	No	Work full-time	Single	No	No	Somewhat concerned	Somewhat concerned	Extremely concerned	Extremely concerned	Economic impacts of COVID-19	Some college or associate's degree	$35,000 - $49,999		6 County region	35-44	1	No	Yes, AA oversample	Female 35 thru 44	0.717294	0.763453	0.54762	0.730096	0.523693	0.802961	0.420505	0.733349	0.526027
1	59	Female	Davidson County	No	No	Yes	No	Yes	No	Work full-time	Single	No	No	Not very concerned	Not very concerned	Not very concerned	Somewhat concerned	Economic impacts of COVID-19	Bachelor's degree or higher	$75,000 - $99,999		6 County region	55-64	2	No	Yes, AA oversample	Female 55 thru 64	0.717294	0.850711	0.610209	0.730096	0.523693	0.862899	0.451894	1.04624	0.750462
1	18	Male	Hamilton County	No	No	Yes	No	No	No	Student	Single	No	Yes	Not at all concerned	Not at all concerned	Not at all concerned	Not at all concerned	Economic impacts of COVID-19	High school graduate or GED	$50,000 - $74,999		6 County region	18-24	1	No	Yes, AA oversample	Male 18 thru 24	0.717294	1.23261	0.884145	0.730096	0.523693	1.24389	0.651415	0.8773	0.629282
1	35	Female	Shelby County	No	No	Yes	No	No	No	Work full-time	Dating	No	No	Extremely concerned	Extremely concerned	Extremely concerned	Extremely concerned	Health impacts of COVID-19	Some college or associate's degree	$50,000 - $74,999		6 County region	35-44	1	No	Yes, AA oversample	Female 35 thru 44	0.717294	0.763453	0.54762	0.730096	0.523693	0.802961	0.420505	0.733349	0.526027
1	21	Male	Shelby County	No	No	Yes	No	No	No	Work part-time	Single	Yes	Yes	Very concerned	Extremely concerned	Extremely concerned	Very concerned	Health impacts of COVID-19	Less than high school graduate	Less than $15,000		6 County region	18-24	1	No	Yes, AA oversample	Male 18 thru 24	0.717294	1.23261	0.884145	0.730096	0.523693	1.24389	0.651415	0.8773	0.629282
1	25	Female	Shelby County	No	No	Yes	No	No	No	Work full-time	Single	No	No	Somewhat concerned	Somewhat concerned	Not very concerned	Not very concerned	Economic impacts of COVID-19	High school graduate or GED	Less than $15,000		6 County region	25-34	1	No	Yes, AA oversample	Female 25 thru 34	0.717294	0.911825	0.654046	0.730096	0.523693	0.854477	0.447484	0.857145	0.614825
1	33	Female	Shelby County	No	No	Yes	No	No	No	Work full-time	Married	Yes	No	Extremely concerned	Extremely concerned	Extremely concerned	Extremely concerned	Health impacts of COVID-19	Bachelor's degree or higher	$50,000 - $74,999		6 County region	25-34	1	No	Yes, AA oversample	Female 25 thru 34	0.717294	0.911825	0.654046	0.730096	0.523693	0.854477	0.447484	0.857145	0.614825
1	53	Female	Shelby County	No	No	Yes	No	No	No	Work full-time	Married	Yes	Yes	Extremely concerned	Extremely concerned	Extremely concerned	Extremely concerned	Health impacts of COVID-19	Bachelor's degree or higher	$50,000 - $74,999		6 County region	45-54	1	No	Yes, AA oversample	Female 45 thru 54	0.717294	0.817142	0.586131	0.730096	0.523693	0.850522	0.445413	0.900985	0.646271
1	18	Male	Shelby County	No	No	Yes	No	No	No	Work full-time	Dating	No	No	Very concerned	Extremely concerned	Extremely concerned	Extremely concerned	Economic impacts of COVID-19	Bachelor's degree or higher	$50,000 - $74,999		6 County region	18-24	1	No	Yes, AA oversample	Male 18 thru 24	0.717294	1.23261	0.884145	0.730096	0.523693	1.24389	0.651415	0.8773	0.629282
1	46	Female	Shelby County	No	No	Yes	No	No	No	Stay-at-Home Caregiver	Single	No	Yes	Extremely concerned	Very concerned	Very concerned	Very concerned	Economic impacts of COVID-19	High school graduate or GED	$15,000 - $24,999		6 County region	45-54	1	No	Yes, AA oversample	Female 45 thru 54	0.717294	0.817142	0.586131	0.730096	0.523693	0.850522	0.445413	0.900985	0.646271
1	18	Female	Davidson County	No	No	Yes	No	No	No	Looking for work	Dating	Yes	No	Not very concerned	Extremely concerned	Extremely concerned	Extremely concerned	Economic impacts of COVID-19	High school graduate or GED	Less than $15,000		6 County region	18-24	1	No	Yes, AA oversample	Female 18 thru 24	0.717294	0.654556	0.469509	0.730096	0.523693	0.698121	0.365601	0.394655	0.283084
1	20	Female	Shelby County	No	No	Yes	No	No	No	Work full-time	Dating	No	No	Not at all concerned	Somewhat concerned	Very concerned	Extremely concerned	Health impacts of COVID-19	Bachelor's degree or higher	Less than $15,000		6 County region	18-24	1	No	Yes, AA oversample	Female 18 thru 24	0.717294	0.654556	0.469509	0.730096	0.523693	0.698121	0.365601	0.394655	0.283084
1	18	Female	Shelby County	No	No	Yes	No	No	No	Work part-time	Single	Yes	Yes	Very concerned	Somewhat concerned	Somewhat concerned	Somewhat concerned	Economic impacts of COVID-19	Less than high school graduate	$25,000 - $34,999		6 County region	18-24	1	No	Yes, AA oversample	Female 18 thru 24	0.717294	0.654556	0.469509	0.730096	0.523693	0.698121	0.365601	0.394655	0.283084
1	21	Male	Knox County	No	No	Yes	No	No	No	Stay-at-Home Caregiver	Single	Yes	Yes	Extremely concerned	Very concerned	Very concerned	Very concerned	Health impacts of COVID-19	High school graduate or GED	$15,000 - $24,999		6 County region	18-24	1	No	Yes, AA oversample	Male 18 thru 24	0.717294	1.23261	0.884145	0.730096	0.523693	1.24389	0.651415	0.8773	0.629282
1	20	Female	Madison County	No	No	Yes	No	No	No	Work full-time	Single	Yes	No	Very concerned	Extremely concerned	Somewhat concerned	Very concerned	Economic impacts of COVID-19	High school graduate or GED	$15,000 - $24,999		6 County region	18-24	1	No	Yes, AA oversample	Female 18 thru 24	0.717294	0.654556	0.469509	0.730096	0.523693	0.698121	0.365601	0.394655	0.283084
1	46	Male	Davidson County	No	No	Yes	No	No	No	Retired	Living with someone	No	No	Not very concerned	Not very concerned	Somewhat concerned	Extremely concerned	Economic impacts of COVID-19	Some college or associate's degree	Less than $15,000		6 County region	45-54	1	No	Yes, AA oversample	Male 45 thru 54	0.717294	1.2468	0.894324	0.730096	0.523693	1.43334	0.75063	1.51878	1.08941
1	18	Female	Knox County	No	No	Yes	No	No	No	Unemployed	Living with someone	Yes	No	Extremely concerned	Somewhat concerned	Extremely concerned	Not very concerned	Health impacts of COVID-19	Bachelor's degree or higher	$35,000 - $49,999		6 County region	18-24	1	No	Yes, AA oversample	Female 18 thru 24	0.717294	0.654556	0.469509	0.730096	0.523693	0.698121	0.365601	0.394655	0.283084
1	40	Male	Shelby County	No	No	Yes	No	No	No	Work full-time	Married	No	No	Very concerned	Somewhat concerned	Very concerned	Extremely concerned	Health impacts of COVID-19	High school graduate or GED	$25,000 - $34,999		6 County region	35-44	1	No	Yes, AA oversample	Male 35 thru 44	0.717294	1.00481	0.720747	0.730096	0.523693	0.954872	0.50006	1.07527	0.771287
1	37	Male	Shelby County	No	No	Yes	No	No	No	Work full-time	Married	Yes	No	Very concerned	Extremely concerned	Extremely concerned	Very concerned	Economic impacts of COVID-19	Some college or associate's degree	$75,000 - $99,999		6 County region	35-44	1	No	Yes, AA oversample	Male 35 thru 44	0.717294	1.00481	0.720747	0.730096	0.523693	0.954872	0.50006	1.07527	0.771287
1	57	Male	Davidson County	No	No	Yes	No	No	No	Work full-time	Married	No	No	Extremely concerned	Extremely concerned	Extremely concerned	Extremely concerned	Economic impacts of COVID-19	Bachelor's degree or higher	$150,000 or more		6 County region	55-64	1	No	Yes, AA oversample	Male 55 thru 65	0.717294	1.15827	0.830822	0.730096	0.523693	1.10949	0.581034	5.59077	4.01022
1	32	Female	Davidson County	No	No	Yes	No	No	No	Unemployed	Single	Yes	No	Somewhat concerned	Somewhat concerned	Very concerned	Very concerned	Economic impacts of COVID-19	Some college or associate's degree	Less than $15,000		6 County region	25-34	1	No	Yes, AA oversample	Female 25 thru 34	0.717294	0.911825	0.654046	0.730096	0.523693	0.854477	0.447484	0.857145	0.614825
1	44	Female	Shelby County	No	No	Yes	No	No	No	Work full-time	Married	No	Yes	Not at all concerned	Not very concerned	Somewhat concerned		Economic impacts of COVID-19	Bachelor's degree or higher	$100,000 - $149,999		6 County region	35-44	1	No	Yes, AA oversample	Female 35 thru 44	0.717294	0.763453	0.54762	0.730096	0.523693	0.802961	0.420505	0.733349	0.526027
1	25	Male	Shelby County	No	No	Yes	No	No	No	Work full-time	Separated	No	No	Very concerned	Very concerned	Extremely concerned	Very concerned	Health impacts of COVID-19	High school graduate or GED	$15,000 - $24,999		6 County region	25-34	1	No	Yes, AA oversample	Male 25 thru 34	0.717294	1.42702	1.02359	0.730096	0.523693	1.31307	0.687645	1.15163	0.826056
1	49	Female	Davidson County	No	No	Yes	No	No	No	Unemployed	Single	No	No	Somewhat concerned	Very concerned	Very concerned	Very concerned	Health impacts of COVID-19	High school graduate or GED	$15,000 - $24,999		6 County region	45-54	1	No	Yes, AA oversample	Female 45 thru 54	0.717294	0.817142	0.586131	0.730096	0.523693	0.850522	0.445413	0.900985	0.646271
1	18	Female	Shelby County	No	No	Yes	No	No	No	Student	Single	Yes	No	Not at all concerned	Very concerned	Very concerned	Very concerned	Economic impacts of COVID-19	High school graduate or GED	$50,000 - $74,999		6 County region	18-24	1	No	Yes, AA oversample	Female 18 thru 24	0.717294	0.654556	0.469509	0.730096	0.523693	0.698121	0.365601	0.394655	0.283084
1	37	Female	Davidson County	No	No	Yes	No	No	No	Stay-at-Home Caregiver	Single	Yes	No	Very concerned	Extremely concerned	Extremely concerned	Extremely concerned	Economic impacts of COVID-19	Some college or associate's degree	Less than $15,000		6 County region	35-44	1	No	Yes, AA oversample	Female 35 thru 44	0.717294	0.763453	0.54762	0.730096	0.523693	0.802961	0.420505	0.733349	0.526027
1	47	Female	Davidson County	No	No	Yes	No	No	No	Unemployed	Divorced	No	No	Not very concerned	Extremely concerned	Extremely concerned	Extremely concerned	Economic impacts of COVID-19	High school graduate or GED	$15,000 - $24,999		6 County region	45-54	1	No	Yes, AA oversample	Female 45 thru 54	0.717294	0.817142	0.586131	0.730096	0.523693	0.850522	0.445413	0.900985	0.646271
1	43	Female	Madison County	No	No	Yes	No	No	No	Unemployed	Single	No	Yes	Very concerned	Somewhat concerned	Very concerned	Somewhat concerned	Economic impacts of COVID-19	Some college or associate's degree	$35,000 - $49,999		6 County region	35-44	1	No	Yes, AA oversample	Female 35 thru 44	0.717294	0.763453	0.54762	0.730096	0.523693	0.802961	0.420505	0.733349	0.526027
1	77	Female	Shelby County	No	No	Yes	No	No	No	Retired	Single	No	No	Somewhat concerned	Very concerned	Somewhat concerned	Very concerned	Economic impacts of COVID-19	Bachelor's degree or higher	$75,000 - $99,999		6 County region	65+	1	No	Yes, AA oversample	Female 65+	0.717294	1.01201	0.72591	0.730096	0.523693	1.05035	0.550059	1.47113	1.05523
1	55	Female	Knox County	Yes	No	Yes	No	No	No	Stay-at-Home Caregiver	Divorced	No	Yes	Extremely concerned	Extremely concerned	Extremely concerned	Very concerned	Economic impacts of COVID-19	Some college or associate's degree	$15,000 - $24,999		6 County region	55-64	2	No	Yes, AA oversample	Female 55 thru 64	0.717294	0.850711	0.610209	0.730096	0.523693	0.862899	0.451894	1.04624	0.750462
1	50	Female	Davidson County	No	No	Yes	No	No	No	Work full-time	Married	Yes	Yes	Extremely concerned	Very concerned	Very concerned	Very concerned	Health impacts of COVID-19	High school graduate or GED	$50,000 - $74,999		6 County region	45-54	1	No	Yes, AA oversample	Female 45 thru 54	0.717294	0.817142	0.586131	0.730096	0.523693	0.850522	0.445413	0.900985	0.646271
1	22	Male	Shelby County	No	No	Yes	No	No	No	Student	Single	No	No	Not very concerned	Somewhat concerned	Extremely concerned	Extremely concerned	Economic impacts of COVID-19	Less than high school graduate	$50,000 - $74,999		6 County region	18-24	1	No	Yes, AA oversample	Male 18 thru 24	0.717294	1.23261	0.884145	0.730096	0.523693	1.24389	0.651415	0.8773	0.629282
1	47	Female	Shelby County	No	No	Yes	No	No	No	Work full-time	Single	No	No	Somewhat concerned	Very concerned	Somewhat concerned	Extremely concerned	Health impacts of COVID-19	Some college or associate's degree	$50,000 - $74,999		6 County region	45-54	1	No	Yes, AA oversample	Female 45 thru 54	0.717294	0.817142	0.586131	0.730096	0.523693	0.850522	0.445413	0.900985	0.646271
1	21	Female	Shelby County	No	No	Yes	No	No	No	Work part-time	Single	No	Yes	Somewhat concerned	Very concerned	Very concerned	Extremely concerned	Health impacts of COVID-19	Some college or associate's degree	$50,000 - $74,999		6 County region	18-24	1	No	Yes, AA oversample	Female 18 thru 24	0.717294	0.654556	0.469509	0.730096	0.523693	0.698121	0.365601	0.394655	0.283084
1	20	Female	Davidson County	No	No	Yes	No	No	No	Work full-time	Married	Yes	No	Extremely concerned	Extremely concerned	Extremely concerned	Extremely concerned	Health impacts of COVID-19	Less than high school graduate	Less than $15,000		6 County region	18-24	1	No	Yes, AA oversample	Female 18 thru 24	0.717294	0.654556	0.469509	0.730096	0.523693	0.698121	0.365601	0.394655	0.283084
1	63	Male	Shelby County	No	No	Yes	No	No	No	Retired	Living with someone	No	Yes	Not very concerned	Very concerned	Very concerned	Extremely concerned	Economic impacts of COVID-19	High school graduate or GED	$25,000 - $34,999		6 County region	55-64	1	No	Yes, AA oversample	Male 55 thru 65	0.717294	1.15827	0.830822	0.730096	0.523693	1.10949	0.581034	5.59077	4.01022
1	64	Female	Davidson County	No	No	Yes	No	No	No	Retired	Single	No	Yes	Extremely concerned	Extremely concerned	Extremely concerned	Extremely concerned	Health impacts of COVID-19	Bachelor's degree or higher	$75,000 - $99,999		6 County region	55-64	1	No	Yes, AA oversample	Female 55 thru 64	0.717294	0.850711	0.610209	0.730096	0.523693	0.862899	0.451894	1.04624	0.750462
1	20	Female	Knox County	No	No	Yes	No	No	No	Looking for work	Living with someone	No	No	Not very concerned	Somewhat concerned	Extremely concerned	Very concerned	Economic impacts of COVID-19	Some college or associate's degree	$25,000 - $34,999		6 County region	18-24	1	No	Yes, AA oversample	Female 18 thru 24	0.717294	0.654556	0.469509	0.730096	0.523693	0.698121	0.365601	0.394655	0.283084
1	32	Male	Shelby County	No	No	Yes	No	No	No	Work part-time	Married	Yes	No	Not very concerned	Very concerned	Extremely concerned	Very concerned	Economic impacts of COVID-19	Bachelor's degree or higher	$100,000 - $149,999		6 County region	25-34	1	No	Yes, AA oversample	Male 25 thru 34	0.717294	1.42702	1.02359	0.730096	0.523693	1.31307	0.687645	1.15163	0.826056
1	33	Male	Shelby County	No	No	Yes	No	No	No	Work full-time	Single	Yes	No	Extremely concerned	Extremely concerned	Extremely concerned	Extremely concerned	Health impacts of COVID-19	Some college or associate's degree	$50,000 - $74,999		6 County region	25-34	1	No	Yes, AA oversample	Male 25 thru 34	0.717294	1.42702	1.02359	0.730096	0.523693	1.31307	0.687645	1.15163	0.826056
1	27	Female	Shelby County	No	No	Yes	No	No	No	Work part-time	Single	No	No	Somewhat concerned	Extremely concerned	Extremely concerned	Extremely concerned	Health impacts of COVID-19	High school graduate or GED	Less than $15,000		6 County region	25-34	1	No	Yes, AA oversample	Female 25 thru 34	0.717294	0.911825	0.654046	0.730096	0.523693	0.854477	0.447484	0.857145	0.614825
1	21	Female	Shelby County	No	No	Yes	No	No	No	Student	Single	No	Yes	Very concerned	Very concerned	Extremely concerned	Extremely concerned	Health impacts of COVID-19	Some college or associate's degree	$100,000 - $149,999		6 County region	18-24	1	No	Yes, AA oversample	Female 18 thru 24	0.717294	0.654556	0.469509	0.730096	0.523693	0.698121	0.365601	0.394655	0.283084
1	30	Female	Hamilton County	No	No	Yes	No	No	No	Stay-at-Home Caregiver	Single	No	No	Somewhat concerned	Extremely concerned	Not very concerned	Very concerned	Economic impacts of COVID-19	High school graduate or GED	Less than $15,000		6 County region	25-34	1	No	Yes, AA oversample	Female 25 thru 34	0.717294	0.911825	0.654046	0.730096	0.523693	0.854477	0.447484	0.857145	0.614825
1	21	Female	Knox County	No	No	Yes	No	No	No	Work full-time	Single	No	Yes	Somewhat concerned	Very concerned	Very concerned	Very concerned	Health impacts of COVID-19	High school graduate or GED	Less than $15,000		6 County region	18-24	1	No	Yes, AA oversample	Female 18 thru 24	0.717294	0.654556	0.469509	0.730096	0.523693	0.698121	0.365601	0.394655	0.283084
1	19	Female	Hamilton County	No	No	Yes	No	No	No	Work full-time	Single	Yes	Yes	Extremely concerned	Extremely concerned	Extremely concerned	Extremely concerned	Economic impacts of COVID-19	Some college or associate's degree	$100,000 - $149,999		6 County region	18-24	1	No	Yes, AA oversample	Female 18 thru 24	0.717294	0.654556	0.469509	0.730096	0.523693	0.698121	0.365601	0.394655	0.283084
1	18	Male	Hamilton County	No	No	Yes	No	No	No	Unemployed	Married	Yes	No	Very concerned	Extremely concerned	Extremely concerned	Extremely concerned	Economic impacts of COVID-19	Some college or associate's degree	$50,000 - $74,999		6 County region	18-24	1	No	Yes, AA oversample	Male 18 thru 24	0.717294	1.23261	0.884145	0.730096	0.523693	1.24389	0.651415	0.8773	0.629282
1	57	Female	Shelby County	No	No	Yes	No	No	No	Work full-time	Single	No	Yes	Somewhat concerned	Somewhat concerned	Not very concerned	Extremely concerned	Health impacts of COVID-19	Bachelor's degree or higher	$75,000 - $99,999		6 County region	55-64	1	No	Yes, AA oversample	Female 55 thru 64	0.717294	0.850711	0.610209	0.730096	0.523693	0.862899	0.451894	1.04624	0.750462
1	47	Female	Davidson County	No	No	Yes	No	No	No	Retired	Dating	Yes	No	Extremely concerned	Extremely concerned	Extremely concerned	Extremely concerned	Health impacts of COVID-19	Some college or associate's degree	Less than $15,000		6 County region	45-54	1	No	Yes, AA oversample	Female 45 thru 54	0.717294	0.817142	0.586131	0.730096	0.523693	0.850522	0.445413	0.900985	0.646271
1	29	Female	Shelby County	No	No	Yes	No	No	No	Unemployed	Single	Yes	No	Extremely concerned	Extremely concerned	Extremely concerned	Somewhat concerned	Economic impacts of COVID-19	High school graduate or GED	Less than $15,000		6 County region	25-34	1	No	Yes, AA oversample	Female 25 thru 34	0.717294	0.911825	0.654046	0.730096	0.523693	0.854477	0.447484	0.857145	0.614825
1	50	Female	Shelby County	No	No	Yes	No	No	No	Work full-time	Single	No	No	Not at all concerned	Not at all concerned	Not at all concerned	Very concerned	Economic impacts of COVID-19	Some college or associate's degree	$35,000 - $49,999		6 County region	45-54	1	No	Yes, AA oversample	Female 45 thru 54	0.717294	0.817142	0.586131	0.730096	0.523693	0.850522	0.445413	0.900985	0.646271
1	75	Female	Shelby County	No	No	Yes	No	No	No	Retired	Single	No	No	Extremely concerned	Extremely concerned	Extremely concerned		Health impacts of COVID-19	Some college or associate's degree	$35,000 - $49,999		6 County region	65+	1	No	Yes, AA oversample	Female 65+	0.717294	1.01201	0.72591	0.730096	0.523693	1.05035	0.550059	1.47113	1.05523
1	20	Female	Shelby County	No	No	Yes	No	No	No	Work full-time	Dating	Yes	No	Very concerned	Very concerned	Somewhat concerned	Extremely concerned	Health impacts of COVID-19	Bachelor's degree or higher	$50,000 - $74,999		6 County region	18-24	1	No	Yes, AA oversample	Female 18 thru 24	0.717294	0.654556	0.469509	0.730096	0.523693	0.698121	0.365601	0.394655	0.283084
1	43	Female	Shelby County	No	No	Yes	No	No	No	Work part-time	Single	No	Yes	Very concerned	Somewhat concerned	Very concerned	Very concerned	Economic impacts of COVID-19	Some college or associate's degree	$15,000 - $24,999		6 County region	35-44	1	No	Yes, AA oversample	Female 35 thru 44	0.717294	0.763453	0.54762	0.730096	0.523693	0.802961	0.420505	0.733349	0.526027
1	40	Female	Shelby County	No	No	Yes	No	No	No	Work full-time	Married	Yes	No	Somewhat concerned	Somewhat concerned	Somewhat concerned	Extremely concerned	Economic impacts of COVID-19	Some college or associate's degree	$100,000 - $149,999		6 County region	35-44	1	No	Yes, AA oversample	Female 35 thru 44	0.717294	0.763453	0.54762	0.730096	0.523693	0.802961	0.420505	0.733349	0.526027
1	42	Female	Shelby County	No	No	Yes	No	No	No	Work full-time	Married	Yes	No	Somewhat concerned	Somewhat concerned	Very concerned	Somewhat concerned	Economic impacts of COVID-19	Bachelor's degree or higher	$75,000 - $99,999		6 County region	35-44	1	No	Yes, AA oversample	Female 35 thru 44	0.717294	0.763453	0.54762	0.730096	0.523693	0.802961	0.420505	0.733349	0.526027
1	58	Male	Davidson County	No	No	Yes	No	No	No	Work full-time	Married	No	No	Very concerned	Very concerned	Extremely concerned	Very concerned	Health impacts of COVID-19	Some college or associate's degree	$35,000 - $49,999		6 County region	55-64	1	No	Yes, AA oversample	Male 55 thru 65	0.717294	1.15827	0.830822	0.730096	0.523693	1.10949	0.581034	5.59077	4.01022
1	25	Female	Shelby County	No	No	Yes	No	No	No	Work full-time	Dating	No	No	Not very concerned	Very concerned	Extremely concerned	Very concerned	Health impacts of COVID-19	Some college or associate's degree	$75,000 - $99,999		6 County region	25-34	1	No	Yes, AA oversample	Female 25 thru 34	0.717294	0.911825	0.654046	0.730096	0.523693	0.854477	0.447484	0.857145	0.614825
1	58	Female	Davidson County	No	No	Yes	No	No	No	Work full-time	Single	No	Yes	Very concerned	Extremely concerned	Extremely concerned	Very concerned	Health impacts of COVID-19	Some college or associate's degree	$75,000 - $99,999		6 County region	55-64	1	No	Yes, AA oversample	Female 55 thru 64	0.717294	0.850711	0.610209	0.730096	0.523693	0.862899	0.451894	1.04624	0.750462
1	24	Male	Shelby County	No	No	Yes	No	No	No	Unemployed	Married	No	No	Somewhat concerned	Not very concerned	Somewhat concerned	Extremely concerned	Economic impacts of COVID-19	High school graduate or GED	$15,000 - $24,999		6 County region	18-24	1	No	Yes, AA oversample	Male 18 thru 24	0.717294	1.23261	0.884145	0.730096	0.523693	1.24389	0.651415	0.8773	0.629282
1	47	Female	Shelby County	No	No	Yes	No	No	No	Stay-at-Home Caregiver	Single	Yes	No	Extremely concerned	Extremely concerned	Extremely concerned	Extremely concerned	Economic impacts of COVID-19	High school graduate or GED	$25,000 - $34,999		6 County region	45-54	1	No	Yes, AA oversample	Female 45 thru 54	0.717294	0.817142	0.586131	0.730096	0.523693	0.850522	0.445413	0.900985	0.646271
1	22	Female	Shelby County	No	No	Yes	No	No	No	Work part-time	Living with someone	Yes	No	Somewhat concerned	Somewhat concerned	Somewhat concerned	Very concerned	Health impacts of COVID-19	Some college or associate's degree	$75,000 - $99,999		6 County region	18-24	1	No	Yes, AA oversample	Female 18 thru 24	0.717294	0.654556	0.469509	0.730096	0.523693	0.698121	0.365601	0.394655	0.283084
1	42	Male	Hamilton County	No	No	Yes	No	No	No	Unemployed	Living with someone	No	Yes	Somewhat concerned	Very concerned	Extremely concerned	Very concerned	Economic impacts of COVID-19	Less than high school graduate	Less than $15,000		6 County region	35-44	1	No	Yes, AA oversample	Male 35 thru 44	0.717294	1.00481	0.720747	0.730096	0.523693	0.954872	0.50006	1.07527	0.771287
1	57	Female	Madison County	No	No	Yes	No	No	No	Stay-at-Home Caregiver	Married	No	Yes	Extremely concerned	Extremely concerned	Extremely concerned	Extremely concerned	Health impacts of COVID-19	Some college or associate's degree	$75,000 - $99,999		6 County region	55-64	1	No	Yes, AA oversample	Female 55 thru 64	0.717294	0.850711	0.610209	0.730096	0.523693	0.862899	0.451894	1.04624	0.750462
1	45	Female	Shelby County	No	No	Yes	No	No	No	Work full-time	Married	Yes	Yes	Somewhat concerned	Very concerned	Very concerned	Somewhat concerned	Health impacts of COVID-19	Less than high school graduate	$150,000 or more		6 County region	45-54	1	No	Yes, AA oversample	Female 45 thru 54	0.717294	0.817142	0.586131	0.730096	0.523693	0.850522	0.445413	0.900985	0.646271
1	34	Female	Madison County	No	No	Yes	No	No	No	Work full-time	Single	No	Yes	Very concerned	Somewhat concerned	Somewhat concerned	Somewhat concerned	Health impacts of COVID-19	Bachelor's degree or higher	$15,000 - $24,999		6 County region	25-34	1	No	Yes, AA oversample	Female 25 thru 34	0.717294	0.911825	0.654046	0.730096	0.523693	0.854477	0.447484	0.857145	0.614825
1	27	Female	Knox County	No	No	Yes	No	No	No	Retired	Dating	Yes	No	Very concerned	Somewhat concerned	Very concerned	Extremely concerned	Health impacts of COVID-19	High school graduate or GED	$15,000 - $24,999		6 County region	25-34	1	No	Yes, AA oversample	Female 25 thru 34	0.717294	0.911825	0.654046	0.730096	0.523693	0.854477	0.447484	0.857145	0.614825
1	68	Male	Maury County	No	No	No	No	Yes	No	Retired	Married	No	Yes	Somewhat concerned	Not very concerned	Somewhat concerned	Extremely concerned	Economic impacts of COVID-19	Some college or associate's degree	$50,000 - $74,999		89 County region	65+	1	No	No	Male 65+	1	1.16223	1.16223	1.32018	1.32018	1.31733	1.73911
1	47	Male	Rutherford County	No	No	No	No	Yes	No	Work full-time	Married	Yes	No	Somewhat concerned	Somewhat concerned	Somewhat concerned	Very concerned	Health impacts of COVID-19	Bachelor's degree or higher	$75,000 - $99,999		89 County region	45-54	1	No	No	Male 45 thru 54	1	1.57634	1.57634	1.32018	1.32018	1.43334	1.89227
1	75	Male	Obion County	No	No	No	No	Yes	No	Retired	Married	No	Yes	Somewhat concerned	Not very concerned	Extremely concerned		Economic impacts of COVID-19	Bachelor's degree or higher	$35,000 - $49,999		89 County region	65+	1	No	No	Male 65+	1	1.16223	1.16223	1.32018	1.32018	1.31733	1.73911
1	40	Female	Wayne County	No	No	No	No	Yes	No	Unemployed	Separated	Yes	No	Extremely concerned	Extremely concerned	Extremely concerned	Extremely concerned	Economic impacts of COVID-19	Some college or associate's degree	$35,000 - $49,999		89 County region	35-44	1	No	No	Female 35 thru 44	1	0.833217	0.833217	1.32018	1.32018	0.802961	1.06005
1	22	Male	Henry County	No	No	No	No	Yes	No	Work full-time	Single	No	No	Not very concerned	Somewhat concerned	Somewhat concerned	Somewhat concerned	Economic impacts of COVID-19	Bachelor's degree or higher	Less than $15,000		89 County region	18-24	1	No	No	Male 18 thru 24	1	1.24847	1.24847	1.32018	1.32018	1.24389	1.64216
1	28	Female	Henry County	No	No	No	No	Yes	No	Student	Single	No	Yes	Extremely concerned	Very concerned	Extremely concerned	Extremely concerned	Economic impacts of COVID-19	High school graduate or GED	$35,000 - $49,999		89 County region	25-34	1	No	No	Female 25 thru 34	1	0.809019	0.809019	1.32018	1.32018	0.854477	1.12806
1	22	Female	Williamson County	No	Yes	No	No	No	No	Work part-time	Single	No	Yes	Somewhat concerned	Very concerned	Very concerned	Somewhat concerned	Economic impacts of COVID-19	Bachelor's degree or higher	$75,000 - $99,999		89 County region	18-24	1	Yes	No	Female 18 thru 24	1	0.736171	0.736171	1.32018	1.32018	0.698121	0.921645
1	56	Female	Johnson County	No	No	No	No	Yes	No	Stay-at-Home Caregiver	Married	No	Yes	Very concerned	Somewhat concerned	Somewhat concerned	Very concerned	Health impacts of COVID-19	High school graduate or GED	$35,000 - $49,999		89 County region	55-64	1	No	No	Female 55 thru 64	1	0.871068	0.871068	1.32018	1.32018	0.862899	1.13918
1	72	Female	Cumberland County	No	No	No	No	Yes	No	Retired	Married	No	Yes	Not very concerned	Somewhat concerned	Very concerned	Extremely concerned	Economic impacts of COVID-19	Some college or associate's degree	$35,000 - $49,999		89 County region	65+	1	No	No	Female 65+	1	1.07058	1.07058	1.32018	1.32018	1.05035	1.38664
1	22	Female	Carroll County	No	No	No	No	Yes	No	Work part-time	Living with someone	Yes	No	Somewhat concerned	Somewhat concerned	Not very concerned	Very concerned	Health impacts of COVID-19	Some college or associate's degree	$75,000 - $99,999		89 County region	18-24	1	No	No	Female 18 thru 24	1	0.736171	0.736171	1.32018	1.32018	0.698121	0.921645
1	65	Male	Gibson County	No	No	No	No	Yes	No	Retired	Married	No	Yes	Somewhat concerned	Somewhat concerned	Somewhat concerned	Somewhat concerned	Economic impacts of COVID-19	Some college or associate's degree	$50,000 - $74,999		89 County region	65+	1	No	No	Male 65+	1	1.16223	1.16223	1.32018	1.32018	1.31733	1.73911
1	32	Female	Stewart County	No	No	No	No	Yes	No	Work full-time	Married	No	Yes	Very concerned	Very concerned	Very concerned	Extremely concerned	Economic impacts of COVID-19	High school graduate or GED	$25,000 - $34,999		89 County region	25-34	1	No	No	Female 25 thru 34	1	0.809019	0.809019	1.32018	1.32018	0.854477	1.12806
1	58	Male	Williamson County	No	No	No	No	Yes	No	Work full-time	Married	No	Yes	Somewhat concerned	Somewhat concerned	Very concerned	Very concerned	Health impacts of COVID-19	Some college or associate's degree	$50,000 - $74,999		89 County region	55-64	1	No	No	Male 55 thru 65	1	1.08219	1.08219	1.32018	1.32018	1.10949	1.46473
1	40	Female	Smith County	No	No	No	No	Yes	No	Work part-time	Married	Yes	No	Somewhat concerned	Very concerned	Very concerned	Very concerned	Health impacts of COVID-19	Some college or associate's degree	$100,000 - $149,999		89 County region	35-44	1	No	No	Female 35 thru 44	1	0.833217	0.833217	1.32018	1.32018	0.802961	1.06005
1	46	Female	Williamson County	No	No	No	No	Yes	No	Stay-at-Home Caregiver	Married	Yes	No	Not very concerned	Not very concerned	Somewhat concerned	Very concerned	Economic impacts of COVID-19	Some college or associate's degree	$100,000 - $149,999		89 County region	45-54	1	No	No	Female 45 thru 54	1	0.873441	0.873441	1.32018	1.32018	0.850522	1.12284
1	40	Male	Marshall County	No	No	No	No	Yes	No	Work full-time	Married	Yes	No	Very concerned	Extremely concerned	Extremely concerned	Extremely concerned	Health impacts of COVID-19	Some college or associate's degree	$75,000 - $99,999		89 County region	35-44	1	No	No	Male 35 thru 44	1	0.924303	0.924303	1.32018	1.32018	0.954872	1.2606
1	25	Female	Cheatham County	No	No	No	No	Yes	No	Work full-time	Married	No	Yes	Somewhat concerned	Somewhat concerned	Somewhat concerned	Very concerned	Economic impacts of COVID-19	Some college or associate's degree	$50,000 - $74,999		89 County region	25-34	1	No	No	Female 25 thru 34	1	0.809019	0.809019	1.32018	1.32018	0.854477	1.12806
1	25	Female	Humphreys County	No	No	No	No	Yes	No	Work full-time	Dating	No	No	Not at all concerned	Not very concerned	Somewhat concerned	Not very concerned	Economic impacts of COVID-19	High school graduate or GED	Less than $15,000		89 County region	25-34	1	No	No	Female 25 thru 34	1	0.809019	0.809019	1.32018	1.32018	0.854477	1.12806
1	45	Female	McMinn County	No	No	No	No	Yes	No	Unemployed	Married	No	No	Somewhat concerned	Somewhat concerned	Very concerned	Somewhat concerned	Health impacts of COVID-19	Some college or associate's degree	$75,000 - $99,999		89 County region	45-54	1	No	No	Female 45 thru 54	1	0.873441	0.873441	1.32018	1.32018	0.850522	1.12284
1	19	Female	Jefferson County	No	No	Yes	No	No	No	Work part-time	Single	No	Yes	Very concerned	Very concerned	Extremely concerned	Very concerned	Health impacts of COVID-19	High school graduate or GED	Less than $15,000		89 County region	18-24	1	No	No	Female 18 thru 24	0.312422	0.736171	0.229996	1.32018	0.412453	0.698121	0.287942	0.394655	0.246598
1	76	Female	Hickman County	No	No	No	No	Yes	No	Retired	Married	No	No	Very concerned	Very concerned	Very concerned	Very concerned	Economic impacts of COVID-19	High school graduate or GED	$25,000 - $34,999		89 County region	65+	1	No	No	Female 65+	1	1.07058	1.07058	1.32018	1.32018	1.05035	1.38664
1	54	Female	Williamson County	No	No	No	No	Yes	No	Work part-time	Married	No	No	Very concerned	Somewhat concerned	Somewhat concerned	Extremely concerned	Health impacts of COVID-19	Some college or associate's degree	$100,000 - $149,999		89 County region	45-54	1	No	No	Female 45 thru 54	1	0.873441	0.873441	1.32018	1.32018	0.850522	1.12284
1	38	Female	Blount County	No	No	No	Yes	Yes	No	Work full-time	Married	Yes	No	Not very concerned	Somewhat concerned	Very concerned	Somewhat concerned	Health impacts of COVID-19	Bachelor's degree or higher	$75,000 - $99,999		89 County region	35-44	2	No	No	Female 35 thru 44	1	0.833217	0.833217	1.32018	1.32018	0.802961	1.06005
1	84	Female	Maury County	No	No	No	No	Yes	No	Retired	Married	No	Yes	Not very concerned	Not very concerned	Not very concerned	Somewhat concerned	Economic impacts of COVID-19	High school graduate or GED	$100,000 - $149,999		89 County region	65+	1	No	No	Female 65+	1	1.07058	1.07058	1.32018	1.32018	1.05035	1.38664
1	63	Female	Decatur County	No	No	No	No	Yes	No	Work full-time	Married	No	Yes	Not very concerned	Not very concerned	Somewhat concerned	Very concerned	Economic impacts of COVID-19	High school graduate or GED	$15,000 - $24,999		89 County region	55-64	1	No	No	Female 55 thru 64	1	0.871068	0.871068	1.32018	1.32018	0.862899	1.13918
1	69	Male	Scott County	No	No	No	No	Yes	No	Retired	Single	No	Yes	Extremely concerned	Extremely concerned	Extremely concerned	Extremely concerned	Health impacts of COVID-19	Bachelor's degree or higher	$50,000 - $74,999		89 County region	65+	1	No	No	Male 65+	1	1.16223	1.16223	1.32018	1.32018	1.31733	1.73911
1	81	Female	Hamblen County	No	No	No	No	Yes	No	Retired	Married	No	Yes	Very concerned	Very concerned	Very concerned	Very concerned	Economic impacts of COVID-19	Some college or associate's degree	$25,000 - $34,999		89 County region	65+	1	No	No	Female 65+	1	1.07058	1.07058	1.32018	1.32018	1.05035	1.38664
1	45	Male	Jackson County	No	No	No	No	Yes	No	Retired	Divorced	No	Yes	Not at all concerned	Not at all concerned	Not at all concerned	Not very concerned	Economic impacts of COVID-19	High school graduate or GED	$15,000 - $24,999		89 County region	45-54	1	No	No	Male 45 thru 54	1	1.57634	1.57634	1.32018	1.32018	1.43334	1.89227
1	21	Female	Roane County	No	No	No	No	Yes	No	Looking for work	Living with someone	No	No	Not very concerned	Somewhat concerned	Somewhat concerned	Somewhat concerned	Economic impacts of COVID-19	Some college or associate's degree	$25,000 - $34,999		89 County region	18-24	1	No	No	Female 18 thru 24	1	0.736171	0.736171	1.32018	1.32018	0.698121	0.921645
1	72	Female	Blount County	No	No	No	No	Yes	No	Retired	Single	No	Yes	Somewhat concerned	Not very concerned	Not very concerned	Somewhat concerned	Health impacts of COVID-19	Less than high school graduate	Less than $15,000		89 County region	65+	1	No	No	Female 65+	1	1.07058	1.07058	1.32018	1.32018	1.05035	1.38664
1	28	Female	Roane County	No	No	No	No	Yes	No	Stay-at-Home Caregiver	Married	Yes	No	Somewhat concerned	Very concerned	Somewhat concerned	Extremely concerned	Economic impacts of COVID-19	High school graduate or GED	$15,000 - $24,999		89 County region	25-34	1	No	No	Female 25 thru 34	1	0.809019	0.809019	1.32018	1.32018	0.854477	1.12806
1	25	Female	Coffee County	No	No	No	No	Yes	No	Student	Living with someone	Yes	No	Somewhat concerned	Very concerned	Extremely concerned	Extremely concerned	Economic impacts of COVID-19	Some college or associate's degree	$50,000 - $74,999		89 County region	25-34	1	No	No	Female 25 thru 34	1	0.809019	0.809019	1.32018	1.32018	0.854477	1.12806
1	40	Female	White County	No	No	No	Yes	No	No	Stay-at-Home Caregiver	Married	Yes	No	Somewhat concerned	Very concerned	Somewhat concerned	Very concerned	Economic impacts of COVID-19	Some college or associate's degree	$15,000 - $24,999		89 County region	35-44	1	Yes	No	Female 35 thru 44	1	0.833217	0.833217	1.32018	1.32018	0.802961	1.06005
1	64	Female	Montgomery County	No	No	No	No	Yes	No	Work full-time	Single	No	No	Somewhat concerned	Somewhat concerned	Extremely concerned	Very concerned	Health impacts of COVID-19	Some college or associate's degree	$15,000 - $24,999		89 County region	55-64	1	No	No	Female 55 thru 64	1	0.871068	0.871068	1.32018	1.32018	0.862899	1.13918
1	68	Female	DeKalb County	No	No	No	No	Yes	No	Work part-time	Married	No	Yes	Not very concerned	Not very concerned	Somewhat concerned	Very concerned	Health impacts of COVID-19	Bachelor's degree or higher	$75,000 - $99,999		89 County region	65+	1	No	No	Female 65+	1	1.07058	1.07058	1.32018	1.32018	1.05035	1.38664
1	67	Female	Washington County	No	No	No	No	Yes	No	Work full-time	Single	No	No	Very concerned	Extremely concerned	Somewhat concerned	Extremely concerned	Economic impacts of COVID-19	Some college or associate's degree	$35,000 - $49,999		89 County region	65+	1	No	No	Female 65+	1	1.07058	1.07058	1.32018	1.32018	1.05035	1.38664
1	27	Female	Rhea County	No	No	No	No	Yes	No	Stay-at-Home Caregiver	Married	Yes	No	Somewhat concerned	Extremely concerned	Very concerned	Very concerned	Health impacts of COVID-19	High school graduate or GED	$25,000 - $34,999		89 County region	25-34	1	No	No	Female 25 thru 34	1	0.809019	0.809019	1.32018	1.32018	0.854477	1.12806
1	68	Female	Lincoln County	No	No	No	No	Yes	No	Retired	Living with someone	No	No	Somewhat concerned	Somewhat concerned	Somewhat concerned	Extremely concerned	Economic impacts of COVID-19	Some college or associate's degree	Less than $15,000		89 County region	65+	1	No	No	Female 65+	1	1.07058	1.07058	1.32018	1.32018	1.05035	1.38664
1	48	Female	Washington County	No	No	No	No	Yes	No	Unemployed	Divorced	No	No	Very concerned	Very concerned	Extremely concerned	Somewhat concerned	Economic impacts of COVID-19	Some college or associate's degree	$50,000 - $74,999		89 County region	45-54	1	No	No	Female 45 thru 54	1	0.873441	0.873441	1.32018	1.32018	0.850522	1.12284
1	29	Female	Fentress County	No	No	No	No	Yes	No	Work part-time	Married	Yes	No	Somewhat concerned	Somewhat concerned	Somewhat concerned	Somewhat concerned	Economic impacts of COVID-19	High school graduate or GED	$25,000 - $34,999		89 County region	25-34	1	No	No	Female 25 thru 34	1	0.809019	0.809019	1.32018	1.32018	0.854477	1.12806
1	78	Female	Stewart County	No	No	No	No	Yes	No	Retired	Married	No	Yes	Extremely concerned	Extremely concerned	Extremely concerned	Extremely concerned	Health impacts of COVID-19	Bachelor's degree or higher	$100,000 - $149,999		89 County region	65+	1	No	No	Female 65+	1	1.07058	1.07058	1.32018	1.32018	1.05035	1.38664
1	32	Female	Maury County	No	No	No	No	Yes	No	Stay-at-Home Caregiver	Living with someone	Yes	No	Extremely concerned	Very concerned	Very concerned	Very concerned	Health impacts of COVID-19	High school graduate or GED	$35,000 - $49,999		89 County region	25-34	1	No	No	Female 25 thru 34	1	0.809019	0.809019	1.32018	1.32018	0.854477	1.12806
1	49	Male	Dickson County	No	No	No	No	Yes	No	Work full-time	Married	Yes	No	Extremely concerned	Extremely concerned	Extremely concerned	Very concerned	Health impacts of COVID-19	Bachelor's degree or higher	$100,000 - $149,999		89 County region	45-54	1	No	No	Male 45 thru 54	1	1.57634	1.57634	1.32018	1.32018	1.43334	1.89227
1	66	Male	Sevier County	No	No	No	No	Yes	No	Retired	Married	No	Yes	Somewhat concerned	Somewhat concerned	Somewhat concerned	Extremely concerned	Economic impacts of COVID-19	Bachelor's degree or higher	$35,000 - $49,999		89 County region	65+	1	No	No	Male 65+	1	1.16223	1.16223	1.32018	1.32018	1.31733	1.73911
1	72	Male	Anderson County	No	No	No	No	Yes	No	Retired	Married	No	Yes	Not at all concerned	Somewhat concerned	Not very concerned	Extremely concerned	Economic impacts of COVID-19	High school graduate or GED	$15,000 - $24,999		89 County region	65+	1	No	No	Male 65+	1	1.16223	1.16223	1.32018	1.32018	1.31733	1.73911
1	64	Female	Warren County	No	No	No	No	Yes	No	Work part-time	Married	No	Yes	Not at all concerned	Not at all concerned	Not very concerned	Not very concerned	Health impacts of COVID-19	High school graduate or GED	$50,000 - $74,999		89 County region	55-64	1	No	No	Female 55 thru 64	1	0.871068	0.871068	1.32018	1.32018	0.862899	1.13918
1	80	Male	Putnam County	No	No	No	No	Yes	No	Retired	Married	No	Yes	Not very concerned	Not very concerned	Not very concerned	Somewhat concerned	Economic impacts of COVID-19	High school graduate or GED	$75,000 - $99,999		89 County region	65+	1	No	No	Male 65+	1	1.16223	1.16223	1.32018	1.32018	1.31733	1.73911
1	63	Female	Monroe County	No	No	No	No	Yes	No	Retired	Married	No	Yes	Not very concerned	Not very concerned	Not very concerned	Very concerned	Health impacts of COVID-19	Bachelor's degree or higher	$75,000 - $99,999		89 County region	55-64	1	No	No	Female 55 thru 64	1	0.871068	0.871068	1.32018	1.32018	0.862899	1.13918
1	77	Female	Roane County	No	No	No	No	Yes	No	Retired	Single	No	Yes	Somewhat concerned	Somewhat concerned	Very concerned	Very concerned	Economic impacts of COVID-19	High school graduate or GED	$15,000 - $24,999		89 County region	65+	1	No	No	Female 65+	1	1.07058	1.07058	1.32018	1.32018	1.05035	1.38664
1	35	Male	White County	No	No	No	No	Yes	No	Work full-time	Married	Yes	No	Extremely concerned	Very concerned	Very concerned	Extremely concerned	Health impacts of COVID-19	Bachelor's degree or higher	$100,000 - $149,999		89 County region	35-44	1	No	No	Male 35 thru 44	1	0.924303	0.924303	1.32018	1.32018	0.954872	1.2606
1	65	Female	Williamson County	No	No	No	No	Yes	No	Work full-time	Living with someone	No	Yes	Very concerned	Very concerned	Very concerned	Extremely concerned	Economic impacts of COVID-19	Bachelor's degree or higher	$100,000 - $149,999		89 County region	65+	1	No	No	Female 65+	1	1.07058	1.07058	1.32018	1.32018	1.05035	1.38664
1	60	Female	Monroe County	No	No	No	No	Yes	No	Work part-time	Single	No	No	Somewhat concerned	Somewhat concerned	Somewhat concerned	Very concerned	Economic impacts of COVID-19	Some college or associate's degree	Less than $15,000		89 County region	55-64	1	No	No	Female 55 thru 64	1	0.871068	0.871068	1.32018	1.32018	0.862899	1.13918
1	42	Female	Maury County	No	No	No	No	Yes	No	Work part-time	Divorced	Yes	No	Not at all concerned	Somewhat concerned	Somewhat concerned	Somewhat concerned	Economic impacts of COVID-19	Some college or associate's degree	Less than $15,000		89 County region	35-44	1	No	No	Female 35 thru 44	1	0.833217	0.833217	1.32018	1.32018	0.802961	1.06005
1	70	Female	Carter County	No	No	No	No	Yes	No	Retired	Married	No	Yes	Somewhat concerned	Somewhat concerned	Somewhat concerned	Somewhat concerned	Health impacts of COVID-19	Some college or associate's degree	$35,000 - $49,999		89 County region	65+	1	No	No	Female 65+	1	1.07058	1.07058	1.32018	1.32018	1.05035	1.38664
1	75	Female	Washington County	No	No	No	No	Yes	No	Work full-time	Single	No	Yes	Very concerned	Very concerned	Very concerned	Very concerned	Economic impacts of COVID-19	Bachelor's degree or higher	$75,000 - $99,999		89 County region	65+	1	No	No	Female 65+	1	1.07058	1.07058	1.32018	1.32018	1.05035	1.38664
1	43	Female	Cheatham County	No	No	No	No	Yes	No	Work full-time	Married	No	No	Extremely concerned	Very concerned	Extremely concerned	Extremely concerned	Health impacts of COVID-19	High school graduate or GED	$35,000 - $49,999		89 County region	35-44	1	No	No	Female 35 thru 44	1	0.833217	0.833217	1.32018	1.32018	0.802961	1.06005
1	59	Female	Gibson County	No	No	No	No	Yes	No	Retired	Living with someone	No	Yes	Extremely concerned	Extremely concerned	Extremely concerned	Extremely concerned	Health impacts of COVID-19	High school graduate or GED	$35,000 - $49,999		89 County region	55-64	1	No	No	Female 55 thru 64	1	0.871068	0.871068	1.32018	1.32018	0.862899	1.13918
1	53	Male	Dickson County	No	No	No	No	Yes	No	Work full-time	Married	No	No	Not very concerned	Not very concerned	Not very concerned	Very concerned	Economic impacts of COVID-19	Bachelor's degree or higher	$150,000 or more		89 County region	45-54	1	No	No	Male 45 thru 54	1	1.57634	1.57634	1.32018	1.32018	1.43334	1.89227
1	57	Female	Warren County	No	No	No	No	Yes	No	Stay-at-Home Caregiver	Married	No	Yes	Somewhat concerned	Somewhat concerned	Very concerned	Very concerned	Health impacts of COVID-19	High school graduate or GED	$50,000 - $74,999		89 County region	55-64	1	No	No	Female 55 thru 64	1	0.871068	0.871068	1.32018	1.32018	0.862899	1.13918
1	63	Female	Washington County	No	No	No	No	Yes	No	Retired	Divorced	No	No	Somewhat concerned	Somewhat concerned	Somewhat concerned	Extremely concerned	Health impacts of COVID-19	High school graduate or GED	Less than $15,000		89 County region	55-64	1	No	No	Female 55 thru 64	1	0.871068	0.871068	1.32018	1.32018	0.862899	1.13918
1	18	Female	Sumner County	No	No	No	No	Yes	No	Unemployed	Single	No	No	Somewhat concerned	Extremely concerned	Extremely concerned	Very concerned	Health impacts of COVID-19	High school graduate or GED	$35,000 - $49,999		89 County region	18-24	1	No	No	Female 18 thru 24	1	0.736171	0.736171	1.32018	1.32018	0.698121	0.921645
1	48	Male	Maury County	No	No	No	No	Yes	No	Work full-time	Living with someone	Yes	No	Not very concerned	Not very concerned	Not very concerned	Extremely concerned	Economic impacts of COVID-19	Bachelor's degree or higher	$100,000 - $149,999		89 County region	45-54	1	No	No	Male 45 thru 54	1	1.57634	1.57634	1.32018	1.32018	1.43334	1.89227
1	38	Male	Overton County	No	No	No	No	Yes	No	Work full-time	Married	Yes	No	Somewhat concerned	Somewhat concerned	Somewhat concerned	Not very concerned	Health impacts of COVID-19	High school graduate or GED	$100,000 - $149,999		89 County region	35-44	1	No	No	Male 35 thru 44	1	0.924303	0.924303	1.32018	1.32018	0.954872	1.2606
1	75	Female	Blount County	No	No	No	No	Yes	No	Retired	Single	No	No	Somewhat concerned	Not very concerned	Somewhat concerned	Very concerned	Health impacts of COVID-19	High school graduate or GED	$15,000 - $24,999		89 County region	65+	1	No	No	Female 65+	1	1.07058	1.07058	1.32018	1.32018	1.05035	1.38664
1	62	Female	Carroll County	No	No	No	No	Yes	No	Retired	Separated	No	Yes	Very concerned	Very concerned	Very concerned	Extremely concerned	Health impacts of COVID-19	Bachelor's degree or higher	Less than $15,000		89 County region	55-64	1	No	No	Female 55 thru 64	1	0.871068	0.871068	1.32018	1.32018	0.862899	1.13918
1	62	Male	Dickson County	No	No	No	No	Yes	No	Retired	Divorced	No	Yes	Not very concerned	Somewhat concerned	Somewhat concerned	Extremely concerned	Health impacts of COVID-19	High school graduate or GED	$15,000 - $24,999		89 County region	55-64	1	No	No	Male 55 thru 65	1	1.08219	1.08219	1.32018	1.32018	1.10949	1.46473
1	54	Male	Hawkins County	No	No	No	No	Yes	No	Work part-time	Married	No	Yes	Not very concerned	Not very concerned	Somewhat concerned	Somewhat concerned	Economic impacts of COVID-19	Some college or associate's degree	$25,000 - $34,999		89 County region	45-54	1	No	No	Male 45 thru 54	1	1.57634	1.57634	1.32018	1.32018	1.43334	1.89227
1	74	Female	Coffee County	No	No	No	No	Yes	No	Retired	Living with someone	No	Yes	Very concerned	Somewhat concerned	Somewhat concerned	Somewhat concerned	Health impacts of COVID-19	Less than high school graduate	$35,000 - $49,999		89 County region	65+	1	No	No	Female 65+	1	1.07058	1.07058	1.32018	1.32018	1.05035	1.38664
1	39	Female	Washington County	No	No	No	No	Yes	No	Work full-time	Married	Yes	No	Very concerned	Very concerned	Very concerned	Very concerned	Health impacts of COVID-19	Some college or associate's degree	Less than $15,000		89 County region	35-44	1	No	No	Female 35 thru 44	1	0.833217	0.833217	1.32018	1.32018	0.802961	1.06005
1	44	Female	Gibson County	No	No	No	No	Yes	No	Student	Separated	Yes	No	Very concerned	Very concerned	Extremely concerned	Extremely concerned	Health impacts of COVID-19	Some college or associate's degree	Less than $15,000		89 County region	35-44	1	No	No	Female 35 thru 44	1	0.833217	0.833217	1.32018	1.32018	0.802961	1.06005
1	30	Female	Rutherford County	No	No	No	Yes	No	No	Unemployed	Married	Yes	No	Very concerned	Very concerned	Very concerned	Very concerned	Economic impacts of COVID-19	Some college or associate's degree	$15,000 - $24,999		89 County region	25-34	1	Yes	No	Female 25 thru 34	1	0.809019	0.809019	1.32018	1.32018	0.854477	1.12806
1	19	Female	Coffee County	No	No	No	No	Yes	No	Work full-time	Single	No	No	Extremely concerned	Extremely concerned	Extremely concerned	Extremely concerned	Health impacts of COVID-19	High school graduate or GED	$15,000 - $24,999		89 County region	18-24	1	No	No	Female 18 thru 24	1	0.736171	0.736171	1.32018	1.32018	0.698121	0.921645
1	21	Female	Williamson County	No	No	No	No	Yes	No	Work full-time	Single	No	No	Not at all concerned	Not at all concerned	Not very concerned	Very concerned	Economic impacts of COVID-19	High school graduate or GED	$35,000 - $49,999		89 County region	18-24	1	No	No	Female 18 thru 24	1	0.736171	0.736171	1.32018	1.32018	0.698121	0.921645
1	72	Male	Rutherford County	No	No	Yes	No	No	No	Work full-time	Married	No	Yes	Extremely concerned	Extremely concerned	Extremely concerned	Extremely concerned	Health impacts of COVID-19	Some college or associate's degree	$35,000 - $49,999		89 County region	65+	1	No	No	Male 65+	0.312422	1.16223	0.363106	1.32018	0.412453	1.31733	0.543338	4.97062	3.10587
1	72	Female	Williamson County	No	No	No	No	Yes	No	Retired	Single	No	Yes	Extremely concerned	Extremely concerned	Extremely concerned	Extremely concerned	Health impacts of COVID-19	Bachelor's degree or higher	$15,000 - $24,999		89 County region	65+	1	No	No	Female 65+	1	1.07058	1.07058	1.32018	1.32018	1.05035	1.38664
1	29	Male	Wilson County	No	No	No	No	Yes	No	Work full-time	Married	Yes	No	Very concerned	Extremely concerned	Extremely concerned	Extremely concerned	Health impacts of COVID-19	Bachelor's degree or higher	$50,000 - $74,999		89 County region	25-34	1	No	No	Male 25 thru 34	1	1.23146	1.23146	1.32018	1.32018	1.31307	1.73349
1	73	Male	Cocke County	No	No	No	No	Yes	No	Retired	Married	No	Yes	Somewhat concerned	Somewhat concerned	Somewhat concerned	Very concerned	Health impacts of COVID-19	High school graduate or GED	$25,000 - $34,999		89 County region	65+	1	No	No	Male 65+	1	1.16223	1.16223	1.32018	1.32018	1.31733	1.73911
1	41	Female	Loudon County	No	No	No	No	Yes	No	Work full-time	Married	Yes	No	Very concerned	Very concerned	Very concerned	Extremely concerned	Economic impacts of COVID-19	Some college or associate's degree	$25,000 - $34,999		89 County region	35-44	1	No	No	Female 35 thru 44	1	0.833217	0.833217	1.32018	1.32018	0.802961	1.06005
1	42	Female	Loudon County	No	No	No	No	Yes	No	Work full-time	Divorced	Yes	No	Very concerned	Very concerned	Very concerned	Extremely concerned	Health impacts of COVID-19	High school graduate or GED	Less than $15,000		89 County region	35-44	1	No	No	Female 35 thru 44	1	0.833217	0.833217	1.32018	1.32018	0.802961	1.06005
1	69	Male	Hawkins County	No	No	No	No	Yes	No	Work full-time	Married	No	Yes	Extremely concerned	Extremely concerned	Extremely concerned	Extremely concerned	Economic impacts of COVID-19	Some college or associate's degree	$35,000 - $49,999		89 County region	65+	1	No	No	Male 65+	1	1.16223	1.16223	1.32018	1.32018	1.31733	1.73911
1	60	Female	Carter County	No	No	No	No	Yes	No	Stay-at-Home Caregiver	Married	No	Yes	Somewhat concerned	Somewhat concerned	Extremely concerned	Extremely concerned	Health impacts of COVID-19	Some college or associate's degree	$15,000 - $24,999		89 County region	55-64	1	No	No	Female 55 thru 64	1	0.871068	0.871068	1.32018	1.32018	0.862899	1.13918
1	31	Female	Bradley County	No	No	No	No	Yes	No	Work full-time	Married	Yes	No	Somewhat concerned	Not very concerned	Not very concerned	Somewhat concerned	Health impacts of COVID-19	Bachelor's degree or higher	$75,000 - $99,999		89 County region	25-34	1	No	No	Female 25 thru 34	1	0.809019	0.809019	1.32018	1.32018	0.854477	1.12806
1	43	Female	Jefferson County	No	No	No	No	Yes	No	Work part-time	Married	Yes	No	Extremely concerned		Extremely concerned	Extremely concerned	Health impacts of COVID-19	High school graduate or GED	$75,000 - $99,999		89 County region	35-44	1	No	No	Female 35 thru 44	1	0.833217	0.833217	1.32018	1.32018	0.802961	1.06005
1	57	Male	Carter County	No	No	No	No	Yes	No	Stay-at-Home Caregiver	Married	No	Yes	Somewhat concerned	Somewhat concerned	Extremely concerned	Extremely concerned	Health impacts of COVID-19	Bachelor's degree or higher	Less than $15,000		89 County region	55-64	1	No	No	Male 55 thru 65	1	1.08219	1.08219	1.32018	1.32018	1.10949	1.46473
1	41	Male	Montgomery County	No	No	No	No	Yes	No	Work full-time	Living with someone	Yes	Yes	Very concerned	Very concerned	Very concerned	Very concerned	Health impacts of COVID-19	Less than high school graduate	$25,000 - $34,999		89 County region	35-44	1	No	No	Male 35 thru 44	1	0.924303	0.924303	1.32018	1.32018	0.954872	1.2606
1	75	Female	Sevier County	No	No	No	No	Yes	No	Retired	Married	No	Yes	Somewhat concerned	Somewhat concerned	Very concerned	Very concerned	Economic impacts of COVID-19	High school graduate or GED	$35,000 - $49,999		89 County region	65+	1	No	No	Female 65+	1	1.07058	1.07058	1.32018	1.32018	1.05035	1.38664
1	43	Female	Bradley County	No	No	No	No	Yes	No	Work part-time	Married	Yes	No	Not very concerned	Not very concerned	Not very concerned	Somewhat concerned	Economic impacts of COVID-19	Some college or associate's degree	$50,000 - $74,999		89 County region	35-44	1	No	No	Female 35 thru 44	1	0.833217	0.833217	1.32018	1.32018	0.802961	1.06005
1	69	Female	Blount County	No	No	No	No	Yes	No	Retired	Married	No	Yes	Somewhat concerned	Somewhat concerned	Extremely concerned	Extremely concerned	Health impacts of COVID-19	Some college or associate's degree	$25,000 - $34,999		89 County region	65+	1	No	No	Female 65+	1	1.07058	1.07058	1.32018	1.32018	1.05035	1.38664
1	25	Male	Montgomery County	No	No	Yes	No	No	No	Work part-time	Single	Yes	No	Extremely concerned	Very concerned	Somewhat concerned	Extremely concerned	Health impacts of COVID-19	High school graduate or GED	Less than $15,000		89 County region	25-34	1	No	No	Male 25 thru 34	0.312422	1.23146	0.384736	1.32018	0.412453	1.31307	0.541579	1.15163	0.719589
1	69	Female	Crockett County	No	No	No	No	Yes	No	Retired	Married	Yes	Yes	Extremely concerned	Extremely concerned	Extremely concerned	Extremely concerned	Health impacts of COVID-19	Some college or associate's degree	$35,000 - $49,999		89 County region	65+	1	No	No	Female 65+	1	1.07058	1.07058	1.32018	1.32018	1.05035	1.38664
1	32	Female	Rutherford County	Yes	No	No	No	No	No	Work part-time	Living with someone	No	No	Extremely concerned	Extremely concerned	Not very concerned	Very concerned	Health impacts of COVID-19	High school graduate or GED	$15,000 - $24,999		89 County region	25-34	1	Yes	No	Female 25 thru 34	1	0.809019	0.809019	1.32018	1.32018	0.854477	1.12806
1	46	Female	Cheatham County	No	No	No	No	Yes	No	Work full-time	Single	No	No	Not very concerned	Not very concerned	Somewhat concerned	Extremely concerned	Economic impacts of COVID-19	Bachelor's degree or higher	$50,000 - $74,999		89 County region	45-54	1	No	No	Female 45 thru 54	1	0.873441	0.873441	1.32018	1.32018	0.850522	1.12284
1	63	Female	Johnson County	No	No	No	No	Yes	No	Work full-time	Married	Yes	Yes	Extremely concerned	Extremely concerned	Extremely concerned	Extremely concerned	Health impacts of COVID-19	Some college or associate's degree	$35,000 - $49,999		89 County region	55-64	1	No	No	Female 55 thru 64	1	0.871068	0.871068	1.32018	1.32018	0.862899	1.13918
1	45	Female	Scott County	No	No	No	No	Yes	No	Stay-at-Home Caregiver	Married	No	No	Not at all concerned	Not very concerned	Not very concerned	Not very concerned	Economic impacts of COVID-19	Some college or associate's degree	Less than $15,000		89 County region	45-54	1	No	No	Female 45 thru 54	1	0.873441	0.873441	1.32018	1.32018	0.850522	1.12284
1	69	Female	Greene County	No	No	No	No	Yes	No	Work part-time	Married	No	Yes	Extremely concerned	Extremely concerned	Extremely concerned	Extremely concerned	Health impacts of COVID-19	High school graduate or GED	$75,000 - $99,999		89 County region	65+	1	No	No	Female 65+	1	1.07058	1.07058	1.32018	1.32018	1.05035	1.38664
1	40	Male	Wilson County	No	No	No	No	Yes	No	Stay-at-Home Caregiver	Married	Yes	No	Somewhat concerned	Somewhat concerned	Somewhat concerned	Somewhat concerned	Economic impacts of COVID-19	Bachelor's degree or higher	$50,000 - $74,999		89 County region	35-44	1	No	No	Male 35 thru 44	1	0.924303	0.924303	1.32018	1.32018	0.954872	1.2606
1	37	Female	Fentress County	No	No	No	No	Yes	No	Unemployed	Separated	No	Yes	Not very concerned	Not very concerned	Not very concerned	Somewhat concerned	Economic impacts of COVID-19	High school graduate or GED	Less than $15,000		89 County region	35-44	1	No	No	Female 35 thru 44	1	0.833217	0.833217	1.32018	1.32018	0.802961	1.06005
1	33	Female	Sumner County	No	No	No	No	Yes	No	Work full-time	Married	Yes	No	Not very concerned	Somewhat concerned	Somewhat concerned	Very concerned	Economic impacts of COVID-19	High school graduate or GED	$50,000 - $74,999		89 County region	25-34	1	No	No	Female 25 thru 34	1	0.809019	0.809019	1.32018	1.32018	0.854477	1.12806
1	34	Female	Bradley County	No	No	No	Yes	Yes	No	Work full-time	Single	No	No	Very concerned	Somewhat concerned	Somewhat concerned	Extremely concerned	Economic impacts of COVID-19	Bachelor's degree or higher	$35,000 - $49,999		89 County region	25-34	2	No	No	Female 25 thru 34	1	0.809019	0.809019	1.32018	1.32018	0.854477	1.12806
1	30	Female	Hamblen County	No	No	No	No	Yes	No	Work full-time	Married	Yes	No	Not very concerned	Not very concerned	Somewhat concerned	Very concerned	Economic impacts of COVID-19	Bachelor's degree or higher	$75,000 - $99,999		89 County region	25-34	1	No	No	Female 25 thru 34	1	0.809019	0.809019	1.32018	1.32018	0.854477	1.12806
1	39	Female	Cheatham County	No	No	No	No	Yes	No	Looking for work	Separated	Yes	No	Very concerned	Very concerned	Extremely concerned	Extremely concerned	Health impacts of COVID-19	Some college or associate's degree	Less than $15,000		89 County region	35-44	1	No	No	Female 35 thru 44	1	0.833217	0.833217	1.32018	1.32018	0.802961	1.06005
1	76	Female	Sumner County	No	No	No	No	Yes	No	Retired	Married	No	Yes	Not very concerned	Not very concerned	Somewhat concerned	Somewhat concerned	Economic impacts of COVID-19	High school graduate or GED	$35,000 - $49,999		89 County region	65+	1	No	No	Female 65+	1	1.07058	1.07058	1.32018	1.32018	1.05035	1.38664
1	66	Male	Carroll County	No	No	No	No	Yes	No	Retired	Single	No	No	Very concerned	Extremely concerned	Extremely concerned	Extremely concerned	Health impacts of COVID-19	Some college or associate's degree	$25,000 - $34,999		89 County region	65+	1	No	No	Male 65+	1	1.16223	1.16223	1.32018	1.32018	1.31733	1.73911
1	27	Male	Cumberland County	No	No	No	No	Yes	No	Unemployed	Divorced	Yes	No	Not very concerned	Somewhat concerned	Not very concerned	Somewhat concerned	Health impacts of COVID-19	High school graduate or GED	$25,000 - $34,999		89 County region	25-34	1	No	No	Male 25 thru 34	1	1.23146	1.23146	1.32018	1.32018	1.31307	1.73349
1	22	Female	Williamson County	No	Yes	No	No	No	No	Work full-time	Single	No	Yes	Very concerned	Extremely concerned	Very concerned	Extremely concerned	Economic impacts of COVID-19	Bachelor's degree or higher	$150,000 or more		89 County region	18-24	1	Yes	No	Female 18 thru 24	1	0.736171	0.736171	1.32018	1.32018	0.698121	0.921645
1	50	Female	Roane County	No	No	No	No	Yes	No	Work part-time	Married	Yes	Yes	Not at all concerned	Not very concerned	Not at all concerned	Not very concerned	Economic impacts of COVID-19	Some college or associate's degree	$50,000 - $74,999		89 County region	45-54	1	No	No	Female 45 thru 54	1	0.873441	0.873441	1.32018	1.32018	0.850522	1.12284
1	58	Male	Franklin County	No	No	No	No	Yes	No	Unemployed	Living with someone	No	Yes	Very concerned	Extremely concerned	Extremely concerned	Extremely concerned	Economic impacts of COVID-19	High school graduate or GED	$15,000 - $24,999		89 County region	55-64	1	No	No	Male 55 thru 65	1	1.08219	1.08219	1.32018	1.32018	1.10949	1.46473
1	51	Female	Morgan County	No	No	No	No	Yes	No	Work full-time	Living with someone	No	Yes	Not at all concerned	Not at all concerned	Not at all concerned	Not at all concerned	Economic impacts of COVID-19	High school graduate or GED	$15,000 - $24,999		89 County region	45-54	1	No	No	Female 45 thru 54	1	0.873441	0.873441	1.32018	1.32018	0.850522	1.12284
1	77	Female	Polk County	No	No	No	No	Yes	No	Unemployed	Single	No	No	Not very concerned	Not very concerned	Not very concerned	Somewhat concerned	Economic impacts of COVID-19	High school graduate or GED	Less than $15,000		89 County region	65+	1	No	No	Female 65+	1	1.07058	1.07058	1.32018	1.32018	1.05035	1.38664
1	59	Male	Bradley County	No	No	No	No	Yes	No	Retired	Single	No	No	Not at all concerned	Not at all concerned	Not at all concerned	Not at all concerned	Economic impacts of COVID-19	Some college or associate's degree	$15,000 - $24,999		89 County region	55-64	1	No	No	Male 55 thru 65	1	1.08219	1.08219	1.32018	1.32018	1.10949	1.46473
1	53	Male	Bradley County	No	No	No	No	Yes	No		Married	No	No	Not very concerned	Somewhat concerned	Somewhat concerned	Very concerned	Economic impacts of COVID-19	Some college or associate's degree	$50,000 - $74,999		89 County region	45-54	1	No	No	Male 45 thru 54	1	1.57634	1.57634	1.32018	1.32018	1.43334	1.89227
1	30	Male	Roane County	No	No	No	No	Yes	No	Work full-time	Married	Yes	No	Not very concerned	Not very concerned	Somewhat concerned	Somewhat concerned	Economic impacts of COVID-19	Some college or associate's degree	$50,000 - $74,999		89 County region	25-34	1	No	No	Male 25 thru 34	1	1.23146	1.23146	1.32018	1.32018	1.31307	1.73349
1	59	Female	Montgomery County	No	No	No	No	Yes	No	Work full-time	Married	No	Yes	Very concerned	Very concerned	Extremely concerned	Very concerned	Health impacts of COVID-19	Some college or associate's degree	$75,000 - $99,999		89 County region	55-64	1	No	No	Female 55 thru 64	1	0.871068	0.871068	1.32018	1.32018	0.862899	1.13918
1	55	Female	Cumberland County	No	No	No	No	Yes	No	Work full-time	Married	No	Yes	Not at all concerned	Not very concerned	Not at all concerned	Somewhat concerned	Economic impacts of COVID-19	Bachelor's degree or higher	$50,000 - $74,999		89 County region	55-64	1	No	No	Female 55 thru 64	1	0.871068	0.871068	1.32018	1.32018	0.862899	1.13918
1	55	Female	Roane County	No	No	No	No	Yes	No	Looking for work	Single	No	Yes	Somewhat concerned	Extremely concerned	Extremely concerned	Extremely concerned	Health impacts of COVID-19	High school graduate or GED	$35,000 - $49,999		89 County region	55-64	1	No	No	Female 55 thru 64	1	0.871068	0.871068	1.32018	1.32018	0.862899	1.13918
1	36	Male	Blount County	No	No	No	No	Yes	No	Work full-time	Single	No	No	Somewhat concerned	Somewhat concerned	Somewhat concerned	Very concerned	Economic impacts of COVID-19	Bachelor's degree or higher	$50,000 - $74,999		89 County region	35-44	1	No	No	Male 35 thru 44	1	0.924303	0.924303	1.32018	1.32018	0.954872	1.2606
1	27	Female	Putnam County	No	No	No	No	Yes	No	Work full-time	Married	No	No	Somewhat concerned	Very concerned		Extremely concerned	Economic impacts of COVID-19	Bachelor's degree or higher	$25,000 - $34,999		89 County region	25-34	1	No	No	Female 25 thru 34	1	0.809019	0.809019	1.32018	1.32018	0.854477	1.12806
1	25	Male	Blount County	No	No	No	No	Yes	No	Work part-time	Living with someone	No	Yes	Somewhat concerned	Very concerned	Extremely concerned	Extremely concerned	Health impacts of COVID-19	High school graduate or GED	$75,000 - $99,999		89 County region	25-34	1	No	No	Male 25 thru 34	1	1.23146	1.23146	1.32018	1.32018	1.31307	1.73349
1	23	Female	Sumner County	No	No	Yes	No	No	No	Work full-time	Single	No	Yes	Extremely concerned	Extremely concerned	Very concerned	Somewhat concerned	Health impacts of COVID-19	Bachelor's degree or higher	$75,000 - $99,999		89 County region	18-24	1	No	No	Female 18 thru 24	0.312422	0.736171	0.229996	1.32018	0.412453	0.698121	0.287942	0.394655	0.246598
1	65	Male	Carter County	No	No	No	No	Yes	No	Work part-time	Divorced	No	Yes	Extremely concerned	Extremely concerned	Extremely concerned	Extremely concerned	Health impacts of COVID-19	Some college or associate's degree	$25,000 - $34,999		89 County region	65+	1	No	No	Male 65+	1	1.16223	1.16223	1.32018	1.32018	1.31733	1.73911
1	39	Female	Williamson County	No	No	No	No	Yes	No	Looking for work	Married	No	Yes	Very concerned	Very concerned	Very concerned	Extremely concerned	Health impacts of COVID-19	Bachelor's degree or higher	$35,000 - $49,999		89 County region	35-44	1	No	No	Female 35 thru 44	1	0.833217	0.833217	1.32018	1.32018	0.802961	1.06005
1	49	Female	Obion County	No	No	No	No	Yes	No	Work full-time	Married	No	Yes	Somewhat concerned	Not very concerned	Not very concerned	Somewhat concerned	Economic impacts of COVID-19	Bachelor's degree or higher	$75,000 - $99,999		89 County region	45-54	1	No	No	Female 45 thru 54	1	0.873441	0.873441	1.32018	1.32018	0.850522	1.12284
1	31	Male	Cheatham County	No	No	No	No	No	Yes	Looking for work	Separated	No	No	Somewhat concerned	Extremely concerned	Extremely concerned	Very concerned	Health impacts of COVID-19	Less than high school graduate	Less than $15,000		89 County region	25-34	1	Yes	No	Male 25 thru 34	1	1.23146	1.23146	1.32018	1.32018	1.31307	1.73349
1	40	Male	Montgomery County	No	No	No	No	Yes	No	Work full-time	Single	No	No	Somewhat concerned	Somewhat concerned	Very concerned	Somewhat concerned	Health impacts of COVID-19	Some college or associate's degree	$25,000 - $34,999		89 County region	35-44	1	No	No	Male 35 thru 44	1	0.924303	0.924303	1.32018	1.32018	0.954872	1.2606
1	19	Female	Blount County	No	No	No	No	Yes	No	Student	Single	No	No	Somewhat concerned	Very concerned	Very concerned	Very concerned	Health impacts of COVID-19	Some college or associate's degree	$50,000 - $74,999		89 County region	18-24	1	No	No	Female 18 thru 24	1	0.736171	0.736171	1.32018	1.32018	0.698121	0.921645
1	38	Female	Sevier County	No	No	No	No	Yes	No	Work full-time	Separated	Yes	No	Extremely concerned	Extremely concerned	Extremely concerned	Extremely concerned	Health impacts of COVID-19	High school graduate or GED	$25,000 - $34,999		89 County region	35-44	1	No	No	Female 35 thru 44	1	0.833217	0.833217	1.32018	1.32018	0.802961	1.06005
1	39	Female	Houston County	No	No	No	No	Yes	No	Work part-time	Separated	Yes	No	Extremely concerned	Somewhat concerned	Very concerned	Very concerned	Health impacts of COVID-19	High school graduate or GED	$35,000 - $49,999		89 County region	35-44	1	No	No	Female 35 thru 44	1	0.833217	0.833217	1.32018	1.32018	0.802961	1.06005
1	62	Male	Washington County	No	No	No	No	Yes	No	Work full-time	Married	No	Yes	Somewhat concerned	Somewhat concerned	Extremely concerned	Very concerned	Health impacts of COVID-19	Bachelor's degree or higher	$50,000 - $74,999		89 County region	55-64	1	No	No	Male 55 thru 65	1	1.08219	1.08219	1.32018	1.32018	1.10949	1.46473
1	21	Female	Bradley County	No	No	No	No	Yes	No	Stay-at-Home Caregiver	Single	Yes	No	Extremely concerned	Very concerned	Very concerned	Very concerned	Health impacts of COVID-19	Some college or associate's degree	Less than $15,000		89 County region	18-24	1	No	No	Female 18 thru 24	1	0.736171	0.736171	1.32018	1.32018	0.698121	0.921645
1	18	Female	Putnam County	No	No	No	No	Yes	No	Work part-time	Living with someone	No	No	Not very concerned	Very concerned	Somewhat concerned	Very concerned	Health impacts of COVID-19	High school graduate or GED	Less than $15,000		89 County region	18-24	1	No	No	Female 18 thru 24	1	0.736171	0.736171	1.32018	1.32018	0.698121	0.921645
1	25	Female	Sumner County	No	No	No	No	Yes	No	Student	Single	No	Yes	Somewhat concerned	Very concerned	Very concerned	Very concerned	Economic impacts of COVID-19	Some college or associate's degree	$35,000 - $49,999		89 County region	25-34	1	No	No	Female 25 thru 34	1	0.809019	0.809019	1.32018	1.32018	0.854477	1.12806
1	61	Female	Greene County	No	No	No	No	Yes	No	Work part-time	Married	No	No	Not very concerned	Not very concerned	Somewhat concerned	Very concerned	Economic impacts of COVID-19	Bachelor's degree or higher	$150,000 or more		89 County region	55-64	1	No	No	Female 55 thru 64	1	0.871068	0.871068	1.32018	1.32018	0.862899	1.13918
1	28	Male	Crockett County	No	No	No	No	Yes	No	Work full-time	Married	Yes	No	Somewhat concerned	Somewhat concerned	Very concerned	Extremely concerned	Economic impacts of COVID-19	Bachelor's degree or higher	$75,000 - $99,999		89 County region	25-34	1	No	No	Male 25 thru 34	1	1.23146	1.23146	1.32018	1.32018	1.31307	1.73349
1	35	Female	Rutherford County	No	No	No	No	Yes	No	Work full-time	Married	Yes	No	Somewhat concerned	Somewhat concerned	Somewhat concerned	Somewhat concerned	Economic impacts of COVID-19	Bachelor's degree or higher	$100,000 - $149,999		89 County region	35-44	1	No	No	Female 35 thru 44	1	0.833217	0.833217	1.32018	1.32018	0.802961	1.06005
1	27	Female	Lincoln County	No	No	No	No	Yes	No	Work full-time	Single	No	No	Not very concerned	Not at all concerned	Somewhat concerned	Very concerned	Economic impacts of COVID-19	Some college or associate's degree	$15,000 - $24,999		89 County region	25-34	1	No	No	Female 25 thru 34	1	0.809019	0.809019	1.32018	1.32018	0.854477	1.12806
1	61	Female	Chester County	No	No	No	No	Yes	No	Retired	Divorced	No	No	Somewhat concerned	Somewhat concerned	Very concerned	Extremely concerned	Health impacts of COVID-19	Some college or associate's degree	$15,000 - $24,999		89 County region	55-64	1	No	No	Female 55 thru 64	1	0.871068	0.871068	1.32018	1.32018	0.862899	1.13918
1	59	Female	Washington County	No	No	No	No	Yes	No	Unemployed	Married	No	Yes	Somewhat concerned	Very concerned	Very concerned	Extremely concerned	Economic impacts of COVID-19	Some college or associate's degree	$15,000 - $24,999		89 County region	55-64	1	No	No	Female 55 thru 64	1	0.871068	0.871068	1.32018	1.32018	0.862899	1.13918
1	42	Male	Sumner County	No	No	No	No	Yes	No	Unemployed	Single	Yes	No	Somewhat concerned	Somewhat concerned	Extremely concerned	Extremely concerned	Economic impacts of COVID-19	Bachelor's degree or higher	$75,000 - $99,999		89 County region	35-44	1	No	No	Male 35 thru 44	1	0.924303	0.924303	1.32018	1.32018	0.954872	1.2606
1	44	Female	DeKalb County	No	No	No	No	Yes	No	Stay-at-Home Caregiver	Married	Yes	No	Somewhat concerned	Very concerned		Extremely concerned	Economic impacts of COVID-19	Some college or associate's degree	$50,000 - $74,999		89 County region	35-44	1	No	No	Female 35 thru 44	1	0.833217	0.833217	1.32018	1.32018	0.802961	1.06005
1	31	Male	Hamblen County	No	No	No	No	No	Yes	Student	Dating	No	No	Very concerned	Extremely concerned	Extremely concerned	Extremely concerned	Economic impacts of COVID-19	Bachelor's degree or higher	Less than $15,000		89 County region	25-34	1	Yes	No	Male 25 thru 34	1	1.23146	1.23146	1.32018	1.32018	1.31307	1.73349
1	47	Female	Putnam County	No	No	No	No	Yes	No	Work full-time	Dating	No	Yes	Not at all concerned	Not very concerned	Very concerned	Extremely concerned	Economic impacts of COVID-19	Bachelor's degree or higher	$50,000 - $74,999		89 County region	45-54	1	No	No	Female 45 thru 54	1	0.873441	0.873441	1.32018	1.32018	0.850522	1.12284
1	47	Female	Sevier County	No	No	No	No	Yes	No	Work full-time	Married	No	No	Not very concerned	Not very concerned	Not very concerned	Very concerned	Economic impacts of COVID-19	Bachelor's degree or higher	$50,000 - $74,999		89 County region	45-54	1	No	No	Female 45 thru 54	1	0.873441	0.873441	1.32018	1.32018	0.850522	1.12284
1	36	Female	Monroe County	No	No	No	No	Yes	No	Unemployed	Divorced	No	No	Extremely concerned	Very concerned	Extremely concerned	Extremely concerned	Economic impacts of COVID-19	High school graduate or GED	$15,000 - $24,999		89 County region	35-44	1	No	No	Female 35 thru 44	1	0.833217	0.833217	1.32018	1.32018	0.802961	1.06005
1	59	Female	Anderson County	No	No	No	No	Yes	No	Stay-at-Home Caregiver	Married	No	Yes	Extremely concerned	Extremely concerned	Extremely concerned	Extremely concerned	Economic impacts of COVID-19	Bachelor's degree or higher	$100,000 - $149,999		89 County region	55-64	1	No	No	Female 55 thru 64	1	0.871068	0.871068	1.32018	1.32018	0.862899	1.13918
1	52	Female	Claiborne County	No	No	No	No	Yes	No	Stay-at-Home Caregiver	Married	No	Yes	Somewhat concerned	Somewhat concerned	Somewhat concerned	Somewhat concerned	Economic impacts of COVID-19	High school graduate or GED	$15,000 - $24,999		89 County region	45-54	1	No	No	Female 45 thru 54	1	0.873441	0.873441	1.32018	1.32018	0.850522	1.12284
1	56	Female	Bledsoe County	No	No	No	No	Yes	No	Unemployed	Divorced	No	No	Somewhat concerned	Somewhat concerned	Somewhat concerned	Very concerned	Health impacts of COVID-19	Less than high school graduate	Less than $15,000		89 County region	55-64	1	No	No	Female 55 thru 64	1	0.871068	0.871068	1.32018	1.32018	0.862899	1.13918
1	54	Female	Robertson County	No	No	No	No	Yes	No	Work full-time	Divorced	No	Yes	Very concerned	Extremely concerned	Extremely concerned	Extremely concerned	Health impacts of COVID-19	High school graduate or GED	$50,000 - $74,999		89 County region	45-54	1	No	No	Female 45 thru 54	1	0.873441	0.873441	1.32018	1.32018	0.850522	1.12284
1	40	Female	Humphreys County	No	No	No	No	Yes	No	Work part-time	Married	Yes	No	Very concerned	Somewhat concerned	Very concerned	Extremely concerned	Economic impacts of COVID-19	Bachelor's degree or higher	$35,000 - $49,999		89 County region	35-44	1	No	No	Female 35 thru 44	1	0.833217	0.833217	1.32018	1.32018	0.802961	1.06005
1	23	Female	Williamson County	No	No	No	No	Yes	No		Single	Yes	Yes	Extremely concerned	Very concerned	Extremely concerned	Extremely concerned	Health impacts of COVID-19	Some college or associate's degree	$15,000 - $24,999		89 County region	18-24	1	No	No	Female 18 thru 24	1	0.736171	0.736171	1.32018	1.32018	0.698121	0.921645
1	20	Female	Henry County	No	No	No	No	Yes	No	Student	Single	No	No	Not very concerned	Not very concerned	Somewhat concerned	Very concerned	Economic impacts of COVID-19	High school graduate or GED	Less than $15,000		89 County region	18-24	1	No	No	Female 18 thru 24	1	0.736171	0.736171	1.32018	1.32018	0.698121	0.921645
1	35	Female	Hamblen County	No	No	No	No	Yes	No	Work full-time	Married	Yes	No	Somewhat concerned	Somewhat concerned	Very concerned	Extremely concerned	Economic impacts of COVID-19	Bachelor's degree or higher	$75,000 - $99,999		89 County region	35-44	1	No	No	Female 35 thru 44	1	0.833217	0.833217	1.32018	1.32018	0.802961	1.06005
1	57	Female	Hawkins County	No	No	No	No	Yes	No	Work full-time	Divorced	Yes	No	Somewhat concerned	Very concerned	Very concerned	Very concerned	Health impacts of COVID-19	Bachelor's degree or higher	$25,000 - $34,999		89 County region	55-64	1	No	No	Female 55 thru 64	1	0.871068	0.871068	1.32018	1.32018	0.862899	1.13918
1	50	Female	Bedford County	No	No	No	No	Yes	No	Stay-at-Home Caregiver	Married	Yes	No	Not at all concerned	Not at all concerned	Not at all concerned	Somewhat concerned	Economic impacts of COVID-19	Some college or associate's degree	$75,000 - $99,999		89 County region	45-54	1	No	No	Female 45 thru 54	1	0.873441	0.873441	1.32018	1.32018	0.850522	1.12284
1	38	Female	Sumner County	No	No	No	No	Yes	No	Work full-time	Divorced	Yes	No	Somewhat concerned	Somewhat concerned	Somewhat concerned	Very concerned	Economic impacts of COVID-19	Some college or associate's degree	$15,000 - $24,999		89 County region	35-44	1	No	No	Female 35 thru 44	1	0.833217	0.833217	1.32018	1.32018	0.802961	1.06005
1	20	Male	Rutherford County	No	Yes	No	No	No	No	Work full-time	Single	No	Yes	Somewhat concerned	Extremely concerned	Extremely concerned	Extremely concerned	Economic impacts of COVID-19	High school graduate or GED	$25,000 - $34,999		89 County region	18-24	1	Yes	No	Male 18 thru 24	1	1.24847	1.24847	1.32018	1.32018	1.24389	1.64216
1	43	Female	Dyer County	No	No	No	No	Yes	No	Unemployed	Divorced	No	Yes	Somewhat concerned	Not very concerned	Extremely concerned	Extremely concerned	Economic impacts of COVID-19	High school graduate or GED	$50,000 - $74,999		89 County region	35-44	1	No	No	Female 35 thru 44	1	0.833217	0.833217	1.32018	1.32018	0.802961	1.06005
1	55	Female	Wayne County	No	No	No	No	Yes	No	Work full-time	Living with someone	No	Yes	Not very concerned	Not very concerned	Somewhat concerned	Somewhat concerned	Economic impacts of COVID-19	Bachelor's degree or higher	$50,000 - $74,999		89 County region	55-64	1	No	No	Female 55 thru 64	1	0.871068	0.871068	1.32018	1.32018	0.862899	1.13918
1	42	Female	Lewis County	No	No	No	No	Yes	No	Looking for work	Living with someone	No	No	Not very concerned	Not very concerned	Not very concerned	Very concerned	Health impacts of COVID-19	High school graduate or GED	Less than $15,000		89 County region	35-44	1	No	No	Female 35 thru 44	1	0.833217	0.833217	1.32018	1.32018	0.802961	1.06005
1	62	Female	Wilson County	No	No	No	No	Yes	No	Work full-time	Married	No	Yes	Extremely concerned	Extremely concerned	Extremely concerned	Extremely concerned	Health impacts of COVID-19	Some college or associate's degree	$75,000 - $99,999		89 County region	55-64	1	No	No	Female 55 thru 64	1	0.871068	0.871068	1.32018	1.32018	0.862899	1.13918
1	33	Male	Henderson County	No	No	No	No	Yes	No	Work full-time	Divorced	Yes	No	Extremely concerned	Extremely concerned	Extremely concerned	Extremely concerned	Health impacts of COVID-19	Less than high school graduate	$50,000 - $74,999		89 County region	25-34	1	No	No	Male 25 thru 34	1	1.23146	1.23146	1.32018	1.32018	1.31307	1.73349
1	27	Female	Montgomery County	No	No	No	No	Yes	No	Stay-at-Home Caregiver	Married	Yes	No	Somewhat concerned	Extremely concerned	Extremely concerned	Extremely concerned	Economic impacts of COVID-19	High school graduate or GED	$50,000 - $74,999		89 County region	25-34	1	No	No	Female 25 thru 34	1	0.809019	0.809019	1.32018	1.32018	0.854477	1.12806
1	67	Male	Anderson County	No	No	No	No	Yes	No	Retired	Living with someone	No	Yes	Very concerned	Very concerned	Very concerned	Very concerned	Health impacts of COVID-19	Some college or associate's degree	$15,000 - $24,999		89 County region	65+	1	No	No	Male 65+	1	1.16223	1.16223	1.32018	1.32018	1.31733	1.73911
1	37	Female	Rutherford County	No	No	No	No	Yes	No	Work full-time	Divorced	Yes	No	Somewhat concerned	Very concerned	Extremely concerned	Extremely concerned	Economic impacts of COVID-19	Some college or associate's degree	$25,000 - $34,999		89 County region	35-44	1	No	No	Female 35 thru 44	1	0.833217	0.833217	1.32018	1.32018	0.802961	1.06005
1	28	Female	Jefferson County	No	No	No	No	Yes	No	Stay-at-Home Caregiver	Married	Yes	No	Somewhat concerned	Somewhat concerned	Somewhat concerned	Somewhat concerned	Economic impacts of COVID-19	Bachelor's degree or higher	$50,000 - $74,999		89 County region	25-34	1	No	No	Female 25 thru 34	1	0.809019	0.809019	1.32018	1.32018	0.854477	1.12806
1	20	Female	Montgomery County	No	Yes	No	Yes	No	No	Student	Single	Yes	No	Somewhat concerned	Somewhat concerned	Somewhat concerned	Very concerned	Health impacts of COVID-19	Some college or associate's degree	$25,000 - $34,999		89 County region	18-24	2	Yes	No	Female 18 thru 24	1	0.736171	0.736171	1.32018	1.32018	0.698121	0.921645
1	33	Female	Lauderdale County	No	No	No	No	Yes	No	Student	Single	No	Yes	Somewhat concerned	Somewhat concerned	Very concerned	Extremely concerned	Economic impacts of COVID-19	Bachelor's degree or higher	Less than $15,000		89 County region	25-34	1	No	No	Female 25 thru 34	1	0.809019	0.809019	1.32018	1.32018	0.854477	1.12806
1	22	Female	Weakley County	No	No	No	No	Yes	No	Unemployed	Living with someone	No	No	Not at all concerned	Somewhat concerned	Somewhat concerned	Extremely concerned	Health impacts of COVID-19	High school graduate or GED	$25,000 - $34,999		89 County region	18-24	1	No	No	Female 18 thru 24	1	0.736171	0.736171	1.32018	1.32018	0.698121	0.921645
1	58	Female	White County	No	No	No	No	Yes	No	Unemployed	Married	No	Yes	Not very concerned	Not very concerned	Somewhat concerned	Extremely concerned	Economic impacts of COVID-19	Bachelor's degree or higher	$25,000 - $34,999		89 County region	55-64	1	No	No	Female 55 thru 64	1	0.871068	0.871068	1.32018	1.32018	0.862899	1.13918
1	27	Female	Coffee County	No	No	No	Yes	No	No	Work part-time	Married	Yes	Yes	Somewhat concerned	Somewhat concerned	Somewhat concerned	Somewhat concerned	Economic impacts of COVID-19	High school graduate or GED	$25,000 - $34,999		89 County region	25-34	1	Yes	No	Female 25 thru 34	1	0.809019	0.809019	1.32018	1.32018	0.854477	1.12806
1	52	Female	Rutherford County	No	No	No	No	Yes	No	Work full-time	Married	No	No	Not at all concerned	Not at all concerned	Not at all concerned	Extremely concerned	Economic impacts of COVID-19	Bachelor's degree or higher	$100,000 - $149,999		89 County region	45-54	1	No	No	Female 45 thru 54	1	0.873441	0.873441	1.32018	1.32018	0.850522	1.12284
1	63	Female	Cocke County	No	No	No	No	Yes	No	Stay-at-Home Caregiver	Married	Yes	Yes	Somewhat concerned	Somewhat concerned	Very concerned	Extremely concerned	Health impacts of COVID-19	High school graduate or GED	$100,000 - $149,999		89 County region	55-64	1	No	No	Female 55 thru 64	1	0.871068	0.871068	1.32018	1.32018	0.862899	1.13918
1	18	Female	DeKalb County	No	No	No	No	Yes	No	Work part-time	Dating	No	No	Somewhat concerned	Not very concerned	Somewhat concerned	Very concerned	Health impacts of COVID-19	Some college or associate's degree	$150,000 or more		89 County region	18-24	1	No	No	Female 18 thru 24	1	0.736171	0.736171	1.32018	1.32018	0.698121	0.921645
1	51	Female	Morgan County	No	No	No	No	Yes	No	Unemployed	Single	No	Yes	Not at all concerned	Somewhat concerned	Not at all concerned	Not very concerned	Health impacts of COVID-19	Some college or associate's degree	$50,000 - $74,999		89 County region	45-54	1	No	No	Female 45 thru 54	1	0.873441	0.873441	1.32018	1.32018	0.850522	1.12284
1	21	Female	Rutherford County	No	No	Yes	No	No	No	Looking for work	Single	No	No	Somewhat concerned	Somewhat concerned	Very concerned	Extremely concerned	Economic impacts of COVID-19	Bachelor's degree or higher	$15,000 - $24,999		89 County region	18-24	1	No	No	Female 18 thru 24	0.312422	0.736171	0.229996	1.32018	0.412453	0.698121	0.287942	0.394655	0.246598
1	70	Female	Rutherford County	Yes	No	No	No	Yes	No	Work part-time	Divorced	No	Yes	Somewhat concerned	Very concerned	Somewhat concerned	Very concerned	Economic impacts of COVID-19	High school graduate or GED	$25,000 - $34,999		89 County region	65+	2	No	No	Female 65+	1	1.07058	1.07058	1.32018	1.32018	1.05035	1.38664
1	30	Female	Williamson County	No	No	No	No	Yes	No	Unemployed	Separated	Yes	No	Not at all concerned	Somewhat concerned	Somewhat concerned	Somewhat concerned	Economic impacts of COVID-19	Less than high school graduate	Less than $15,000		89 County region	25-34	1	No	No	Female 25 thru 34	1	0.809019	0.809019	1.32018	1.32018	0.854477	1.12806
1	48	Female	Hamblen County	No	No	No	No	Yes	No	Unemployed	Divorced	No	Yes	Somewhat concerned	Very concerned	Very concerned	Extremely concerned	Health impacts of COVID-19	High school graduate or GED	$50,000 - $74,999		89 County region	45-54	1	No	No	Female 45 thru 54	1	0.873441	0.873441	1.32018	1.32018	0.850522	1.12284
1	20	Male	Hamblen County	No	No	No	No	Yes	No	Looking for work	Dating	No	Yes	Not very concerned	Not very concerned	Somewhat concerned	Somewhat concerned	Economic impacts of COVID-19	Some college or associate's degree	$100,000 - $149,999		89 County region	18-24	1	No	No	Male 18 thru 24	1	1.24847	1.24847	1.32018	1.32018	1.24389	1.64216
1	41	Male	Tipton County	Yes	Yes	Yes	Yes	Yes	No	Work full-time	Married	Yes	No	Very concerned	Somewhat concerned	Somewhat concerned	Very concerned	Health impacts of COVID-19	Bachelor's degree or higher	$75,000 - $99,999		89 County region	35-44	5	No	No	Male 35 thru 44	0.312422	0.924303	0.288773	1.32018	0.412453	0.954872	0.39384	1.07527	0.671879
1	62	Male	Weakley County	No	No	No	No	Yes	No	Work part-time	Single	No	No	Not very concerned	Not very concerned	Not very concerned	Somewhat concerned	Economic impacts of COVID-19	Bachelor's degree or higher	$35,000 - $49,999		89 County region	55-64	1	No	No	Male 55 thru 65	1	1.08219	1.08219	1.32018	1.32018	1.10949	1.46473
1	60	Female	Clay County	No	No	No	No	Yes	No	Looking for work	Married	No	Yes	Very concerned	Very concerned	Extremely concerned	Extremely concerned	Health impacts of COVID-19	Some college or associate's degree	$50,000 - $74,999		89 County region	55-64	1	No	No	Female 55 thru 64	1	0.871068	0.871068	1.32018	1.32018	0.862899	1.13918
1	29	Male	Carter County	No	No	No	No	Yes	No	Work full-time	Single	No	No	Extremely concerned	Very concerned	Extremely concerned	Extremely concerned	Economic impacts of COVID-19	Some college or associate's degree	$25,000 - $34,999		89 County region	25-34	1	No	No	Male 25 thru 34	1	1.23146	1.23146	1.32018	1.32018	1.31307	1.73349
1	20	Female	Claiborne County	No	No	No	No	Yes	No	Work full-time	Single	No	No	Very concerned	Extremely concerned	Extremely concerned	Extremely concerned	Health impacts of COVID-19	Less than high school graduate	$100,000 - $149,999		89 County region	18-24	1	No	No	Female 18 thru 24	1	0.736171	0.736171	1.32018	1.32018	0.698121	0.921645
1	22	Female	Dyer County	No	No	No	No	No	Yes	Work part-time	Divorced	No	No	Not at all concerned	Not very concerned	Extremely concerned	Not very concerned	Economic impacts of COVID-19	Bachelor's degree or higher	$150,000 or more		89 County region	18-24	1	Yes	No	Female 18 thru 24	1	0.736171	0.736171	1.32018	1.32018	0.698121	0.921645
1	41	Female	Dickson County	No	No	No	No	Yes	No	Stay-at-Home Caregiver	Married	Yes	No	Not very concerned	Not very concerned	Somewhat concerned	Somewhat concerned	Economic impacts of COVID-19	Some college or associate's degree	$50,000 - $74,999		89 County region	35-44	1	No	No	Female 35 thru 44	1	0.833217	0.833217	1.32018	1.32018	0.802961	1.06005
1	57	Female	Henderson County	No	No	No	No	Yes	No	Retired	Single	No	No	Very concerned	Very concerned	Extremely concerned	Very concerned	Economic impacts of COVID-19	Some college or associate's degree	Less than $15,000		89 County region	55-64	1	No	No	Female 55 thru 64	1	0.871068	0.871068	1.32018	1.32018	0.862899	1.13918
1	18	Female	Rutherford County	No	No	Yes	No	No	No	Student	Single	No	No	Not very concerned	Very concerned	Very concerned	Extremely concerned	Economic impacts of COVID-19	High school graduate or GED	$35,000 - $49,999		89 County region	18-24	1	No	No	Female 18 thru 24	0.312422	0.736171	0.229996	1.32018	0.412453	0.698121	0.287942	0.394655	0.246598
1	44	Female	Cheatham County	No	No	No	No	Yes	No	Unemployed	Single	No	Yes	Very concerned	Very concerned	Extremely concerned	Very concerned	Health impacts of COVID-19	High school graduate or GED	Less than $15,000		89 County region	35-44	1	No	No	Female 35 thru 44	1	0.833217	0.833217	1.32018	1.32018	0.802961	1.06005
1	62	Female	Montgomery County	No	No	Yes	No	No	No	Retired	Married	Yes	No	Not at all concerned	Not very concerned	Not very concerned	Not at all concerned	Economic impacts of COVID-19	Some college or associate's degree	$150,000 or more		89 County region	55-64	1	No	No	Female 55 thru 64	0.312422	0.871068	0.272141	1.32018	0.412453	0.862899	0.355906	1.04624	0.653738
1	18	Female	Wilson County	No	No	No	No	Yes	No	Student	Single	No	Yes	Somewhat concerned	Somewhat concerned	Very concerned	Very concerned	Economic impacts of COVID-19	High school graduate or GED	$75,000 - $99,999		89 County region	18-24	1	No	No	Female 18 thru 24	1	0.736171	0.736171	1.32018	1.32018	0.698121	0.921645
1	41	Male	Cumberland County	No	No	No	No	Yes	No	Work full-time	Divorced	Yes	Yes	Very concerned	Extremely concerned	Extremely concerned	Extremely concerned	Health impacts of COVID-19	Some college or associate's degree	$15,000 - $24,999		89 County region	35-44	1	No	No	Male 35 thru 44	1	0.924303	0.924303	1.32018	1.32018	0.954872	1.2606
1	59	Female	Union County	No	No	No	No	Yes	No	Work part-time	Married	No	Yes	Somewhat concerned	Somewhat concerned	Very concerned	Extremely concerned	Economic impacts of COVID-19	High school graduate or GED	$50,000 - $74,999		89 County region	55-64	1	No	No	Female 55 thru 64	1	0.871068	0.871068	1.32018	1.32018	0.862899	1.13918
1	32	Male	Sevier County	No	No	Yes	No	No	No	Work full-time	Separated	No	No	Somewhat concerned	Somewhat concerned	Somewhat concerned	Somewhat concerned	Health impacts of COVID-19	Bachelor's degree or higher	$25,000 - $34,999		89 County region	25-34	1	No	No	Male 25 thru 34	0.312422	1.23146	0.384736	1.32018	0.412453	1.31307	0.541579	1.15163	0.719589
1	23	Female	Carter County	No	No	No	No	Yes	No	Student	Single	No	No	Very concerned	Very concerned	Very concerned	Very concerned	Economic impacts of COVID-19	High school graduate or GED	$50,000 - $74,999		89 County region	18-24	1	No	No	Female 18 thru 24	1	0.736171	0.736171	1.32018	1.32018	0.698121	0.921645
1	27	Female	Lawrence County	No	No	No	No	Yes	No	Stay-at-Home Caregiver	Dating	Yes	Yes	Not very concerned	Not very concerned	Extremely concerned	Extremely concerned	Economic impacts of COVID-19	Some college or associate's degree	$100,000 - $149,999		89 County region	25-34	1	No	No	Female 25 thru 34	1	0.809019	0.809019	1.32018	1.32018	0.854477	1.12806
1	62	Male	Blount County	No	No	No	No	Yes	No	Retired	Married	No	Yes	Not very concerned	Not very concerned	Not very concerned	Very concerned	Economic impacts of COVID-19	Less than high school graduate	$35,000 - $49,999		89 County region	55-64	1	No	No	Male 55 thru 65	1	1.08219	1.08219	1.32018	1.32018	1.10949	1.46473
1	26	Female	Carter County	No	No	No	No	Yes	No	Unemployed	Single	Yes	Yes	Somewhat concerned	Extremely concerned	Very concerned	Extremely concerned	Health impacts of COVID-19	Some college or associate's degree	Less than $15,000		89 County region	25-34	1	No	No	Female 25 thru 34	1	0.809019	0.809019	1.32018	1.32018	0.854477	1.12806
1	18	Female	Sumner County	No	Yes	No	No	No	No	Student	Single	No	Yes	Somewhat concerned	Not very concerned	Very concerned	Extremely concerned	Economic impacts of COVID-19	Some college or associate's degree	$35,000 - $49,999		89 County region	18-24	1	Yes	No	Female 18 thru 24	1	0.736171	0.736171	1.32018	1.32018	0.698121	0.921645
1	19	Female	Rutherford County	No	No	Yes	No	No	No	Student	Single	Yes	Yes	Extremely concerned	Very concerned	Extremely concerned	Very concerned	Economic impacts of COVID-19	Less than high school graduate	$50,000 - $74,999		89 County region	18-24	1	No	No	Female 18 thru 24	0.312422	0.736171	0.229996	1.32018	0.412453	0.698121	0.287942	0.394655	0.246598
1	54	Female	Rutherford County	No	No	No	No	Yes	No	Unemployed	Single	No	No	Not very concerned	Somewhat concerned	Somewhat concerned	Very concerned	Economic impacts of COVID-19	Some college or associate's degree	$15,000 - $24,999		89 County region	45-54	1	No	No	Female 45 thru 54	1	0.873441	0.873441	1.32018	1.32018	0.850522	1.12284
1	65	Male	Montgomery County	No	No	No	No	Yes	No	Retired	Married	No	Yes	Very concerned	Very concerned	Very concerned	Somewhat concerned	Health impacts of COVID-19	Bachelor's degree or higher	$100,000 - $149,999		89 County region	65+	1	No	No	Male 65+	1	1.16223	1.16223	1.32018	1.32018	1.31733	1.73911
1	20	Male	Blount County	No	No	No	No	Yes	No	Work full-time	Married	No	No	Somewhat concerned	Very concerned	Extremely concerned	Very concerned	Health impacts of COVID-19	High school graduate or GED	$15,000 - $24,999		89 County region	18-24	1	No	No	Male 18 thru 24	1	1.24847	1.24847	1.32018	1.32018	1.24389	1.64216
1	20	Female	Loudon County	No	No	No	No	Yes	No	Work full-time	Single	No	No	Not at all concerned	Somewhat concerned	Somewhat concerned	Very concerned	Economic impacts of COVID-19	Some college or associate's degree	$35,000 - $49,999		89 County region	18-24	1	No	No	Female 18 thru 24	1	0.736171	0.736171	1.32018	1.32018	0.698121	0.921645
1	61	Female	Rutherford County	No	No	No	No	Yes	No	Retired	Married	Yes	No	Somewhat concerned	Very concerned	Extremely concerned	Extremely concerned	Health impacts of COVID-19	High school graduate or GED	$15,000 - $24,999		89 County region	55-64	1	No	No	Female 55 thru 64	1	0.871068	0.871068	1.32018	1.32018	0.862899	1.13918
1	34	Female	Greene County	No	No	No	No	Yes	No	Stay-at-Home Caregiver	Married	Yes	No	Somewhat concerned	Somewhat concerned	Not very concerned	Extremely concerned	Health impacts of COVID-19	High school graduate or GED	$15,000 - $24,999		89 County region	25-34	1	No	No	Female 25 thru 34	1	0.809019	0.809019	1.32018	1.32018	0.854477	1.12806
1	28	Male	Montgomery County	No	No	No	No	Yes	No	Work full-time	Living with someone	No	No	Very concerned	Very concerned	Very concerned	Very concerned	Economic impacts of COVID-19	Some college or associate's degree	$35,000 - $49,999		89 County region	25-34	1	No	No	Male 25 thru 34	1	1.23146	1.23146	1.32018	1.32018	1.31307	1.73349
1	64	Female	Montgomery County	No	No	No	No	Yes	No	Retired	Married	No	Yes	Very concerned	Extremely concerned	Extremely concerned	Extremely concerned	Health impacts of COVID-19	Some college or associate's degree	$35,000 - $49,999		89 County region	55-64	1	No	No	Female 55 thru 64	1	0.871068	0.871068	1.32018	1.32018	0.862899	1.13918
1	30	Female	Lawrence County	No	No	No	No	Yes	No	Work full-time	Living with someone	Yes	No	Not at all concerned	Not at all concerned	Very concerned	Very concerned	Health impacts of COVID-19	High school graduate or GED	$15,000 - $24,999		89 County region	25-34	1	No	No	Female 25 thru 34	1	0.809019	0.809019	1.32018	1.32018	0.854477	1.12806
1	34	Female	Wayne County	No	No	No	No	Yes	No	Stay-at-Home Caregiver	Separated	Yes	No	Very concerned	Very concerned	Extremely concerned	Very concerned	Economic impacts of COVID-19	High school graduate or GED	$15,000 - $24,999		89 County region	25-34	1	No	No	Female 25 thru 34	1	0.809019	0.809019	1.32018	1.32018	0.854477	1.12806
1	65	Female	Rutherford County	No	No	No	No	Yes	No	Work full-time	Divorced	No	No	Not very concerned	Not very concerned	Not at all concerned	Somewhat concerned	Economic impacts of COVID-19	Some college or associate's degree	$50,000 - $74,999		89 County region	65+	1	No	No	Female 65+	1	1.07058	1.07058	1.32018	1.32018	1.05035	1.38664
1	73	Female	Carroll County	No	No	No	No	Yes	No	Retired	Divorced	No	Yes	Extremely concerned	Extremely concerned	Extremely concerned	Extremely concerned	Health impacts of COVID-19	High school graduate or GED	$15,000 - $24,999		89 County region	65+	1	No	No	Female 65+	1	1.07058	1.07058	1.32018	1.32018	1.05035	1.38664
1	34	Female	Benton County	Yes	No	No	No	No	No	Work full-time	Married	Yes	Yes	Extremely concerned	Very concerned	Somewhat concerned	Very concerned	Health impacts of COVID-19	High school graduate or GED	$15,000 - $24,999		89 County region	25-34	1	Yes	No	Female 25 thru 34	1	0.809019	0.809019	1.32018	1.32018	0.854477	1.12806
1	53	Female	Hamblen County	No	No	No	No	Yes	No	Work full-time	Married	Yes	Yes	Very concerned	Very concerned	Very concerned	Extremely concerned	Health impacts of COVID-19	Some college or associate's degree	$75,000 - $99,999		89 County region	45-54	1	No	No	Female 45 thru 54	1	0.873441	0.873441	1.32018	1.32018	0.850522	1.12284
1	37	Female	Bledsoe County	Yes	No	No	No	No	No	Work full-time	Married	Yes	Yes	Not very concerned	Not at all concerned	Not at all concerned	Not at all concerned	Health impacts of COVID-19	High school graduate or GED	$15,000 - $24,999		89 County region	35-44	1	Yes	No	Female 35 thru 44	1	0.833217	0.833217	1.32018	1.32018	0.802961	1.06005
1	64	Male	Bradley County	No	No	No	No	Yes	No	Retired	Married	No	Yes	Not very concerned	Not at all concerned	Extremely concerned	Very concerned	Health impacts of COVID-19	Some college or associate's degree	$25,000 - $34,999		89 County region	55-64	1	No	No	Male 55 thru 65	1	1.08219	1.08219	1.32018	1.32018	1.10949	1.46473
1	19	Male	Dickson County	No	No	No	No	Yes	No	Work full-time	Single	No	Yes	Very concerned	Very concerned	Extremely concerned	Very concerned	Health impacts of COVID-19	High school graduate or GED	$50,000 - $74,999		89 County region	18-24	1	No	No	Male 18 thru 24	1	1.24847	1.24847	1.32018	1.32018	1.24389	1.64216
1	25	Male	Sevier County	No	No	No	No	Yes	No	Unemployed	Single	Yes	No	Not very concerned	Somewhat concerned	Very concerned	Very concerned	Economic impacts of COVID-19	High school graduate or GED	$15,000 - $24,999		89 County region	25-34	1	No	No	Male 25 thru 34	1	1.23146	1.23146	1.32018	1.32018	1.31307	1.73349
1	56	Female	McNairy County	No	No	No	No	Yes	No	Retired	Divorced	No	No	Not very concerned	Not very concerned	Somewhat concerned	Very concerned	Economic impacts of COVID-19	High school graduate or GED	$15,000 - $24,999		89 County region	55-64	1	No	No	Female 55 thru 64	1	0.871068	0.871068	1.32018	1.32018	0.862899	1.13918
1	64	Female	Hawkins County	No	No	No	No	Yes	No	Stay-at-Home Caregiver	Married	No	Yes	Somewhat concerned	Somewhat concerned	Very concerned	Very concerned	Health impacts of COVID-19	Bachelor's degree or higher	$50,000 - $74,999		89 County region	55-64	1	No	No	Female 55 thru 64	1	0.871068	0.871068	1.32018	1.32018	0.862899	1.13918
1	36	Female	Sevier County	No	No	No	No	Yes	No	Unemployed	Married	No	No	Very concerned	Very concerned	Very concerned	Extremely concerned	Health impacts of COVID-19	High school graduate or GED	Less than $15,000		89 County region	35-44	1	No	No	Female 35 thru 44	1	0.833217	0.833217	1.32018	1.32018	0.802961	1.06005
1	51	Male	Cheatham County	No	No	No	No	Yes	No	Work full-time	Married	Yes	No	Somewhat concerned	Very concerned	Very concerned	Very concerned	Economic impacts of COVID-19	High school graduate or GED	$35,000 - $49,999		89 County region	45-54	1	No	No	Male 45 thru 54	1	1.57634	1.57634	1.32018	1.32018	1.43334	1.89227
1	38	Male	Warren County	No	No	No	No	Yes	No	Work full-time	Single	No	Yes	Very concerned	Somewhat concerned	Very concerned	Extremely concerned	Economic impacts of COVID-19	High school graduate or GED	$35,000 - $49,999		89 County region	35-44	1	No	No	Male 35 thru 44	1	0.924303	0.924303	1.32018	1.32018	0.954872	1.2606
1	40	Male	Montgomery County	No	No	Yes	No	No	No	Work full-time	Married	Yes	No	Not at all concerned	Not very concerned	Not very concerned	Not very concerned	Economic impacts of COVID-19	Bachelor's degree or higher	$35,000 - $49,999		89 County region	35-44	1	No	No	Male 35 thru 44	0.312422	0.924303	0.288773	1.32018	0.412453	0.954872	0.39384	1.07527	0.671879
1	54	Male	Sevier County	No	No	No	No	Yes	No	Work full-time	Married	No	Yes	Not at all concerned	Not at all concerned	Not at all concerned	Not at all concerned	Economic impacts of COVID-19	High school graduate or GED	$35,000 - $49,999		89 County region	45-54	1	No	No	Male 45 thru 54	1	1.57634	1.57634	1.32018	1.32018	1.43334	1.89227
1	69	Female	Sumner County	No	No	No	No	Yes	No	Retired	Divorced	No	No	Very concerned	Very concerned	Extremely concerned	Extremely concerned	Health impacts of COVID-19	Some college or associate's degree	$15,000 - $24,999		89 County region	65+	1	No	No	Female 65+	1	1.07058	1.07058	1.32018	1.32018	1.05035	1.38664
1	19	Female	Fayette County	No	No	No	No	Yes	No	Looking for work	Dating	No	No	Somewhat concerned	Extremely concerned	Extremely concerned	Very concerned	Economic impacts of COVID-19	Less than high school graduate	Less than $15,000		89 County region	18-24	1	No	No	Female 18 thru 24	1	0.736171	0.736171	1.32018	1.32018	0.698121	0.921645
1	70	Female	Anderson County	No	No	No	No	Yes	No	Retired	Married	No	Yes	Somewhat concerned	Somewhat concerned	Somewhat concerned	Very concerned	Health impacts of COVID-19	Bachelor's degree or higher	$100,000 - $149,999		89 County region	65+	1	No	No	Female 65+	1	1.07058	1.07058	1.32018	1.32018	1.05035	1.38664
1	58	Female	McMinn County	No	No	No	No	Yes	No	Work part-time	Divorced	No	No	Not very concerned	Somewhat concerned	Somewhat concerned	Somewhat concerned	Health impacts of COVID-19	High school graduate or GED	Less than $15,000		89 County region	55-64	1	No	No	Female 55 thru 64	1	0.871068	0.871068	1.32018	1.32018	0.862899	1.13918
1	33	Male	Campbell County	No	No	No	No	Yes	No	Looking for work	Single	No	No	Extremely concerned	Extremely concerned	Extremely concerned	Extremely concerned	Health impacts of COVID-19	Some college or associate's degree	Less than $15,000		89 County region	25-34	1	No	No	Male 25 thru 34	1	1.23146	1.23146	1.32018	1.32018	1.31307	1.73349
1	67	Male	Gibson County	No	No	No	No	Yes	No	Work part-time	Married	No	Yes	Extremely concerned	Very concerned	Extremely concerned	Extremely concerned	Health impacts of COVID-19	Some college or associate's degree	$75,000 - $99,999		89 County region	65+	1	No	No	Male 65+	1	1.16223	1.16223	1.32018	1.32018	1.31733	1.73911
1	60	Female	Blount County	No	No	No	No	Yes	No	Work part-time	Married	Yes	Yes	Not very concerned	Not very concerned	Somewhat concerned	Very concerned	Economic impacts of COVID-19	Bachelor's degree or higher	$50,000 - $74,999		89 County region	55-64	1	No	No	Female 55 thru 64	1	0.871068	0.871068	1.32018	1.32018	0.862899	1.13918
1	62	Male	Dyer County	No	No	No	No	Yes	No	Retired	Married	No	Yes	Somewhat concerned	Somewhat concerned	Very concerned	Very concerned	Economic impacts of COVID-19	High school graduate or GED	Less than $15,000		89 County region	55-64	1	No	No	Male 55 thru 65	1	1.08219	1.08219	1.32018	1.32018	1.10949	1.46473
1	53	Female	Washington County	No	Yes	No	No	No	No	Unemployed	Married	No	Yes	Extremely concerned	Extremely concerned	Extremely concerned	Extremely concerned	Health impacts of COVID-19	Bachelor's degree or higher	$15,000 - $24,999		89 County region	45-54	1	Yes	No	Female 45 thru 54	1	0.873441	0.873441	1.32018	1.32018	0.850522	1.12284
1	52	Female	Cumberland County	No	No	No	No	Yes	No	Work part-time	Married	No	No	Very concerned	Very concerned	Very concerned	Very concerned	Health impacts of COVID-19	Some college or associate's degree	$25,000 - $34,999		89 County region	45-54	1	No	No	Female 45 thru 54	1	0.873441	0.873441	1.32018	1.32018	0.850522	1.12284
1	64	Female	Macon County	No	No	No	No	Yes	No	Unemployed	Divorced	Yes	Yes	Somewhat concerned	Very concerned	Somewhat concerned	Extremely concerned	Economic impacts of COVID-19	High school graduate or GED	Less than $15,000		89 County region	55-64	1	No	No	Female 55 thru 64	1	0.871068	0.871068	1.32018	1.32018	0.862899	1.13918
1	68	Female	Blount County	No	No	No	No	Yes	No	Retired	Married	No	Yes	Very concerned	Extremely concerned	Very concerned	Extremely concerned	Health impacts of COVID-19	Some college or associate's degree	$25,000 - $34,999		89 County region	65+	1	No	No	Female 65+	1	1.07058	1.07058	1.32018	1.32018	1.05035	1.38664
1	22	Female	Greene County	No	No	No	No	Yes	No	Work part-time	Married	No	No	Extremely concerned	Somewhat concerned	Somewhat concerned	Extremely concerned	Economic impacts of COVID-19	High school graduate or GED	$35,000 - $49,999		89 County region	18-24	1	No	No	Female 18 thru 24	1	0.736171	0.736171	1.32018	1.32018	0.698121	0.921645
1	22	Male	Montgomery County	No	No	No	Yes	No	No	Student	Single	No	No	Somewhat concerned	Somewhat concerned	Somewhat concerned	Not very concerned	Economic impacts of COVID-19	High school graduate or GED	$15,000 - $24,999		89 County region	18-24	1	Yes	No	Male 18 thru 24	1	1.24847	1.24847	1.32018	1.32018	1.24389	1.64216
1	70	Male	Greene County	No	No	No	No	Yes	No	Retired	Married	No	Yes	Somewhat concerned	Somewhat concerned	Very concerned	Very concerned	Health impacts of COVID-19	Some college or associate's degree	$25,000 - $34,999		89 County region	65+	1	No	No	Male 65+	1	1.16223	1.16223	1.32018	1.32018	1.31733	1.73911
1	18	Male	Smith County	No	No	No	No	Yes	No	Unemployed	Single	Yes	No	Somewhat concerned	Very concerned	Extremely concerned	Extremely concerned	Health impacts of COVID-19	High school graduate or GED	$25,000 - $34,999		89 County region	18-24	1	No	No	Male 18 thru 24	1	1.24847	1.24847	1.32018	1.32018	1.24389	1.64216
1	60	Female	Anderson County	No	No	No	No	Yes	No	Retired	Single	No	No	Somewhat concerned	Extremely concerned	Very concerned	Extremely concerned	Economic impacts of COVID-19	Some college or associate's degree	Less than $15,000		89 County region	55-64	1	No	No	Female 55 thru 64	1	0.871068	0.871068	1.32018	1.32018	0.862899	1.13918
1	65	Female	Robertson County	No	No	No	No	Yes	No	Stay-at-Home Caregiver	Married	No	Yes	Somewhat concerned	Somewhat concerned	Somewhat concerned	Very concerned	Economic impacts of COVID-19	High school graduate or GED	$25,000 - $34,999		89 County region	65+	1	No	No	Female 65+	1	1.07058	1.07058	1.32018	1.32018	1.05035	1.38664
1	73	Female	Washington County	No	No	No	No	Yes	No	Retired	Married	No	Yes	Very concerned	Somewhat concerned	Very concerned	Extremely concerned	Health impacts of COVID-19	Bachelor's degree or higher	$75,000 - $99,999		89 County region	65+	1	No	No	Female 65+	1	1.07058	1.07058	1.32018	1.32018	1.05035	1.38664
1	50	Female	Bradley County	No	No	No	No	Yes	No	Work full-time	Married	No	Yes	Very concerned	Very concerned	Extremely concerned	Extremely concerned	Economic impacts of COVID-19	Some college or associate's degree	$75,000 - $99,999		89 County region	45-54	1	No	No	Female 45 thru 54	1	0.873441	0.873441	1.32018	1.32018	0.850522	1.12284
1	24	Male	Coffee County	No	No	No	No	Yes	No	Work full-time	Married	No	No	Not very concerned	Not very concerned	Not very concerned	Not very concerned	Economic impacts of COVID-19	Bachelor's degree or higher	$35,000 - $49,999		89 County region	18-24	1	No	No	Male 18 thru 24	1	1.24847	1.24847	1.32018	1.32018	1.24389	1.64216
1	22	Female	Robertson County	No	No	No	No	Yes	No	Work full-time	Single	Yes	Yes	Not very concerned	Not very concerned	Somewhat concerned	Very concerned	Economic impacts of COVID-19	Some college or associate's degree	$15,000 - $24,999		89 County region	18-24	1	No	No	Female 18 thru 24	1	0.736171	0.736171	1.32018	1.32018	0.698121	0.921645
1	64	Female	Loudon County	No	No	No	No	Yes	No	Retired	Single	No	Yes	Somewhat concerned	Somewhat concerned	Very concerned	Somewhat concerned	Health impacts of COVID-19	Some college or associate's degree	$15,000 - $24,999		89 County region	55-64	1	No	No	Female 55 thru 64	1	0.871068	0.871068	1.32018	1.32018	0.862899	1.13918
1	55	Female	Rutherford County	No	No	No	No	Yes	No	Work full-time	Married	No	Yes	Not very concerned	Extremely concerned	Extremely concerned	Extremely concerned	Economic impacts of COVID-19	Bachelor's degree or higher	$150,000 or more		89 County region	55-64	1	No	No	Female 55 thru 64	1	0.871068	0.871068	1.32018	1.32018	0.862899	1.13918
1	69	Female	Sevier County	No	No	No	No	Yes	No	Retired	Divorced	No	Yes	Very concerned	Very concerned	Very concerned	Extremely concerned	Health impacts of COVID-19	Bachelor's degree or higher	$75,000 - $99,999		89 County region	65+	1	No	No	Female 65+	1	1.07058	1.07058	1.32018	1.32018	1.05035	1.38664
1	71	Male	Washington County	No	No	No	No	Yes	No	Retired	Married	No	Yes	Somewhat concerned	Somewhat concerned	Somewhat concerned	Very concerned	Health impacts of COVID-19	Bachelor's degree or higher	$100,000 - $149,999		89 County region	65+	1	No	No	Male 65+	1	1.16223	1.16223	1.32018	1.32018	1.31733	1.73911
1	57	Male	Tipton County	No	No	No	No	Yes	No	Retired	Married	Yes	Yes	Very concerned	Very concerned	Very concerned	Somewhat concerned	Health impacts of COVID-19	Some college or associate's degree	$25,000 - $34,999		89 County region	55-64	1	No	No	Male 55 thru 65	1	1.08219	1.08219	1.32018	1.32018	1.10949	1.46473
1	60	Male	Sumner County	No	No	No	No	Yes	No	Work full-time	Married	No	Yes	Not very concerned	Somewhat concerned	Very concerned	Very concerned	Health impacts of COVID-19	High school graduate or GED	$35,000 - $49,999		89 County region	55-64	1	No	No	Male 55 thru 65	1	1.08219	1.08219	1.32018	1.32018	1.10949	1.46473
1	22	Male	Monroe County	No	No	No	No	Yes	No	Work full-time	Married	Yes	No	Extremely concerned	Extremely concerned	Extremely concerned	Extremely concerned	Health impacts of COVID-19	High school graduate or GED	$25,000 - $34,999		89 County region	18-24	1	No	No	Male 18 thru 24	1	1.24847	1.24847	1.32018	1.32018	1.24389	1.64216
1	76	Male	Carter County	No	No	No	No	Yes	No	Retired	Married	No	Yes	Very concerned	Somewhat concerned	Somewhat concerned	Very concerned	Economic impacts of COVID-19	High school graduate or GED	$25,000 - $34,999		89 County region	65+	1	No	No	Male 65+	1	1.16223	1.16223	1.32018	1.32018	1.31733	1.73911
1	66	Female	Jefferson County	No	No	No	No	Yes	No	Retired	Married	No	Yes	Not at all concerned	Not at all concerned	Not at all concerned	Extremely concerned	Economic impacts of COVID-19	High school graduate or GED	$35,000 - $49,999		89 County region	65+	1	No	No	Female 65+	1	1.07058	1.07058	1.32018	1.32018	1.05035	1.38664
1	77	Female	Sumner County	No	No	No	No	Yes	No	Retired	Married	No	Yes	Extremely concerned	Very concerned	Extremely concerned	Extremely concerned	Health impacts of COVID-19	Bachelor's degree or higher	$75,000 - $99,999		89 County region	65+	1	No	No	Female 65+	1	1.07058	1.07058	1.32018	1.32018	1.05035	1.38664
1	31	Male	Anderson County	No	No	No	No	Yes	No	Work full-time	Married	Yes	No	Not very concerned	Not very concerned	Somewhat concerned	Somewhat concerned	Economic impacts of COVID-19	Bachelor's degree or higher	$50,000 - $74,999		89 County region	25-34	1	No	No	Male 25 thru 34	1	1.23146	1.23146	1.32018	1.32018	1.31307	1.73349
1	63	Male	Cocke County	No	No	No	No	Yes	No	Work full-time	Married	Yes	Yes	Somewhat concerned	Somewhat concerned	Very concerned	Extremely concerned	Economic impacts of COVID-19	Some college or associate's degree	$50,000 - $74,999		89 County region	55-64	1	No	No	Male 55 thru 65	1	1.08219	1.08219	1.32018	1.32018	1.10949	1.46473
1	37	Male	Putnam County	No	No	No	No	Yes	No	Work full-time	Married	Yes	No	Not very concerned	Not very concerned	Somewhat concerned	Very concerned	Economic impacts of COVID-19	Some college or associate's degree	$75,000 - $99,999		89 County region	35-44	1	No	No	Male 35 thru 44	1	0.924303	0.924303	1.32018	1.32018	0.954872	1.2606
1	46	Female	Loudon County	No	No	No	No	Yes	No	Work full-time	Living with someone	No	Yes	Somewhat concerned	Somewhat concerned	Extremely concerned	Extremely concerned	Economic impacts of COVID-19	High school graduate or GED	$25,000 - $34,999		89 County region	45-54	1	No	No	Female 45 thru 54	1	0.873441	0.873441	1.32018	1.32018	0.850522	1.12284
1	22	Male	Blount County	No	No	No	No	Yes	No	Unemployed	Single	No	Yes	Very concerned	Very concerned	Very concerned	Very concerned	Economic impacts of COVID-19	High school graduate or GED	$35,000 - $49,999		89 County region	18-24	1	No	No	Male 18 thru 24	1	1.24847	1.24847	1.32018	1.32018	1.24389	1.64216
1	51	Female	McNairy County	No	No	No	No	Yes	No	Work full-time	Single	Yes	Yes	Somewhat concerned	Somewhat concerned	Extremely concerned	Extremely concerned	Economic impacts of COVID-19	High school graduate or GED	$15,000 - $24,999		89 County region	45-54	1	No	No	Female 45 thru 54	1	0.873441	0.873441	1.32018	1.32018	0.850522	1.12284
1	41	Female	Morgan County	No	No	No	No	Yes	No	Unemployed	Single	Yes	Yes	Not very concerned	Not very concerned	Somewhat concerned	Somewhat concerned	Economic impacts of COVID-19	High school graduate or GED	$15,000 - $24,999		89 County region	35-44	1	No	No	Female 35 thru 44	1	0.833217	0.833217	1.32018	1.32018	0.802961	1.06005
1	76	Female	Hardin County	No	No	No	No	Yes	No	Work part-time	Living with someone	No	Yes	Very concerned	Very concerned	Very concerned	Extremely concerned	Health impacts of COVID-19	Some college or associate's degree	$35,000 - $49,999		89 County region	65+	1	No	No	Female 65+	1	1.07058	1.07058	1.32018	1.32018	1.05035	1.38664
1	62	Male	Cumberland County	No	No	No	No	Yes	No	Retired	Married	No	Yes	Somewhat concerned	Somewhat concerned	Somewhat concerned	Very concerned	Economic impacts of COVID-19	Bachelor's degree or higher	$100,000 - $149,999		89 County region	55-64	1	No	No	Male 55 thru 65	1	1.08219	1.08219	1.32018	1.32018	1.10949	1.46473
1	61	Male	Blount County	No	No	No	No	Yes	No	Work full-time	Divorced	No	Yes	Somewhat concerned	Somewhat concerned	Somewhat concerned	Very concerned	Health impacts of COVID-19	Bachelor's degree or higher	$25,000 - $34,999		89 County region	55-64	1	No	No	Male 55 thru 65	1	1.08219	1.08219	1.32018	1.32018	1.10949	1.46473
1	59	Female	Robertson County	No	No	No	No	Yes	No	Stay-at-Home Caregiver	Married	No	Yes	Very concerned	Somewhat concerned	Very concerned	Very concerned	Economic impacts of COVID-19	High school graduate or GED	$50,000 - $74,999		89 County region	55-64	1	No	No	Female 55 thru 64	1	0.871068	0.871068	1.32018	1.32018	0.862899	1.13918
1	24	Female	Wilson County	No	No	No	No	No	Yes	Retired	Married	No	No	I have already tested positive for COVID-19.	Not at all concerned	Not at all concerned	Not at all concerned	Economic impacts of COVID-19	Bachelor's degree or higher	$150,000 or more		89 County region	18-24	1	Yes	No	Female 18 thru 24	1	0.736171	0.736171	1.32018	1.32018	0.698121	0.921645
1	65	Female	Giles County	No	No	No	No	Yes	No	Retired	Married	No	Yes	Somewhat concerned	Somewhat concerned	Very concerned	Extremely concerned	Economic impacts of COVID-19	High school graduate or GED	$35,000 - $49,999		89 County region	65+	1	No	No	Female 65+	1	1.07058	1.07058	1.32018	1.32018	1.05035	1.38664
1	69	Female	Henry County	No	No	No	No	Yes	No	Retired	Married	No	Yes	Not very concerned	Very concerned	Very concerned	Very concerned	Health impacts of COVID-19	Bachelor's degree or higher	$50,000 - $74,999		89 County region	65+	1	No	No	Female 65+	1	1.07058	1.07058	1.32018	1.32018	1.05035	1.38664
1	43	Male	Williamson County	No	No	No	No	Yes	No	Work full-time	Married	Yes	No	Somewhat concerned	Somewhat concerned	Somewhat concerned	Very concerned	Economic impacts of COVID-19	Some college or associate's degree	$35,000 - $49,999		89 County region	35-44	1	No	No	Male 35 thru 44	1	0.924303	0.924303	1.32018	1.32018	0.954872	1.2606
1	43	Female	Carter County	No	No	No	No	Yes	No	Unemployed	Living with someone	No	Yes	Somewhat concerned	Very concerned	Very concerned	Very concerned	Health impacts of COVID-19	High school graduate or GED	$15,000 - $24,999		89 County region	35-44	1	No	No	Female 35 thru 44	1	0.833217	0.833217	1.32018	1.32018	0.802961	1.06005
1	66	Female	Loudon County	No	No	No	No	Yes	No	Work full-time	Divorced	No	Yes	Very concerned	Very concerned	Extremely concerned	Extremely concerned	Health impacts of COVID-19	Bachelor's degree or higher	$35,000 - $49,999		89 County region	65+	1	No	No	Female 65+	1	1.07058	1.07058	1.32018	1.32018	1.05035	1.38664
1	39	Female	Lawrence County	No	No	No	No	Yes	No	Work part-time	Married	Yes	Yes	Somewhat concerned	Somewhat concerned	Somewhat concerned	Very concerned	Economic impacts of COVID-19	High school graduate or GED	$50,000 - $74,999		89 County region	35-44	1	No	No	Female 35 thru 44	1	0.833217	0.833217	1.32018	1.32018	0.802961	1.06005
1	67	Female	Washington County	No	No	Yes	No	No	No	Retired	Divorced	No	Yes	Somewhat concerned	Not at all concerned	Somewhat concerned	Somewhat concerned	Health impacts of COVID-19	Some college or associate's degree	$25,000 - $34,999		89 County region	65+	1	No	No	Female 65+	0.312422	1.07058	0.334472	1.32018	0.412453	1.05035	0.433218	1.47113	0.919227
1	64	Female	Hardeman County	No	No	No	No	Yes	No	Retired	Separated	Yes	No	Somewhat concerned	Very concerned	Very concerned	Very concerned	Health impacts of COVID-19	Some college or associate's degree	Less than $15,000		89 County region	55-64	1	No	No	Female 55 thru 64	1	0.871068	0.871068	1.32018	1.32018	0.862899	1.13918
1	53	Female	Jefferson County	No	No	No	No	Yes	No	Unemployed	Married	Yes	Yes	Somewhat concerned	Extremely concerned	Somewhat concerned	Extremely concerned	Health impacts of COVID-19	High school graduate or GED	$35,000 - $49,999		89 County region	45-54	1	No	No	Female 45 thru 54	1	0.873441	0.873441	1.32018	1.32018	0.850522	1.12284
1	42	Female	Bledsoe County	Yes	No	Yes	No	Yes	No	Unemployed	Single	Yes	No	Very concerned	Somewhat concerned	Somewhat concerned	Very concerned	Economic impacts of COVID-19	Some college or associate's degree	Less than $15,000		89 County region	35-44	3	No	No	Female 35 thru 44	0.312422	0.833217	0.260315	1.32018	0.412453	0.802961	0.331184	0.733349	0.458229
1	53	Female	Roane County	No	No	No	No	Yes	No	Work full-time	Married	Yes	Yes	Extremely concerned	Extremely concerned	Extremely concerned	Extremely concerned	Health impacts of COVID-19	Some college or associate's degree	$50,000 - $74,999		89 County region	45-54	1	No	No	Female 45 thru 54	1	0.873441	0.873441	1.32018	1.32018	0.850522	1.12284
1	69	Female	Cumberland County	No	No	No	No	Yes	No	Retired	Married	No	Yes	Not very concerned	Not at all concerned	Somewhat concerned	Extremely concerned	Economic impacts of COVID-19	Bachelor's degree or higher	$150,000 or more		89 County region	65+	1	No	No	Female 65+	1	1.07058	1.07058	1.32018	1.32018	1.05035	1.38664
1	63	Male	Fentress County	No	No	No	No	Yes	No	Retired	Married	No	Yes	Not at all concerned	Not very concerned	Not very concerned	Not at all concerned	Health impacts of COVID-19	Bachelor's degree or higher	Less than $15,000		89 County region	55-64	1	No	No	Male 55 thru 65	1	1.08219	1.08219	1.32018	1.32018	1.10949	1.46473
1	31	Male	Williamson County	No	No	No	No	Yes	No	Work full-time	Living with someone	No	No	Not very concerned	Not very concerned	Somewhat concerned	Very concerned	Economic impacts of COVID-19	Some college or associate's degree	$75,000 - $99,999		89 County region	25-34	1	No	No	Male 25 thru 34	1	1.23146	1.23146	1.32018	1.32018	1.31307	1.73349
1	55	Male	Rutherford County	No	No	No	No	Yes	No	Work full-time	Married	Yes	No	Not at all concerned	Not at all concerned	Not at all concerned	Extremely concerned	Economic impacts of COVID-19	Bachelor's degree or higher	$100,000 - $149,999		89 County region	55-64	1	No	No	Male 55 thru 65	1	1.08219	1.08219	1.32018	1.32018	1.10949	1.46473
1	54	Male	Lewis County	No	No	No	No	Yes	No	Work full-time	Married	Yes	Yes	Very concerned	Somewhat concerned	Extremely concerned	Somewhat concerned	Health impacts of COVID-19	High school graduate or GED	$35,000 - $49,999		89 County region	45-54	1	No	No	Male 45 thru 54	1	1.57634	1.57634	1.32018	1.32018	1.43334	1.89227
1	50	Female	Fayette County	No	No	No	No	Yes	No	Retired	Married	Yes	Yes	Not very concerned	Somewhat concerned	Very concerned	Extremely concerned	Economic impacts of COVID-19	Some college or associate's degree	$25,000 - $34,999		89 County region	45-54	1	No	No	Female 45 thru 54	1	0.873441	0.873441	1.32018	1.32018	0.850522	1.12284
1	36	Female	Maury County	No	No	No	No	Yes	No	Stay-at-Home Caregiver	Married	Yes	No	Very concerned	Very concerned	Extremely concerned	Extremely concerned	Health impacts of COVID-19	Some college or associate's degree	$35,000 - $49,999		89 County region	35-44	1	No	No	Female 35 thru 44	1	0.833217	0.833217	1.32018	1.32018	0.802961	1.06005
1	49	Male	Wayne County	No	No	No	No	Yes	No	Work full-time	Married	No	Yes	Somewhat concerned	Somewhat concerned	Somewhat concerned	Very concerned	Economic impacts of COVID-19	Bachelor's degree or higher	$100,000 - $149,999		89 County region	45-54	1	No	No	Male 45 thru 54	1	1.57634	1.57634	1.32018	1.32018	1.43334	1.89227
1	35	Male	Campbell County	No	No	No	No	Yes	No	Work full-time	Single	No	No	Very concerned	Very concerned	Very concerned	Very concerned	Health impacts of COVID-19	Bachelor's degree or higher	$150,000 or more		89 County region	35-44	1	No	No	Male 35 thru 44	1	0.924303	0.924303	1.32018	1.32018	0.954872	1.2606
1	55	Male	Robertson County	No	No	No	No	Yes	No	Work part-time	Single	No	Yes	Not very concerned	Not at all concerned	Very concerned	Very concerned	Health impacts of COVID-19	High school graduate or GED	$25,000 - $34,999		89 County region	55-64	1	No	No	Male 55 thru 65	1	1.08219	1.08219	1.32018	1.32018	1.10949	1.46473
1	46	Female	Hardin County	No	No	No	No	Yes	No	Work full-time	Divorced	No	No	Very concerned	Very concerned	Extremely concerned	Extremely concerned	Health impacts of COVID-19	Some college or associate's degree	$35,000 - $49,999		89 County region	45-54	1	No	No	Female 45 thru 54	1	0.873441	0.873441	1.32018	1.32018	0.850522	1.12284
1	73	Male	Decatur County	No	No	No	No	Yes	No	Retired	Divorced	No	No	Not very concerned	Not very concerned	Not at all concerned	Not very concerned	Economic impacts of COVID-19	Less than high school graduate	Less than $15,000		89 County region	65+	1	No	No	Male 65+	1	1.16223	1.16223	1.32018	1.32018	1.31733	1.73911
1	53	Female	Rutherford County	No	No	No	No	Yes	No	Work full-time	Married	No	Yes	Extremely concerned	Very concerned	Extremely concerned	Extremely concerned	Health impacts of COVID-19	Bachelor's degree or higher	$100,000 - $149,999		89 County region	45-54	1	No	No	Female 45 thru 54	1	0.873441	0.873441	1.32018	1.32018	0.850522	1.12284
1	47	Female	Sumner County	No	No	No	No	Yes	No	Stay-at-Home Caregiver	Married	No	Yes	Extremely concerned	Extremely concerned	Extremely concerned	Extremely concerned	Health impacts of COVID-19	Some college or associate's degree	$25,000 - $34,999		89 County region	45-54	1	No	No	Female 45 thru 54	1	0.873441	0.873441	1.32018	1.32018	0.850522	1.12284
1	40	Male	Williamson County	No	No	No	No	Yes	No	Work full-time	Married	Yes	No	Somewhat concerned	Very concerned	Very concerned	Very concerned	Health impacts of COVID-19	Bachelor's degree or higher	$150,000 or more		89 County region	35-44	1	No	No	Male 35 thru 44	1	0.924303	0.924303	1.32018	1.32018	0.954872	1.2606
1	61	Female	Fentress County	No	No	No	No	Yes	No	Retired	Married	No	Yes	Somewhat concerned	Somewhat concerned	Somewhat concerned	Extremely concerned	Economic impacts of COVID-19	Some college or associate's degree	$15,000 - $24,999		89 County region	55-64	1	No	No	Female 55 thru 64	1	0.871068	0.871068	1.32018	1.32018	0.862899	1.13918
1	56	Male	Washington County	No	No	No	No	Yes	No	Unemployed	Single	No	Yes	Not very concerned	Not very concerned	Not very concerned	Somewhat concerned	Economic impacts of COVID-19	Some college or associate's degree	Less than $15,000		89 County region	55-64	1	No	No	Male 55 thru 65	1	1.08219	1.08219	1.32018	1.32018	1.10949	1.46473
1	29	Female	Sumner County	No	Yes	No	No	Yes	No	Work full-time	Dating	No	No	Somewhat concerned	Somewhat concerned	Somewhat concerned	Very concerned	Health impacts of COVID-19	Bachelor's degree or higher	$35,000 - $49,999		89 County region	25-34	2	No	No	Female 25 thru 34	1	0.809019	0.809019	1.32018	1.32018	0.854477	1.12806
1	35	Female	Anderson County	No	No	No	No	Yes	No	Stay-at-Home Caregiver	Married	No	No	Not at all concerned	Not at all concerned	Not at all concerned	Very concerned	Economic impacts of COVID-19	High school graduate or GED	$35,000 - $49,999		89 County region	35-44	1	No	No	Female 35 thru 44	1	0.833217	0.833217	1.32018	1.32018	0.802961	1.06005
1	66	Female	Sumner County	No	No	No	No	Yes	No	Retired	Divorced	Yes	Yes	Somewhat concerned	Somewhat concerned	Very concerned	Extremely concerned	Health impacts of COVID-19	Some college or associate's degree	$35,000 - $49,999		89 County region	65+	1	No	No	Female 65+	1	1.07058	1.07058	1.32018	1.32018	1.05035	1.38664
1	57	Male	Sumner County	No	No	No	No	Yes	No	Retired	Married	No	Yes	Somewhat concerned	Extremely concerned	Extremely concerned	Extremely concerned	Health impacts of COVID-19	High school graduate or GED	$35,000 - $49,999		89 County region	55-64	1	No	No	Male 55 thru 65	1	1.08219	1.08219	1.32018	1.32018	1.10949	1.46473
1	52	Female	Washington County	No	No	No	No	Yes	No	Stay-at-Home Caregiver	Divorced	No	No	Somewhat concerned	Somewhat concerned	Somewhat concerned	Extremely concerned	Economic impacts of COVID-19	Some college or associate's degree	$50,000 - $74,999		89 County region	45-54	1	No	No	Female 45 thru 54	1	0.873441	0.873441	1.32018	1.32018	0.850522	1.12284
1	54	Female	Greene County	No	No	No	No	No	No	Unemployed	Living with someone	No	No	Not very concerned	Not very concerned	Not very concerned	Very concerned	Economic impacts of COVID-19	High school graduate or GED	Less than $15,000		89 County region	45-54	0	No	No	Female 45 thru 54	1	0.873441	0.873441	1.32018	1.32018	0.850522	1.12284
1	31	Female	Lawrence County	No	No	No	No	Yes	No	Work part-time	Single	Yes	No	Not at all concerned	Not very concerned	Somewhat concerned	Somewhat concerned	Health impacts of COVID-19	Some college or associate's degree	Less than $15,000		89 County region	25-34	1	No	No	Female 25 thru 34	1	0.809019	0.809019	1.32018	1.32018	0.854477	1.12806
1	66	Female	Anderson County	No	No	No	No	Yes	No	Retired	Married	No	Yes	Somewhat concerned	Somewhat concerned	Very concerned	Very concerned	Health impacts of COVID-19	Bachelor's degree or higher	$75,000 - $99,999		89 County region	65+	1	No	No	Female 65+	1	1.07058	1.07058	1.32018	1.32018	1.05035	1.38664
1	54	Female	Blount County	No	No	No	No	Yes	No	Work full-time	Married	Yes	No	Somewhat concerned	Somewhat concerned	Very concerned	Very concerned	Economic impacts of COVID-19	Bachelor's degree or higher	$150,000 or more		89 County region	45-54	1	No	No	Female 45 thru 54	1	0.873441	0.873441	1.32018	1.32018	0.850522	1.12284
1	50	Female	Washington County	No	No	No	No	Yes	No	Work full-time	Married	Yes	Yes	Somewhat concerned	Somewhat concerned	Extremely concerned	Extremely concerned	Economic impacts of COVID-19	High school graduate or GED	$35,000 - $49,999		89 County region	45-54	1	No	No	Female 45 thru 54	1	0.873441	0.873441	1.32018	1.32018	0.850522	1.12284
1	39	Female	Wilson County	No	No	No	No	Yes	No	Looking for work	Single	No	No	Somewhat concerned	Not very concerned	Somewhat concerned	Extremely concerned	Health impacts of COVID-19	Bachelor's degree or higher	$35,000 - $49,999		89 County region	35-44	1	No	No	Female 35 thru 44	1	0.833217	0.833217	1.32018	1.32018	0.802961	1.06005
1	73	Female	Putnam County	No	No	No	No	Yes	No	Retired	Married	No	Yes	Not at all concerned	Not at all concerned	Not at all concerned	Very concerned	Economic impacts of COVID-19	Some college or associate's degree	$35,000 - $49,999		89 County region	65+	1	No	No	Female 65+	1	1.07058	1.07058	1.32018	1.32018	1.05035	1.38664
1	33	Female	Jefferson County	No	No	No	No	Yes	No	Work part-time	Separated	No	No	Not very concerned	Extremely concerned	Extremely concerned	Very concerned	Health impacts of COVID-19	High school graduate or GED	Less than $15,000		89 County region	25-34	1	No	No	Female 25 thru 34	1	0.809019	0.809019	1.32018	1.32018	0.854477	1.12806
1	64	Female	Jefferson County	No	No	No	No	Yes	No	Unemployed	Single	No	Yes	Very concerned	Very concerned	Very concerned	Extremely concerned	Economic impacts of COVID-19	Some college or associate's degree	$15,000 - $24,999		89 County region	55-64	1	No	No	Female 55 thru 64	1	0.871068	0.871068	1.32018	1.32018	0.862899	1.13918
1	49	Male	Bradley County	No	No	No	No	Yes	No	Work full-time	Married	Yes	No	Not very concerned	Not very concerned	Somewhat concerned	Not very concerned	Economic impacts of COVID-19	Some college or associate's degree	$50,000 - $74,999		89 County region	45-54	1	No	No	Male 45 thru 54	1	1.57634	1.57634	1.32018	1.32018	1.43334	1.89227
1	49	Female	Maury County	No	No	No	No	Yes	No	Unemployed	Divorced	No	No	Somewhat concerned	Somewhat concerned	Very concerned	Very concerned	Economic impacts of COVID-19	Bachelor's degree or higher	$75,000 - $99,999		89 County region	45-54	1	No	No	Female 45 thru 54	1	0.873441	0.873441	1.32018	1.32018	0.850522	1.12284
1	29	Female	Washington County	No	No	No	No	Yes	No	Work part-time	Married	No	No	Somewhat concerned	Very concerned	Somewhat concerned	Extremely concerned	Economic impacts of COVID-19	Some college or associate's degree	$15,000 - $24,999		89 County region	25-34	1	No	No	Female 25 thru 34	1	0.809019	0.809019	1.32018	1.32018	0.854477	1.12806
1	62	Female	Cocke County	No	No	No	No	Yes	No	Retired	Married	No	No	Not very concerned	Somewhat concerned	Extremely concerned	Extremely concerned	Economic impacts of COVID-19	High school graduate or GED	$25,000 - $34,999		89 County region	55-64	1	No	No	Female 55 thru 64	1	0.871068	0.871068	1.32018	1.32018	0.862899	1.13918
1	52	Female	Roane County	No	No	No	No	Yes	No	Work full-time	Married	No	Yes	Not very concerned	Not very concerned	Somewhat concerned	Extremely concerned	Economic impacts of COVID-19	Some college or associate's degree	$25,000 - $34,999		89 County region	45-54	1	No	No	Female 45 thru 54	1	0.873441	0.873441	1.32018	1.32018	0.850522	1.12284
1	59	Female	Unicoi County	No	No	No	No	Yes	No	Work full-time	Married	No	Yes	Somewhat concerned	Somewhat concerned	Very concerned	Somewhat concerned	Health impacts of COVID-19	Bachelor's degree or higher	$75,000 - $99,999		89 County region	55-64	1	No	No	Female 55 thru 64	1	0.871068	0.871068	1.32018	1.32018	0.862899	1.13918
1	71	Female	Giles County	No	No	No	No	Yes	No	Retired	Single	No	No	Extremely concerned	Extremely concerned	Extremely concerned	Extremely concerned	Health impacts of COVID-19	High school graduate or GED	$25,000 - $34,999		89 County region	65+	1	No	No	Female 65+	1	1.07058	1.07058	1.32018	1.32018	1.05035	1.38664
1	56	Female	Bradley County	No	No	No	Yes	No	No	Retired	Dating	No	No	Somewhat concerned	Somewhat concerned	Extremely concerned	Very concerned	Economic impacts of COVID-19	High school graduate or GED	Less than $15,000		89 County region	55-64	1	Yes	No	Female 55 thru 64	1	0.871068	0.871068	1.32018	1.32018	0.862899	1.13918
1	23	Female	Sequatchie County	No	No	No	No	Yes	No	Stay-at-Home Caregiver	Married	Yes	No	Very concerned	Somewhat concerned	Extremely concerned	Extremely concerned	Economic impacts of COVID-19	Some college or associate's degree	$25,000 - $34,999		89 County region	18-24	1	No	No	Female 18 thru 24	1	0.736171	0.736171	1.32018	1.32018	0.698121	0.921645
1	69	Female	Grainger County	No	No	No	No	Yes	No	Retired	Living with someone	No	Yes	Very concerned	Very concerned	Very concerned	Extremely concerned	Health impacts of COVID-19	Some college or associate's degree	$25,000 - $34,999		89 County region	65+	1	No	No	Female 65+	1	1.07058	1.07058	1.32018	1.32018	1.05035	1.38664
1	59	Female	Maury County	No	No	No	No	Yes	No	Looking for work	Married	No	Yes	Not very concerned	Somewhat concerned	Somewhat concerned	Somewhat concerned	Economic impacts of COVID-19	Some college or associate's degree	$35,000 - $49,999		89 County region	55-64	1	No	No	Female 55 thru 64	1	0.871068	0.871068	1.32018	1.32018	0.862899	1.13918
1	18	Female	Hamblen County	Yes	No	No	No	No	No	Work part-time	Single	No	No	Very concerned	Extremely concerned	Extremely concerned	Extremely concerned	Health impacts of COVID-19	High school graduate or GED	$15,000 - $24,999		89 County region	18-24	1	Yes	No	Female 18 thru 24	1	0.736171	0.736171	1.32018	1.32018	0.698121	0.921645
1	28	Female	Jefferson County	No	No	No	No	Yes	No	Unemployed	Living with someone	No	Yes	Very concerned	Somewhat concerned	Very concerned	Very concerned	Health impacts of COVID-19	Less than high school graduate	$25,000 - $34,999		89 County region	25-34	1	No	No	Female 25 thru 34	1	0.809019	0.809019	1.32018	1.32018	0.854477	1.12806
1	53	Female	Sumner County	No	No	No	No	Yes	No	Work full-time	Divorced	No	Yes	Somewhat concerned	Very concerned	Somewhat concerned	Very concerned	Economic impacts of COVID-19	High school graduate or GED	$25,000 - $34,999		89 County region	45-54	1	No	No	Female 45 thru 54	1	0.873441	0.873441	1.32018	1.32018	0.850522	1.12284
1	47	Female	Greene County	No	No	No	No	Yes	No	Work full-time	Married	Yes	No	Very concerned	Very concerned	Extremely concerned	Extremely concerned	Health impacts of COVID-19	Bachelor's degree or higher	$25,000 - $34,999		89 County region	45-54	1	No	No	Female 45 thru 54	1	0.873441	0.873441	1.32018	1.32018	0.850522	1.12284
1	61	Male	McMinn County	No	No	No	No	Yes	No	Retired	Divorced	No	No	Not at all concerned	Not at all concerned	Not at all concerned	Not at all concerned	Economic impacts of COVID-19	Some college or associate's degree	Less than $15,000		89 County region	55-64	1	No	No	Male 55 thru 65	1	1.08219	1.08219	1.32018	1.32018	1.10949	1.46473
1	56	Female	Wilson County	No	No	No	No	Yes	No	Unemployed	Living with someone	No	Yes	Not very concerned	Somewhat concerned	Somewhat concerned	Very concerned	Economic impacts of COVID-19	High school graduate or GED	$150,000 or more		89 County region	55-64	1	No	No	Female 55 thru 64	1	0.871068	0.871068	1.32018	1.32018	0.862899	1.13918
1	38	Female	Bedford County	No	No	No	No	Yes	No	Stay-at-Home Caregiver	Married	Yes	Yes	Not very concerned	Not very concerned	Not very concerned	Not very concerned	Health impacts of COVID-19	High school graduate or GED	$25,000 - $34,999		89 County region	35-44	1	No	No	Female 35 thru 44	1	0.833217	0.833217	1.32018	1.32018	0.802961	1.06005
1	37	Female	Monroe County	No	No	No	No	Yes	No	Work full-time	Married	Yes	No	Somewhat concerned	Somewhat concerned	Somewhat concerned	Very concerned	Economic impacts of COVID-19	Bachelor's degree or higher	$100,000 - $149,999		89 County region	35-44	1	No	No	Female 35 thru 44	1	0.833217	0.833217	1.32018	1.32018	0.802961	1.06005
1	56	Female	Macon County	No	No	No	No	Yes	No	Stay-at-Home Caregiver	Married	No	Yes	Somewhat concerned	Somewhat concerned	Somewhat concerned	Very concerned	Economic impacts of COVID-19	High school graduate or GED	$35,000 - $49,999		89 County region	55-64	1	No	No	Female 55 thru 64	1	0.871068	0.871068	1.32018	1.32018	0.862899	1.13918
1	59	Female	Washington County	No	No	No	No	Yes	No	Work full-time	Divorced	Yes	No	Not very concerned	Not very concerned	Somewhat concerned	Very concerned	Economic impacts of COVID-19	Some college or associate's degree	$75,000 - $99,999		89 County region	55-64	1	No	No	Female 55 thru 64	1	0.871068	0.871068	1.32018	1.32018	0.862899	1.13918
1	56	Female	Hardeman County	No	No	Yes	No	No	No	Work full-time	Single	No	Yes	Extremely concerned	Extremely concerned	Extremely concerned	Extremely concerned	Economic impacts of COVID-19	High school graduate or GED	$25,000 - $34,999		89 County region	55-64	1	No	No	Female 55 thru 64	0.312422	0.871068	0.272141	1.32018	0.412453	0.862899	0.355906	1.04624	0.653738
1	45	Female	Henry County	No	No	No	No	Yes	No	Stay-at-Home Caregiver	Married	No	Yes	Somewhat concerned	Somewhat concerned	Very concerned	Very concerned	Economic impacts of COVID-19	Some college or associate's degree	$15,000 - $24,999		89 County region	45-54	1	No	No	Female 45 thru 54	1	0.873441	0.873441	1.32018	1.32018	0.850522	1.12284
1	63	Female	Sumner County	No	No	No	No	Yes	No	Looking for work	Single	No	No	Somewhat concerned	Somewhat concerned	Somewhat concerned	Extremely concerned	Economic impacts of COVID-19	High school graduate or GED	$15,000 - $24,999		89 County region	55-64	1	No	No	Female 55 thru 64	1	0.871068	0.871068	1.32018	1.32018	0.862899	1.13918
1	63	Female	Sumner County	No	No	No	No	Yes	No	Retired	Divorced	Yes	No	Extremely concerned	Extremely concerned	Extremely concerned	Extremely concerned	Health impacts of COVID-19	High school graduate or GED	Less than $15,000		89 County region	55-64	1	No	No	Female 55 thru 64	1	0.871068	0.871068	1.32018	1.32018	0.862899	1.13918
1	66	Male	Carroll County	No	No	No	No	Yes	No	Retired	Married	No	Yes	Extremely concerned	Somewhat concerned	Not very concerned	Extremely concerned	Health impacts of COVID-19	High school graduate or GED	$35,000 - $49,999		89 County region	65+	1	No	No	Male 65+	1	1.16223	1.16223	1.32018	1.32018	1.31733	1.73911
1	30	Male	Maury County	No	No	No	No	Yes	No	Work full-time	Married	Yes	No	Not at all concerned	Not at all concerned	Somewhat concerned	Somewhat concerned	Economic impacts of COVID-19	Bachelor's degree or higher	$50,000 - $74,999		89 County region	25-34	1	No	No	Male 25 thru 34	1	1.23146	1.23146	1.32018	1.32018	1.31307	1.73349
1	59	Female	Franklin County	No	No	No	No	Yes	No	Work full-time	Married	No	Yes	Extremely concerned	Extremely concerned	Extremely concerned	Very concerned	Health impacts of COVID-19	High school graduate or GED	$25,000 - $34,999		89 County region	55-64	1	No	No	Female 55 thru 64	1	0.871068	0.871068	1.32018	1.32018	0.862899	1.13918
1	76	Male	Marshall County	No	No	No	No	Yes	No	Retired	Married	Yes	Yes	Not very concerned	Not very concerned	Somewhat concerned	Very concerned	Health impacts of COVID-19	High school graduate or GED	$50,000 - $74,999		89 County region	65+	1	No	No	Male 65+	1	1.16223	1.16223	1.32018	1.32018	1.31733	1.73911
1	71	Female	White County	No	No	No	No	Yes	No	Retired	Single	No	Yes	Somewhat concerned	Somewhat concerned	Not at all concerned	Very concerned	Health impacts of COVID-19	Bachelor's degree or higher	$35,000 - $49,999		89 County region	65+	1	No	No	Female 65+	1	1.07058	1.07058	1.32018	1.32018	1.05035	1.38664
1	20	Female	Dyer County	No	No	No	Yes	No	No	Student	Single	No	No	Not at all concerned	Somewhat concerned	Somewhat concerned	Somewhat concerned	Economic impacts of COVID-19	High school graduate or GED	Less than $15,000		89 County region	18-24	1	Yes	No	Female 18 thru 24	1	0.736171	0.736171	1.32018	1.32018	0.698121	0.921645
1	32	Male	Loudon County	No	No	No	No	Yes	No	Work full-time	Married	No	No	Somewhat concerned	Somewhat concerned	Very concerned	Extremely concerned	Health impacts of COVID-19	High school graduate or GED	$15,000 - $24,999		89 County region	25-34	1	No	No	Male 25 thru 34	1	1.23146	1.23146	1.32018	1.32018	1.31307	1.73349
1	57	Female	Polk County	No	No	No	No	Yes	No	Work part-time	Divorced	Yes	Yes	Extremely concerned	Extremely concerned	Extremely concerned	Extremely concerned	Health impacts of COVID-19	Bachelor's degree or higher	$35,000 - $49,999		89 County region	55-64	1	No	No	Female 55 thru 64	1	0.871068	0.871068	1.32018	1.32018	0.862899	1.13918
1	58	Female	Cumberland County	No	No	No	No	Yes	No	Work full-time	Divorced	Yes	Yes	Not very concerned	Somewhat concerned	Not very concerned	Somewhat concerned	Economic impacts of COVID-19	Bachelor's degree or higher	$25,000 - $34,999		89 County region	55-64	1	No	No	Female 55 thru 64	1	0.871068	0.871068	1.32018	1.32018	0.862899	1.13918
1	72	Male	Henry County	No	No	No	No	Yes	No	Retired	Married	No	Yes	Not very concerned	Not very concerned	Not at all concerned	Somewhat concerned	Health impacts of COVID-19	Some college or associate's degree	$50,000 - $74,999		89 County region	65+	1	No	No	Male 65+	1	1.16223	1.16223	1.32018	1.32018	1.31733	1.73911
1	52	Male	Lawrence County	No	No	No	No	Yes	No	Retired	Married	No	Yes	Not very concerned	Not very concerned	Somewhat concerned	Somewhat concerned	Economic impacts of COVID-19	High school graduate or GED	$50,000 - $74,999		89 County region	45-54	1	No	No	Male 45 thru 54	1	1.57634	1.57634	1.32018	1.32018	1.43334	1.89227
1	47	Female	Franklin County	No	No	No	No	Yes	No	Work full-time	Married	Yes	No	Extremely concerned	Extremely concerned	Extremely concerned	Extremely concerned	Health impacts of COVID-19	Some college or associate's degree	$35,000 - $49,999		89 County region	45-54	1	No	No	Female 45 thru 54	1	0.873441	0.873441	1.32018	1.32018	0.850522	1.12284
1	36	Female	Blount County	No	No	No	No	Yes	No	Work full-time	Married	Yes	No	Not very concerned	Somewhat concerned	Somewhat concerned	Somewhat concerned	Economic impacts of COVID-19	Some college or associate's degree	$100,000 - $149,999		89 County region	35-44	1	No	No	Female 35 thru 44	1	0.833217	0.833217	1.32018	1.32018	0.802961	1.06005
1	66	Female	Robertson County	Yes	No	Yes	No	No	No	Work full-time	Married	No	Yes	Very concerned	Somewhat concerned	Very concerned	Extremely concerned	Health impacts of COVID-19	Bachelor's degree or higher	$75,000 - $99,999		89 County region	65+	2	No	No	Female 65+	0.312422	1.07058	0.334472	1.32018	0.412453	1.05035	0.433218	1.47113	0.919227
1	28	Male	Rutherford County	No	No	No	No	Yes	No	Work full-time	Single	No	Yes	Not at all concerned	Not at all concerned	Not at all concerned	Very concerned	Economic impacts of COVID-19	High school graduate or GED	$50,000 - $74,999		89 County region	25-34	1	No	No	Male 25 thru 34	1	1.23146	1.23146	1.32018	1.32018	1.31307	1.73349
1	46	Female	Sumner County	No	No	No	No	Yes	No	Stay-at-Home Caregiver	Married	Yes	No	Not at all concerned	Somewhat concerned	Somewhat concerned	Somewhat concerned	Economic impacts of COVID-19	Bachelor's degree or higher	$100,000 - $149,999		89 County region	45-54	1	No	No	Female 45 thru 54	1	0.873441	0.873441	1.32018	1.32018	0.850522	1.12284
1	68	Female	Cocke County	No	No	No	No	Yes	No	Retired	Married	No	No	Not at all concerned	Not at all concerned	Not at all concerned	Somewhat concerned	Economic impacts of COVID-19	Bachelor's degree or higher	$25,000 - $34,999		89 County region	65+	1	No	No	Female 65+	1	1.07058	1.07058	1.32018	1.32018	1.05035	1.38664
1	45	Female	Coffee County	No	No	No	No	Yes	No	Unemployed	Married	Yes	No	Not very concerned	Not very concerned	Somewhat concerned	Somewhat concerned	Economic impacts of COVID-19	Bachelor's degree or higher	$50,000 - $74,999		89 County region	45-54	1	No	No	Female 45 thru 54	1	0.873441	0.873441	1.32018	1.32018	0.850522	1.12284
1	58	Male	Coffee County	No	No	No	No	Yes	No	Work full-time	Married	Yes	Yes	Extremely concerned	Very concerned	Very concerned	Very concerned	Economic impacts of COVID-19	Bachelor's degree or higher	$25,000 - $34,999		89 County region	55-64	1	No	No	Male 55 thru 65	1	1.08219	1.08219	1.32018	1.32018	1.10949	1.46473
1	60	Female	Sumner County	No	No	No	No	Yes	No	Retired	Single	No	Yes	Very concerned	Very concerned	Very concerned	Extremely concerned	Health impacts of COVID-19	Some college or associate's degree	$50,000 - $74,999		89 County region	55-64	1	No	No	Female 55 thru 64	1	0.871068	0.871068	1.32018	1.32018	0.862899	1.13918
1	55	Female	Franklin County	No	No	No	No	Yes	No	Work full-time	Married	No	Yes	Very concerned	Extremely concerned	Extremely concerned	Extremely concerned	Health impacts of COVID-19	Some college or associate's degree	$35,000 - $49,999		89 County region	55-64	1	No	No	Female 55 thru 64	1	0.871068	0.871068	1.32018	1.32018	0.862899	1.13918
1	59	Female	Montgomery County	No	No	No	No	Yes	No	Retired	Divorced	No	Yes	Somewhat concerned	Somewhat concerned	Somewhat concerned	Extremely concerned	Health impacts of COVID-19	High school graduate or GED	$15,000 - $24,999		89 County region	55-64	1	No	No	Female 55 thru 64	1	0.871068	0.871068	1.32018	1.32018	0.862899	1.13918
1	45	Female	Hawkins County	Yes	No	No	No	Yes	No	Stay-at-Home Caregiver	Married	Yes	No	Not very concerned	Not very concerned	Not very concerned	Somewhat concerned	Health impacts of COVID-19	High school graduate or GED	$25,000 - $34,999		89 County region	45-54	2	No	No	Female 45 thru 54	1	0.873441	0.873441	1.32018	1.32018	0.850522	1.12284
1	28	Female	Montgomery County	No	No	No	No	Yes	No	Unemployed	Divorced	Yes	No	Somewhat concerned	Somewhat concerned	Extremely concerned	Very concerned	Economic impacts of COVID-19	Bachelor's degree or higher	$50,000 - $74,999		89 County region	25-34	1	No	No	Female 25 thru 34	1	0.809019	0.809019	1.32018	1.32018	0.854477	1.12806
1	37	Female	Dickson County	No	No	No	No	Yes	No	Work full-time	Married	Yes	No	Not very concerned	Not very concerned	Not very concerned	Very concerned	Economic impacts of COVID-19	Bachelor's degree or higher	$100,000 - $149,999		89 County region	35-44	1	No	No	Female 35 thru 44	1	0.833217	0.833217	1.32018	1.32018	0.802961	1.06005
1	45	Female	Putnam County	No	No	No	No	Yes	No	Work full-time	Married	No	No	Not at all concerned	Not very concerned	Not very concerned	Somewhat concerned	Economic impacts of COVID-19	Bachelor's degree or higher	$150,000 or more		89 County region	45-54	1	No	No	Female 45 thru 54	1	0.873441	0.873441	1.32018	1.32018	0.850522	1.12284
1	66	Male	Washington County	No	No	No	No	Yes	No	Retired	Married	No	Yes	Somewhat concerned	Not at all concerned	Not very concerned	Very concerned	Economic impacts of COVID-19	Bachelor's degree or higher	$35,000 - $49,999		89 County region	65+	1	No	No	Male 65+	1	1.16223	1.16223	1.32018	1.32018	1.31733	1.73911
1	50	Female	Rutherford County	No	No	No	No	Yes	No	Work full-time	Married	Yes	Yes	Not very concerned	Somewhat concerned	Somewhat concerned	Extremely concerned	Economic impacts of COVID-19	Bachelor's degree or higher	$50,000 - $74,999		89 County region	45-54	1	No	No	Female 45 thru 54	1	0.873441	0.873441	1.32018	1.32018	0.850522	1.12284
1	29	Male	Sumner County	No	No	Yes	No	No	No	Work full-time	Married	Yes	No	Very concerned	Extremely concerned	Extremely concerned	Extremely concerned	Health impacts of COVID-19	High school graduate or GED	Less than $15,000		89 County region	25-34	1	No	No	Male 25 thru 34	0.312422	1.23146	0.384736	1.32018	0.412453	1.31307	0.541579	1.15163	0.719589
1	40	Female	Greene County	No	No	No	No	Yes	No	Work full-time	Single	Yes	No	Not at all concerned	Not at all concerned	Not at all concerned	Not very concerned	Economic impacts of COVID-19	Some college or associate's degree	$25,000 - $34,999		89 County region	35-44	1	No	No	Female 35 thru 44	1	0.833217	0.833217	1.32018	1.32018	0.802961	1.06005
1	58	Male	Dyer County	No	No	No	No	Yes	No	Work full-time	Divorced	No	Yes	Somewhat concerned	Not very concerned	Not very concerned	Very concerned	Economic impacts of COVID-19	Bachelor's degree or higher	$50,000 - $74,999		89 County region	55-64	1	No	No	Male 55 thru 65	1	1.08219	1.08219	1.32018	1.32018	1.10949	1.46473
1	42	Male	Hamblen County	No	No	No	No	Yes	No	Work part-time	Married	No	No	Extremely concerned	Very concerned	Extremely concerned	Extremely concerned	Health impacts of COVID-19	Bachelor's degree or higher	Less than $15,000		89 County region	35-44	1	No	No	Male 35 thru 44	1	0.924303	0.924303	1.32018	1.32018	0.954872	1.2606
1	32	Male	Marshall County	No	No	No	No	Yes	No	Work full-time	Married	Yes	No	Somewhat concerned	Not very concerned	Not very concerned	Very concerned	Health impacts of COVID-19	High school graduate or GED	$150,000 or more		89 County region	25-34	1	No	No	Male 25 thru 34	1	1.23146	1.23146	1.32018	1.32018	1.31307	1.73349
1	60	Male	Sumner County	No	No	No	No	Yes	No	Work part-time	Single	No	No	Extremely concerned	Extremely concerned	Extremely concerned	Extremely concerned	Health impacts of COVID-19	Some college or associate's degree	$75,000 - $99,999		89 County region	55-64	1	No	No	Male 55 thru 65	1	1.08219	1.08219	1.32018	1.32018	1.10949	1.46473
1	73	Female	Montgomery County	No	No	No	No	Yes	No	Retired	Married	No	Yes	Not very concerned	Not very concerned	Not very concerned	Very concerned	Economic impacts of COVID-19	Some college or associate's degree	$50,000 - $74,999		89 County region	65+	1	No	No	Female 65+	1	1.07058	1.07058	1.32018	1.32018	1.05035	1.38664
1	67	Female	Bedford County	No	No	No	No	Yes	No	Retired	Divorced	No	Yes	Very concerned	Very concerned	Very concerned	Very concerned	Health impacts of COVID-19	Some college or associate's degree	$25,000 - $34,999		89 County region	65+	1	No	No	Female 65+	1	1.07058	1.07058	1.32018	1.32018	1.05035	1.38664
1	32	Female	Sumner County	No	No	No	No	Yes	No	Unemployed	Single	No	Yes	Somewhat concerned	Somewhat concerned	Somewhat concerned	Very concerned	Health impacts of COVID-19	High school graduate or GED	$35,000 - $49,999		89 County region	25-34	1	No	No	Female 25 thru 34	1	0.809019	0.809019	1.32018	1.32018	0.854477	1.12806
1	74	Female	Warren County	No	No	No	No	Yes	No	Retired	Single	No	Yes	Very concerned	Very concerned	Very concerned	Extremely concerned	Health impacts of COVID-19	Some college or associate's degree	Less than $15,000		89 County region	65+	1	No	No	Female 65+	1	1.07058	1.07058	1.32018	1.32018	1.05035	1.38664
1	49	Other	Scott County	No	No	No	No	Yes	No	Unemployed	Single	No	No	Not at all concerned	Not very concerned	Not very concerned	Not very concerned	Economic impacts of COVID-19	High school graduate or GED	Less than $15,000		89 County region	45-54	1	No	No		1			1.32018	1.32018
1	22	Female	Bedford County	No	No	No	No	Yes	No	Student	Single	No	Yes	Very concerned	Somewhat concerned		Very concerned	Economic impacts of COVID-19	Some college or associate's degree	$50,000 - $74,999		89 County region	18-24	1	No	No	Female 18 thru 24	1	0.736171	0.736171	1.32018	1.32018	0.698121	0.921645
1	45	Female	McMinn County	No	No	No	No	Yes	No	Work part-time	Living with someone	No	No	Very concerned	Extremely concerned	Extremely concerned	Extremely concerned	Economic impacts of COVID-19	High school graduate or GED	$25,000 - $34,999		89 County region	45-54	1	No	No	Female 45 thru 54	1	0.873441	0.873441	1.32018	1.32018	0.850522	1.12284
1	33	Female	Monroe County	No	Yes	No	No	No	No	Unemployed	Separated	Yes	Yes	Somewhat concerned	Extremely concerned	Somewhat concerned	Very concerned	Economic impacts of COVID-19	Some college or associate's degree	$15,000 - $24,999		89 County region	25-34	1	Yes	No	Female 25 thru 34	1	0.809019	0.809019	1.32018	1.32018	0.854477	1.12806
1	30	Female	Greene County	No	No	No	No	Yes	No	Stay-at-Home Caregiver	Living with someone	Yes	No	Somewhat concerned	Somewhat concerned	Somewhat concerned	Very concerned	Health impacts of COVID-19	High school graduate or GED	$35,000 - $49,999		89 County region	25-34	1	No	No	Female 25 thru 34	1	0.809019	0.809019	1.32018	1.32018	0.854477	1.12806
1	46	Female	Jefferson County	No	No	No	No	Yes	No	Stay-at-Home Caregiver	Married	Yes	Yes	Somewhat concerned	Very concerned	Very concerned	Extremely concerned	Economic impacts of COVID-19	Less than high school graduate	$50,000 - $74,999		89 County region	45-54	1	No	No	Female 45 thru 54	1	0.873441	0.873441	1.32018	1.32018	0.850522	1.12284
1	39	Female	Houston County	No	No	No	No	Yes	No	Work full-time	Married	Yes	No	Somewhat concerned	Somewhat concerned	Very concerned	Somewhat concerned	Health impacts of COVID-19	Some college or associate's degree	$50,000 - $74,999		89 County region	35-44	1	No	No	Female 35 thru 44	1	0.833217	0.833217	1.32018	1.32018	0.802961	1.06005
1	49	Female	Campbell County	No	No	No	No	Yes	No	Stay-at-Home Caregiver	Married	No	Yes	Very concerned	Extremely concerned	Extremely concerned	Extremely concerned	Economic impacts of COVID-19	High school graduate or GED	$50,000 - $74,999		89 County region	45-54	1	No	No	Female 45 thru 54	1	0.873441	0.873441	1.32018	1.32018	0.850522	1.12284
1	32	Male	Stewart County	No	No	No	No	Yes	No	Unemployed	Living with someone	Yes	Yes	Not very concerned	Somewhat concerned	Somewhat concerned	Somewhat concerned	Health impacts of COVID-19	High school graduate or GED	$15,000 - $24,999		89 County region	25-34	1	No	No	Male 25 thru 34	1	1.23146	1.23146	1.32018	1.32018	1.31307	1.73349
1	34	Female	Sevier County	No	No	No	No	Yes	No	Student	Divorced	Yes	No	Very concerned	Very concerned	Very concerned	Extremely concerned	Health impacts of COVID-19	Some college or associate's degree	Less than $15,000		89 County region	25-34	1	No	No	Female 25 thru 34	1	0.809019	0.809019	1.32018	1.32018	0.854477	1.12806
1	29	Female	Rhea County	No	No	No	No	Yes	No	Unemployed	Living with someone	No	Yes	Extremely concerned	Extremely concerned	Extremely concerned	Extremely concerned	Economic impacts of COVID-19	Less than high school graduate	Less than $15,000		89 County region	25-34	1	No	No	Female 25 thru 34	1	0.809019	0.809019	1.32018	1.32018	0.854477	1.12806
1	40	Female	Coffee County	Yes	No	No	No	Yes	No	Unemployed	Divorced	Yes	Yes	Not at all concerned	Not at all concerned	Not very concerned	Not very concerned	Economic impacts of COVID-19	Some college or associate's degree	$15,000 - $24,999		89 County region	35-44	2	No	No	Female 35 thru 44	1	0.833217	0.833217	1.32018	1.32018	0.802961	1.06005
1	27	Female	Marshall County	No	No	No	No	Yes	No	Stay-at-Home Caregiver	Living with someone	Yes	No	Somewhat concerned	Not very concerned	Somewhat concerned	Somewhat concerned	Economic impacts of COVID-19	Some college or associate's degree	$50,000 - $74,999		89 County region	25-34	1	No	No	Female 25 thru 34	1	0.809019	0.809019	1.32018	1.32018	0.854477	1.12806
1	42	Female	Bedford County	No	No	No	No	Yes	No	Unemployed	Married	No	No	Not very concerned	Somewhat concerned	Somewhat concerned	Somewhat concerned	Economic impacts of COVID-19	Some college or associate's degree	$35,000 - $49,999		89 County region	35-44	1	No	No	Female 35 thru 44	1	0.833217	0.833217	1.32018	1.32018	0.802961	1.06005
1	20	Female	Claiborne County	No	No	No	No	No	Yes	Student	Single	No	No	Not very concerned	Somewhat concerned	Very concerned	Extremely concerned	Health impacts of COVID-19	Some college or associate's degree	$35,000 - $49,999		89 County region	18-24	1	Yes	No	Female 18 thru 24	1	0.736171	0.736171	1.32018	1.32018	0.698121	0.921645
1	31	Female	Trousdale County	No	No	No	No	Yes	No	Stay-at-Home Caregiver	Married	Yes	No	Not very concerned	Not at all concerned	Not at all concerned	Extremely concerned	Economic impacts of COVID-19	Bachelor's degree or higher	$50,000 - $74,999		89 County region	25-34	1	No	No	Female 25 thru 34	1	0.809019	0.809019	1.32018	1.32018	0.854477	1.12806
1	53	Male	Haywood County	No	No	No	No	Yes	No	Unemployed	Divorced	No	Yes	Not very concerned	Not very concerned	Not very concerned	Not at all concerned	Economic impacts of COVID-19	High school graduate or GED	$15,000 - $24,999		89 County region	45-54	1	No	No	Male 45 thru 54	1	1.57634	1.57634	1.32018	1.32018	1.43334	1.89227
1	23	Male	Montgomery County	No	Yes	No	No	No	No	Work full-time	Single	No	No	Somewhat concerned	Very concerned	Very concerned	Extremely concerned	Economic impacts of COVID-19	Some college or associate's degree	$50,000 - $74,999		89 County region	18-24	1	Yes	No	Male 18 thru 24	1	1.24847	1.24847	1.32018	1.32018	1.24389	1.64216
1	26	Male	Hawkins County	No	No	No	No	Yes	No	Work full-time	Married	No	No	Somewhat concerned	Somewhat concerned	Very concerned	Not very concerned	Health impacts of COVID-19	Some college or associate's degree	$25,000 - $34,999		89 County region	25-34	1	No	No	Male 25 thru 34	1	1.23146	1.23146	1.32018	1.32018	1.31307	1.73349
1	39	Male	Fentress County	No	No	No	No	Yes	No	Stay-at-Home Caregiver	Married	Yes	No	Not very concerned	Not very concerned	Not very concerned	Not very concerned	Economic impacts of COVID-19	Bachelor's degree or higher	$35,000 - $49,999		89 County region	35-44	1	No	No	Male 35 thru 44	1	0.924303	0.924303	1.32018	1.32018	0.954872	1.2606
1	51	Male	Maury County	No	No	Yes	No	No	No	Unemployed	Married	No	No	Somewhat concerned	Not at all concerned	Somewhat concerned	Somewhat concerned	Economic impacts of COVID-19	Some college or associate's degree	$35,000 - $49,999		89 County region	45-54	1	No	No	Male 45 thru 54	0.312422	1.57634	0.492485	1.32018	0.412453	1.43334	0.591186	1.51878	0.948998
1	29	Male	Blount County	No	No	Yes	No	No	No	Unemployed	Single	Yes	Yes	Extremely concerned	Extremely concerned	Extremely concerned	Very concerned	Health impacts of COVID-19	Less than high school graduate	Less than $15,000		89 County region	25-34	1	No	No	Male 25 thru 34	0.312422	1.23146	0.384736	1.32018	0.412453	1.31307	0.541579	1.15163	0.719589
1	27	Male	Hamblen County	No	No	No	No	Yes	No	Work full-time	Married	Yes	No	Somewhat concerned	Not very concerned	Somewhat concerned	Somewhat concerned	Health impacts of COVID-19	Some college or associate's degree	$35,000 - $49,999		89 County region	25-34	1	No	No	Male 25 thru 34	1	1.23146	1.23146	1.32018	1.32018	1.31307	1.73349
1	19	Male	Bledsoe County	No	No	Yes	No	No	No	Looking for work	Separated	No	No	Somewhat concerned	Very concerned	Very concerned	Very concerned	Economic impacts of COVID-19	Some college or associate's degree	Less than $15,000		89 County region	18-24	1	No	No	Male 18 thru 24	0.312422	1.24847	0.390049	1.32018	0.412453	1.24389	0.513046	0.8773	0.548176
1	18	Female	Benton County	No	Yes	No	No	No	No	Work part-time	Living with someone	No	No	Extremely concerned	Very concerned	Very concerned	Somewhat concerned	Economic impacts of COVID-19	Bachelor's degree or higher	$25,000 - $34,999		89 County region	18-24	1	Yes	No	Female 18 thru 24	1	0.736171	0.736171	1.32018	1.32018	0.698121	0.921645
1	53	Male	Tipton County	No	No	No	No	Yes	No	Work part-time	Married	No	Yes	Not very concerned	Not at all concerned	Not very concerned	Somewhat concerned	Economic impacts of COVID-19	Bachelor's degree or higher	$100,000 - $149,999		89 County region	45-54	1	No	No	Male 45 thru 54	1	1.57634	1.57634	1.32018	1.32018	1.43334	1.89227
1	59	Male	Jackson County	No	No	No	No	Yes	No	Work full-time	Single	No	Yes	Very concerned	Very concerned	Somewhat concerned	Very concerned	Health impacts of COVID-19	Less than high school graduate	$75,000 - $99,999		89 County region	55-64	1	No	No	Male 55 thru 65	1	1.08219	1.08219	1.32018	1.32018	1.10949	1.46473
1	18	Female	Carter County	No	No	No	No	Yes	No	Work part-time	Married	No	Yes	Not very concerned	Somewhat concerned	Very concerned	Very concerned	Health impacts of COVID-19	High school graduate or GED	Less than $15,000		89 County region	18-24	1	No	No	Female 18 thru 24	1	0.736171	0.736171	1.32018	1.32018	0.698121	0.921645
1	18	Male	Monroe County	No	No	Yes	No	No	No	Student	Single	No	Yes	Very concerned	Very concerned	Somewhat concerned	Somewhat concerned	Health impacts of COVID-19	High school graduate or GED	$15,000 - $24,999		89 County region	18-24	1	No	No	Male 18 thru 24	0.312422	1.24847	0.390049	1.32018	0.412453	1.24389	0.513046	0.8773	0.548176
1	25	Male	Montgomery County	No	No	Yes	No	No	No	Work full-time	Single	Yes	No	Extremely concerned	Very concerned	Very concerned	Very concerned	Health impacts of COVID-19	High school graduate or GED	Less than $15,000		89 County region	25-34	1	No	Yes, AA oversample	Male 25 thru 34	0.312422	1.23146	0.384736	1.32018	0.412453	1.31307	0.541579	1.15163	0.719589
1	30	Male	Jefferson County	No	No	Yes	No	No	No	Work full-time	Married	Yes	No	Somewhat concerned	Very concerned	Very concerned		Economic impacts of COVID-19	High school graduate or GED	$15,000 - $24,999		89 County region	25-34	1	No	Yes, AA oversample	Male 25 thru 34	0.312422	1.23146	0.384736	1.32018	0.412453	1.31307	0.541579	1.15163	0.719589
1	18	Female	Anderson County	No	No	Yes	No	No	No	Work part-time	Divorced	No	Yes	Very concerned	Very concerned	Very concerned	Not very concerned	Health impacts of COVID-19	Less than high school graduate	$25,000 - $34,999		89 County region	18-24	1	No	Yes, AA oversample	Female 18 thru 24	0.312422	0.736171	0.229996	1.32018	0.412453	0.698121	0.287942	0.394655	0.246598
1	23	Male	Trousdale County	Yes	No	Yes	No	No	No	Work full-time	Dating	No	No	Extremely concerned	Extremely concerned	Extremely concerned	Extremely concerned	Economic impacts of COVID-19	Bachelor's degree or higher	$50,000 - $74,999		89 County region	18-24	2	No	Yes, AA oversample	Male 18 thru 24	0.312422	1.24847	0.390049	1.32018	0.412453	1.24389	0.513046	0.8773	0.548176
1	20	Male	Macon County	Yes	No	Yes	No	No	No	Work part-time	Divorced	Yes	No	Extremely concerned	Very concerned	Very concerned	Very concerned	Economic impacts of COVID-19	High school graduate or GED	Less than $15,000		89 County region	18-24	2	No	Yes, AA oversample	Male 18 thru 24	0.312422	1.24847	0.390049	1.32018	0.412453	1.24389	0.513046	0.8773	0.548176
1	21	Female	Montgomery County	No	No	Yes	No	No	No	Work part-time	Dating	No	Yes	Extremely concerned	Extremely concerned	Somewhat concerned	Somewhat concerned	Health impacts of COVID-19	Some college or associate's degree	$35,000 - $49,999		89 County region	18-24	1	No	Yes, AA oversample	Female 18 thru 24	0.312422	0.736171	0.229996	1.32018	0.412453	0.698121	0.287942	0.394655	0.246598
1	41	Female	Cocke County	No	No	Yes	No	No	No	Stay-at-Home Caregiver	Living with someone	No	Yes	Extremely concerned	Extremely concerned	Extremely concerned	Very concerned	Health impacts of COVID-19	Some college or associate's degree	$25,000 - $34,999		89 County region	35-44	1	No	Yes, AA oversample	Female 35 thru 44	0.312422	0.833217	0.260315	1.32018	0.412453	0.802961	0.331184	0.733349	0.458229
1	29	Male	McMinn County	No	No	Yes	No	No	No	Work part-time	Single	Yes	No	Extremely concerned	Somewhat concerned	Somewhat concerned	Extremely concerned	Health impacts of COVID-19	Some college or associate's degree	Less than $15,000		89 County region	25-34	1	No	Yes, AA oversample	Male 25 thru 34	0.312422	1.23146	0.384736	1.32018	0.412453	1.31307	0.541579	1.15163	0.719589
1	40	Male	Rutherford County	No	No	Yes	No	No	No	Work full-time	Living with someone	No	No	Somewhat concerned	Somewhat concerned	Very concerned	Somewhat concerned	Economic impacts of COVID-19	Bachelor's degree or higher	$50,000 - $74,999		89 County region	35-44	1	No	Yes, AA oversample	Male 35 thru 44	0.312422	0.924303	0.288773	1.32018	0.412453	0.954872	0.39384	1.07527	0.671879
1	51	Male	Maury County	No	No	Yes	No	No	No	Unemployed	Married	No	No	Not at all concerned	Not at all concerned	Somewhat concerned	Somewhat concerned	Economic impacts of COVID-19	Some college or associate's degree	$35,000 - $49,999		89 County region	45-54	1	No	Yes, AA oversample	Male 45 thru 54	0.312422	1.57634	0.492485	1.32018	0.412453	1.43334	0.591186	1.51878	0.948998
1	19	Female	Rutherford County	No	No	Yes	No	No	No	Student	Single	Yes	Yes	Extremely concerned	Extremely concerned	Extremely concerned	Extremely concerned	Health impacts of COVID-19	High school graduate or GED	$35,000 - $49,999		89 County region	18-24	1	No	Yes, AA oversample	Female 18 thru 24	0.312422	0.736171	0.229996	1.32018	0.412453	0.698121	0.287942	0.394655	0.246598
1	19	Male	Bradley County	No	No	Yes	No	No	No	Work full-time	Dating	No	Yes	Not very concerned	Extremely concerned	Extremely concerned	Extremely concerned	Health impacts of COVID-19	Bachelor's degree or higher	Less than $15,000		89 County region	18-24	1	No	Yes, AA oversample	Male 18 thru 24	0.312422	1.24847	0.390049	1.32018	0.412453	1.24389	0.513046	0.8773	0.548176
1	18	Female	Sumner County	No	No	Yes	No	No	No	Student	Separated	No	No	Extremely concerned	Very concerned	Very concerned	Extremely concerned	Health impacts of COVID-19	High school graduate or GED	$15,000 - $24,999		89 County region	18-24	1	No	Yes, AA oversample	Female 18 thru 24	0.312422	0.736171	0.229996	1.32018	0.412453	0.698121	0.287942	0.394655	0.246598
1	41	Male	Montgomery County	No	No	Yes	No	No	No	Work full-time	Married	Yes	No	Not very concerned	Somewhat concerned	Not very concerned	Not very concerned	Economic impacts of COVID-19	High school graduate or GED	$35,000 - $49,999		89 County region	35-44	1	No	Yes, AA oversample	Male 35 thru 44	0.312422	0.924303	0.288773	1.32018	0.412453	0.954872	0.39384	1.07527	0.671879
1	20	Male	Rutherford County	No	No	Yes	No	No	No	Work part-time	Dating	No	No	Somewhat concerned	Extremely concerned	Extremely concerned	Very concerned	Health impacts of COVID-19	Some college or associate's degree	$35,000 - $49,999		89 County region	18-24	1	No	Yes, AA oversample	Male 18 thru 24	0.312422	1.24847	0.390049	1.32018	0.412453	1.24389	0.513046	0.8773	0.548176
1	19	Female	Montgomery County	No	No	Yes	No	No	No	Work part-time	Single	No	No	Not very concerned	Somewhat concerned	Somewhat concerned	Very concerned	Economic impacts of COVID-19	Some college or associate's degree	$25,000 - $34,999		89 County region	18-24	1	No	Yes, AA oversample	Female 18 thru 24	0.312422	0.736171	0.229996	1.32018	0.412453	0.698121	0.287942	0.394655	0.246598
1	44	Male	Fayette County	No	No	Yes	No	No	No	Work full-time	Married	Yes	No	Very concerned	Very concerned	Extremely concerned	Somewhat concerned	Economic impacts of COVID-19	Bachelor's degree or higher	$100,000 - $149,999		89 County region	35-44	1	No	Yes, AA oversample	Male 35 thru 44	0.312422	0.924303	0.288773	1.32018	0.412453	0.954872	0.39384	1.07527	0.671879
1	20	Female	Montgomery County	Yes	No	Yes	No	No	No	Unemployed	Single	No	No	Extremely concerned	Extremely concerned	Extremely concerned	Extremely concerned	Health impacts of COVID-19	High school graduate or GED	Less than $15,000		89 County region	18-24	2	No	Yes, AA oversample	Female 18 thru 24	0.312422	0.736171	0.229996	1.32018	0.412453	0.698121	0.287942	0.394655	0.246598
1	67	Female	Washington County	No	No	Yes	No	No	No	Retired	Divorced	No	Yes	Not very concerned	Not at all concerned	Not very concerned	Somewhat concerned	Health impacts of COVID-19	Some college or associate's degree	$25,000 - $34,999		89 County region	65+	1	No	Yes, AA oversample	Female 65+	0.312422	1.07058	0.334472	1.32018	0.412453	1.05035	0.433218	1.47113	0.919227
1	19	Female	Gibson County	No	No	Yes	No	No	No	Student	Single	No	No	Very concerned	Very concerned	Very concerned	Very concerned	Economic impacts of COVID-19	High school graduate or GED	$15,000 - $24,999		89 County region	18-24	1	No	Yes, AA oversample	Female 18 thru 24	0.312422	0.736171	0.229996	1.32018	0.412453	0.698121	0.287942	0.394655	0.246598
1	47	Female	Rutherford County	No	No	Yes	No	No	No	Work full-time	Married	Yes	No	Somewhat concerned	Extremely concerned	Extremely concerned	Extremely concerned	Health impacts of COVID-19	High school graduate or GED	$75,000 - $99,999		89 County region	45-54	1	No	Yes, AA oversample	Female 45 thru 54	0.312422	0.873441	0.272882	1.32018	0.412453	0.850522	0.350801	0.900985	0.562975
1	51	Male	Henry County	No	No	Yes	No	No	No	Unemployed	Single	No	No	Very concerned	Somewhat concerned	Somewhat concerned	Somewhat concerned	Economic impacts of COVID-19	High school graduate or GED	Less than $15,000		89 County region	45-54	1	No	Yes, AA oversample	Male 45 thru 54	0.312422	1.57634	0.492485	1.32018	0.412453	1.43334	0.591186	1.51878	0.948998
1	18	Female	Jackson County	No	No	Yes	No	No	No	Work part-time	Single	No	No	Very concerned	Very concerned	Somewhat concerned	Somewhat concerned	Health impacts of COVID-19	High school graduate or GED	$35,000 - $49,999		89 County region	18-24	1	No	Yes, AA oversample	Female 18 thru 24	0.312422	0.736171	0.229996	1.32018	0.412453	0.698121	0.287942	0.394655	0.246598
1	42	Female	Montgomery County	No	No	Yes	No	No	No	Work full-time	Single	No	Yes	Extremely concerned	Extremely concerned	Very concerned	Very concerned	Health impacts of COVID-19	Bachelor's degree or higher	$150,000 or more		89 County region	35-44	1	No	Yes, AA oversample	Female 35 thru 44	0.312422	0.833217	0.260315	1.32018	0.412453	0.802961	0.331184	0.733349	0.458229
1	25	Female	Washington County	No	No	Yes	No	No	No	Work full-time	Married	Yes	Yes	Extremely concerned	Very concerned	Extremely concerned	Extremely concerned	Health impacts of COVID-19	High school graduate or GED	Less than $15,000		89 County region	25-34	1	No	Yes, AA oversample	Female 25 thru 34	0.312422	0.809019	0.252755	1.32018	0.412453	0.854477	0.352432	0.857145	0.535582
1	66	Female	Robertson County	No	No	Yes	No	No	No	Work full-time	Married	No	Yes	Very concerned	Very concerned	Extremely concerned	Extremely concerned	Health impacts of COVID-19	Bachelor's degree or higher	$75,000 - $99,999		89 County region	65+	1	No	Yes, AA oversample	Female 65+	0.312422	1.07058	0.334472	1.32018	0.412453	1.05035	0.433218	1.47113	0.919227
1	50	Female	Henderson County	No	No	Yes	No	No	No	Unemployed	Divorced	No	Yes	Somewhat concerned	Somewhat concerned	Somewhat concerned	Very concerned	Health impacts of COVID-19	Some college or associate's degree	Less than $15,000		89 County region	45-54	1	No	Yes, AA oversample	Female 45 thru 54	0.312422	0.873441	0.272882	1.32018	0.412453	0.850522	0.350801	0.900985	0.562975
1	20	Female	McMinn County	No	No	Yes	No	Yes	No	Student	Single	No	No	Not at all concerned	Not at all concerned	Very concerned	Extremely concerned	Health impacts of COVID-19	Less than high school graduate	$50,000 - $74,999		89 County region	18-24	2	No	Yes, AA oversample	Female 18 thru 24	0.312422	0.736171	0.229996	1.32018	0.412453	0.698121	0.287942	0.394655	0.246598
1	38	Female	Bradley County	No	No	Yes	No	No	No	Unemployed	Single	No	No	Not very concerned	Somewhat concerned	Somewhat concerned	Very concerned	Economic impacts of COVID-19	High school graduate or GED	Less than $15,000		89 County region	35-44	1	No	Yes, AA oversample	Female 35 thru 44	0.312422	0.833217	0.260315	1.32018	0.412453	0.802961	0.331184	0.733349	0.458229
1	18	Female	Maury County	No	No	Yes	No	No	No	Student	Single	No	Yes	Not at all concerned	Somewhat concerned	Somewhat concerned	Very concerned	Economic impacts of COVID-19	High school graduate or GED	$100,000 - $149,999		89 County region	18-24	1	No	Yes, AA oversample	Female 18 thru 24	0.312422	0.736171	0.229996	1.32018	0.412453	0.698121	0.287942	0.394655	0.246598
1	64	Female	Coffee County	No	No	Yes	No	No	No	Stay-at-Home Caregiver	Married	No	No	Not at all concerned	Somewhat concerned	Somewhat concerned	Very concerned	Economic impacts of COVID-19	Some college or associate's degree	$50,000 - $74,999		89 County region	55-64	1	No	Yes, AA oversample	Female 55 thru 64	0.312422	0.871068	0.272141	1.32018	0.412453	0.862899	0.355906	1.04624	0.653738
1	20	Female	Coffee County	Yes	No	Yes	No	No	No	Work part-time	Living with someone	No	Yes	Not very concerned	Not at all concerned	Not very concerned	Very concerned	Economic impacts of COVID-19	Bachelor's degree or higher	$15,000 - $24,999		89 County region	18-24	2	No	Yes, AA oversample	Female 18 thru 24	0.312422	0.736171	0.229996	1.32018	0.412453	0.698121	0.287942	0.394655	0.246598
1	37	Female	Williamson County	No	No	Yes	No	No	No	Work full-time	Married	Yes	No	Very concerned	Extremely concerned	Extremely concerned	Extremely concerned	Health impacts of COVID-19	Bachelor's degree or higher	$50,000 - $74,999		89 County region	35-44	1	No	Yes, AA oversample	Female 35 thru 44	0.312422	0.833217	0.260315	1.32018	0.412453	0.802961	0.331184	0.733349	0.458229
1	25	Female	Union County	No	No	Yes	No	No	No	Work part-time	Divorced	Yes	Yes	Somewhat concerned	Extremely concerned	Very concerned	Very concerned	Health impacts of COVID-19	Less than high school graduate	$15,000 - $24,999		89 County region	25-34	1	No	Yes, AA oversample	Female 25 thru 34	0.312422	0.809019	0.252755	1.32018	0.412453	0.854477	0.352432	0.857145	0.535582
1	40	Female	Maury County	No	No	Yes	No	No	No	Work full-time	Single	Yes	No	Not very concerned	Somewhat concerned	Somewhat concerned	Very concerned	Health impacts of COVID-19	Bachelor's degree or higher	$35,000 - $49,999		89 County region	35-44	1	No	Yes, AA oversample	Female 35 thru 44	0.312422	0.833217	0.260315	1.32018	0.412453	0.802961	0.331184	0.733349	0.458229
1	20	Female	Bradley County	No	No	Yes	No	No	No	Work full-time	Single	No	Yes	Somewhat concerned	Extremely concerned	Extremely concerned	Somewhat concerned	Health impacts of COVID-19	Some college or associate's degree	$100,000 - $149,999		89 County region	18-24	1	No	Yes, AA oversample	Female 18 thru 24	0.312422	0.736171	0.229996	1.32018	0.412453	0.698121	0.287942	0.394655	0.246598
1	31	Female	Montgomery County	No	No	Yes	No	No	No	Unemployed	Single	No	Yes	Extremely concerned	Extremely concerned	Extremely concerned	Extremely concerned	Health impacts of COVID-19	Less than high school graduate	$15,000 - $24,999		89 County region	25-34	1	No	Yes, AA oversample	Female 25 thru 34	0.312422	0.809019	0.252755	1.32018	0.412453	0.854477	0.352432	0.857145	0.535582
1	65	Female	Haywood County	No	No	Yes	No	No	No	Retired	Divorced	No	Yes	Somewhat concerned	Somewhat concerned	Not very concerned	Very concerned	Health impacts of COVID-19	Some college or associate's degree	$75,000 - $99,999		89 County region	65+	1	No	Yes, AA oversample	Female 65+	0.312422	1.07058	0.334472	1.32018	0.412453	1.05035	0.433218	1.47113	0.919227
1	24	Female	Haywood County	No	No	Yes	No	No	No	Unemployed	Single	Yes	No	Very concerned	Extremely concerned	Extremely concerned	Extremely concerned	Economic impacts of COVID-19	High school graduate or GED	Less than $15,000		89 County region	18-24	1	No	Yes, AA oversample	Female 18 thru 24	0.312422	0.736171	0.229996	1.32018	0.412453	0.698121	0.287942	0.394655	0.246598
1	23	Female	Chester County	No	No	Yes	No	No	No	Unemployed	Single	No	Yes	Somewhat concerned	Very concerned	Extremely concerned	Extremely concerned	Economic impacts of COVID-19	Less than high school graduate	$35,000 - $49,999		89 County region	18-24	1	No	Yes, AA oversample	Female 18 thru 24	0.312422	0.736171	0.229996	1.32018	0.412453	0.698121	0.287942	0.394655	0.246598
1	25	Female	Rutherford County	No	No	Yes	No	No	No	Work part-time	Dating	No	No	Not very concerned	Somewhat concerned	Somewhat concerned	Very concerned	Economic impacts of COVID-19	Bachelor's degree or higher	$15,000 - $24,999		89 County region	25-34	1	No	Yes, AA oversample	Female 25 thru 34	0.312422	0.809019	0.252755	1.32018	0.412453	0.854477	0.352432	0.857145	0.535582
1	19	Male	Macon County	No	No	Yes	No	No	Yes	Work part-time	Divorced	No	No	Not at all concerned	Very concerned	Not very concerned	Somewhat concerned	Health impacts of COVID-19	High school graduate or GED	Less than $15,000		89 County region	18-24	2	No	Yes, AA oversample	Male 18 thru 24	0.312422	1.24847	0.390049	1.32018	0.412453	1.24389	0.513046	0.8773	0.548176
1	45	Female	Sumner County	No	No	Yes	No	No	No	Work full-time	Married	No	No	Not at all concerned	Not very concerned	Very concerned	Extremely concerned	Economic impacts of COVID-19	Some college or associate's degree	$100,000 - $149,999		89 County region	45-54	1	No	Yes, AA oversample	Female 45 thru 54	0.312422	0.873441	0.272882	1.32018	0.412453	0.850522	0.350801	0.900985	0.562975
1	35	Female	Monroe County	No	No	Yes	No	No	No	Work part-time	Living with someone	No	Yes	Very concerned	Extremely concerned	Extremely concerned	Extremely concerned	Health impacts of COVID-19	High school graduate or GED	Less than $15,000		89 County region	35-44	1	No	Yes, AA oversample	Female 35 thru 44	0.312422	0.833217	0.260315	1.32018	0.412453	0.802961	0.331184	0.733349	0.458229
1	29	Female	Montgomery County	Yes	No	Yes	Yes	Yes	No	Stay-at-Home Caregiver	Living with someone	No	No	Not very concerned	Very concerned	Extremely concerned	Very concerned	Economic impacts of COVID-19	Some college or associate's degree	Less than $15,000		89 County region	25-34	4	No	Yes, AA oversample	Female 25 thru 34	0.312422	0.809019	0.252755	1.32018	0.412453	0.854477	0.352432	0.857145	0.535582
1	28	Female	White County	No	No	Yes	No	No	No	Unemployed	Single	No	Yes	Extremely concerned	Very concerned	Somewhat concerned	Very concerned	Health impacts of COVID-19	High school graduate or GED	Less than $15,000		89 County region	25-34	1	No	Yes, AA oversample	Female 25 thru 34	0.312422	0.809019	0.252755	1.32018	0.412453	0.854477	0.352432	0.857145	0.535582
1	32	Female	Monroe County	No	No	Yes	No	No	No	Unemployed	Living with someone	Yes	Yes	Somewhat concerned	Very concerned	Not very concerned	Very concerned	Economic impacts of COVID-19	High school graduate or GED	Less than $15,000		89 County region	25-34	1	No	Yes, AA oversample	Female 25 thru 34	0.312422	0.809019	0.252755	1.32018	0.412453	0.854477	0.352432	0.857145	0.535582
1	59	Female	Montgomery County	No	No	Yes	No	No	No	Retired	Married	No	Yes	Very concerned	Very concerned	Very concerned	Very concerned	Health impacts of COVID-19	Some college or associate's degree	$15,000 - $24,999		89 County region	55-64	1	No	Yes, AA oversample	Female 55 thru 64	0.312422	0.871068	0.272141	1.32018	0.412453	0.862899	0.355906	1.04624	0.653738
1	54	Male	Greene County	No	No	Yes	No	No	No	Work part-time	Married	Yes	No	Somewhat concerned	Somewhat concerned	Somewhat concerned	Extremely concerned	Economic impacts of COVID-19	Bachelor's degree or higher	$25,000 - $34,999		89 County region	45-54	1	No	Yes, AA oversample	Male 45 thru 54	0.312422	1.57634	0.492485	1.32018	0.412453	1.43334	0.591186	1.51878	0.948998
1	26	Female	Rutherford County	No	No	Yes	No	No	No	Work part-time	Living with someone	No	No	Somewhat concerned	Somewhat concerned	Extremely concerned	Extremely concerned	Economic impacts of COVID-19	Some college or associate's degree	$75,000 - $99,999		89 County region	25-34	1	No	Yes, AA oversample	Female 25 thru 34	0.312422	0.809019	0.252755	1.32018	0.412453	0.854477	0.352432	0.857145	0.535582
1	35	Male	Montgomery County	No	No	Yes	No	No	No	Work full-time	Single	No	Yes	Extremely concerned	Somewhat concerned	Very concerned	Very concerned	Economic impacts of COVID-19	Bachelor's degree or higher	$35,000 - $49,999		89 County region	35-44	1	No	Yes, AA oversample	Male 35 thru 44	0.312422	0.924303	0.288773	1.32018	0.412453	0.954872	0.39384	1.07527	0.671879
1	18	Female	Hardeman County	No	No	Yes	No	No	No	Student	Single	Yes	No	Extremely concerned	Extremely concerned	Extremely concerned	Extremely concerned	Health impacts of COVID-19	Bachelor's degree or higher	$35,000 - $49,999		89 County region	18-24	1	No	Yes, AA oversample	Female 18 thru 24	0.312422	0.736171	0.229996	1.32018	0.412453	0.698121	0.287942	0.394655	0.246598
1	27	Female	Rutherford County	No	No	Yes	No	No	No	Work full-time	Single	No	No	Extremely concerned	Extremely concerned	Extremely concerned	Extremely concerned	Health impacts of COVID-19	Bachelor's degree or higher	$35,000 - $49,999		89 County region	25-34	1	No	Yes, AA oversample	Female 25 thru 34	0.312422	0.809019	0.252755	1.32018	0.412453	0.854477	0.352432	0.857145	0.535582
1	26	Female	Rutherford County	No	No	Yes	No	No	No	Work part-time	Single	Yes	No	Somewhat concerned	Extremely concerned	Extremely concerned	Very concerned	Health impacts of COVID-19	Some college or associate's degree	$25,000 - $34,999		89 County region	25-34	1	No	Yes, AA oversample	Female 25 thru 34	0.312422	0.809019	0.252755	1.32018	0.412453	0.854477	0.352432	0.857145	0.535582
1	40	Male	Robertson County	No	No	Yes	No	No	No	Work full-time	Married	Yes	Yes	Extremely concerned	Extremely concerned	Extremely concerned	Extremely concerned	Economic impacts of COVID-19	Some college or associate's degree	$50,000 - $74,999		89 County region	35-44	1	No	Yes, AA oversample	Male 35 thru 44	0.312422	0.924303	0.288773	1.32018	0.412453	0.954872	0.39384	1.07527	0.671879
1	19	Male	Lauderdale County	No	No	Yes	No	No	No	Work full-time	Divorced	No	No	Somewhat concerned	Somewhat concerned	Not at all concerned	Somewhat concerned	Health impacts of COVID-19	Some college or associate's degree	$15,000 - $24,999		89 County region	18-24	1	No	Yes, AA oversample	Male 18 thru 24	0.312422	1.24847	0.390049	1.32018	0.412453	1.24389	0.513046	0.8773	0.548176
1	27	Female	Claiborne County	No	No	Yes	No	No	No	Work full-time	Single	No	Yes	Extremely concerned	Very concerned	Extremely concerned	Very concerned	Economic impacts of COVID-19	Some college or associate's degree	Less than $15,000		89 County region	25-34	1	No	Yes, AA oversample	Female 25 thru 34	0.312422	0.809019	0.252755	1.32018	0.412453	0.854477	0.352432	0.857145	0.535582
1	36	Male	Coffee County	No	No	Yes	No	No	No	Work full-time	Living with someone	Yes	No	Very concerned	Somewhat concerned	Very concerned	Very concerned	Health impacts of COVID-19	Some college or associate's degree	$75,000 - $99,999		89 County region	35-44	1	No	Yes, AA oversample	Male 35 thru 44	0.312422	0.924303	0.288773	1.32018	0.412453	0.954872	0.39384	1.07527	0.671879
1	20	Male	Chester County	No	Yes	Yes	No	No	No	Work full-time	Married	Yes	No	Not at all concerned	Somewhat concerned	Not very concerned	Very concerned	Health impacts of COVID-19	Less than high school graduate	Less than $15,000		89 County region	18-24	2	No	Yes, AA oversample	Male 18 thru 24	0.312422	1.24847	0.390049	1.32018	0.412453	1.24389	0.513046	0.8773	0.548176
1	42	Male	Tipton County	No	No	Yes	No	No	No	Work full-time	Single	Yes	No	Extremely concerned	Extremely concerned	Extremely concerned	Very concerned	Economic impacts of COVID-19	High school graduate or GED	$35,000 - $49,999		89 County region	35-44	1	No	Yes, AA oversample	Male 35 thru 44	0.312422	0.924303	0.288773	1.32018	0.412453	0.954872	0.39384	1.07527	0.671879
1	18	Female	Cheatham County	No	No	Yes	No	Yes	No	Looking for work	Single	Yes	No	Not very concerned	Very concerned	Somewhat concerned	Somewhat concerned	Economic impacts of COVID-19	High school graduate or GED	$35,000 - $49,999		89 County region	18-24	2	No	Yes, AA oversample	Female 18 thru 24	0.312422	0.736171	0.229996	1.32018	0.412453	0.698121	0.287942	0.394655	0.246598
1	19	Male	Bedford County	No	No	Yes	No	No	No	Work full-time	Separated	No	No	Extremely concerned			Not very concerned	Health impacts of COVID-19	High school graduate or GED	Less than $15,000		89 County region	18-24	1	No	Yes, AA oversample	Male 18 thru 24	0.312422	1.24847	0.390049	1.32018	0.412453	1.24389	0.513046	0.8773	0.548176
1	21	Male	Henry County	No	No	Yes	No	Yes	No	Student	Single	No	No	Very concerned	Somewhat concerned	Somewhat concerned	Somewhat concerned	Health impacts of COVID-19	Some college or associate's degree	$25,000 - $34,999		89 County region	18-24	2	No	Yes, AA oversample	Male 18 thru 24	0.312422	1.24847	0.390049	1.32018	0.412453	1.24389	0.513046	0.8773	0.548176
1	43	Male	Montgomery County	No	No	Yes	No	No	No	Unemployed	Single	No	Yes	Extremely concerned	Extremely concerned	Extremely concerned	Extremely concerned	Health impacts of COVID-19	Some college or associate's degree	$15,000 - $24,999		89 County region	35-44	1	No	Yes, AA oversample	Male 35 thru 44	0.312422	0.924303	0.288773	1.32018	0.412453	0.954872	0.39384	1.07527	0.671879
1	26	Female	Rutherford County	No	No	Yes	No	No	No	Work full-time	Single	No	No	Not very concerned	Not at all concerned	Somewhat concerned	Very concerned	Health impacts of COVID-19	Some college or associate's degree	$25,000 - $34,999		89 County region	25-34	1	No	Yes, AA oversample	Female 25 thru 34	0.312422	0.809019	0.252755	1.32018	0.412453	0.854477	0.352432	0.857145	0.535582
1	18	Female	Anderson County	No	No	Yes	No	No	No	Unemployed	Single	No	No	Somewhat concerned	Very concerned	Very concerned	Very concerned	Health impacts of COVID-19	Less than high school graduate	$75,000 - $99,999		89 County region	18-24	1	No	Yes, AA oversample	Female 18 thru 24	0.312422	0.736171	0.229996	1.32018	0.412453	0.698121	0.287942	0.394655	0.246598
1	21	Female	Marion County	No	No	Yes	No	No	No	Work full-time	Married	No	No	Very concerned	Very concerned	Very concerned	Not very concerned	Economic impacts of COVID-19	Bachelor's degree or higher	$35,000 - $49,999		89 County region	18-24	1	No	Yes, AA oversample	Female 18 thru 24	0.312422	0.736171	0.229996	1.32018	0.412453	0.698121	0.287942	0.394655	0.246598
1	433	Male	Decatur County	No	No	Yes	No	No	No	Work full-time	Married	No	No	Extremely concerned	Extremely concerned	Extremely concerned	Extremely concerned	Health impacts of COVID-19	High school graduate or GED	Less than $15,000		89 County region	65+	1	No	Yes, AA oversample	Male 65+	0.312422	1.16223	0.363106	1.32018	0.412453	1.31733	0.543338	4.97062	3.10587
1	24	Male	Obion County	No	No	Yes	No	No	No	Work full-time	Married	No	No	Somewhat concerned	Very concerned	Very concerned	Very concerned	Economic impacts of COVID-19	Some college or associate's degree	$25,000 - $34,999		89 County region	18-24	1	No	Yes, AA oversample	Male 18 thru 24	0.312422	1.24847	0.390049	1.32018	0.412453	1.24389	0.513046	0.8773	0.548176
1	24	Female	Tipton County	No	No	Yes	No	No	No	Work part-time	Married	Yes	No	Extremely concerned	Extremely concerned	Extremely concerned	Extremely concerned	Health impacts of COVID-19	Bachelor's degree or higher	$25,000 - $34,999		89 County region	18-24	1	No	Yes, AA oversample	Female 18 thru 24	0.312422	0.736171	0.229996	1.32018	0.412453	0.698121	0.287942	0.394655	0.246598
1	24	Male	Rutherford County	No	No	Yes	No	No	No	Looking for work	Single	No	No	Somewhat concerned	Very concerned	Somewhat concerned	Somewhat concerned	Economic impacts of COVID-19	Some college or associate's degree	Less than $15,000		89 County region	18-24	1	No	Yes, AA oversample	Male 18 thru 24	0.312422	1.24847	0.390049	1.32018	0.412453	1.24389	0.513046	0.8773	0.548176
1	28	Female	Sumner County	No	No	Yes	No	No	No	Work full-time	Living with someone	No	No	Very concerned	Very concerned	Extremely concerned	Very concerned	Health impacts of COVID-19	High school graduate or GED	$25,000 - $34,999		89 County region	25-34	1	No	Yes, AA oversample	Female 25 thru 34	0.312422	0.809019	0.252755	1.32018	0.412453	0.854477	0.352432	0.857145	0.535582
1	20	Male	Lauderdale County	No	No	Yes	No	No	No	Student	Divorced	No	No	Somewhat concerned	Very concerned	Very concerned	Extremely concerned	Health impacts of COVID-19	High school graduate or GED	$15,000 - $24,999		89 County region	18-24	1	No	Yes, AA oversample	Male 18 thru 24	0.312422	1.24847	0.390049	1.32018	0.412453	1.24389	0.513046	0.8773	0.548176
1	34	Female	Bledsoe County	No	No	Yes	No	No	No	Stay-at-Home Caregiver	Dating	No	Yes	Very concerned	Very concerned	Extremely concerned	Very concerned	Health impacts of COVID-19	High school graduate or GED	Less than $15,000		89 County region	25-34	1	No	Yes, AA oversample	Female 25 thru 34	0.312422	0.809019	0.252755	1.32018	0.412453	0.854477	0.352432	0.857145	0.535582
1	32	Female	Bradley County	No	No	Yes	No	No	No	Work full-time	Married	Yes	No	Somewhat concerned	Somewhat concerned	Somewhat concerned	Somewhat concerned	Health impacts of COVID-19	Some college or associate's degree	$75,000 - $99,999		89 County region	25-34	1	No	Yes, AA oversample	Female 25 thru 34	0.312422	0.809019	0.252755	1.32018	0.412453	0.854477	0.352432	0.857145	0.535582
1	21	Male	Hardeman County	No	No	Yes	No	No	No	Work full-time	Divorced	No	No	Very concerned	Extremely concerned	Very concerned	Somewhat concerned	Health impacts of COVID-19	Some college or associate's degree	$100,000 - $149,999		89 County region	18-24	1	No	Yes, AA oversample	Male 18 thru 24	0.312422	1.24847	0.390049	1.32018	0.412453	1.24389	0.513046	0.8773	0.548176
1	63	Female	Wayne County	No	No	Yes	No	No	No	Retired	Divorced	No	No	Very concerned	Extremely concerned	Very concerned	Very concerned	Health impacts of COVID-19	Some college or associate's degree	Less than $15,000		89 County region	55-64	1	No	Yes, AA oversample	Female 55 thru 64	0.312422	0.871068	0.272141	1.32018	0.412453	0.862899	0.355906	1.04624	0.653738
1	18	Female	Sumner County	No	No	Yes	No	No	No	Work part-time	Separated	No	No	Very concerned	Somewhat concerned	Somewhat concerned	Extremely concerned	Economic impacts of COVID-19	High school graduate or GED	$25,000 - $34,999		89 County region	18-24	1	No	Yes, AA oversample	Female 18 thru 24	0.312422	0.736171	0.229996	1.32018	0.412453	0.698121	0.287942	0.394655	0.246598
1	19	Female	Cocke County	No	No	Yes	No	No	No	Unemployed	Dating	Yes	Yes	Somewhat concerned	Somewhat concerned	Very concerned	Very concerned	Health impacts of COVID-19	High school graduate or GED	$15,000 - $24,999		89 County region	18-24	1	No	Yes, AA oversample	Female 18 thru 24	0.312422	0.736171	0.229996	1.32018	0.412453	0.698121	0.287942	0.394655	0.246598
1	25	Male	Bedford County	No	No	Yes	No	No	No	Work part-time	Separated	No	Yes	Extremely concerned	Not at all concerned	Not at all concerned	Not at all concerned	Economic impacts of COVID-19	High school graduate or GED	Less than $15,000		89 County region	25-34	1	No	Yes, AA oversample	Male 25 thru 34	0.312422	1.23146	0.384736	1.32018	0.412453	1.31307	0.541579	1.15163	0.719589
1	41	Male	Rutherford County	No	No	Yes	No	No	No	Unemployed	Single	Yes	No	Somewhat concerned	Somewhat concerned	Somewhat concerned	Somewhat concerned	Health impacts of COVID-19	Some college or associate's degree	$35,000 - $49,999		89 County region	35-44	1	No	Yes, AA oversample	Male 35 thru 44	0.312422	0.924303	0.288773	1.32018	0.412453	0.954872	0.39384	1.07527	0.671879
1	41	Male	Gibson County	No	No	Yes	No	No	No	Work part-time	Living with someone	Yes	No	Very concerned	Very concerned	Very concerned	Somewhat concerned	Economic impacts of COVID-19	Some college or associate's degree	$35,000 - $49,999		89 County region	35-44	1	No	Yes, AA oversample	Male 35 thru 44	0.312422	0.924303	0.288773	1.32018	0.412453	0.954872	0.39384	1.07527	0.671879
1	34	Male	Montgomery County	No	No	Yes	No	No	No	Work full-time	Single	No	No	Somewhat concerned	Very concerned	Very concerned	Very concerned	Economic impacts of COVID-19	Some college or associate's degree	$15,000 - $24,999		89 County region	25-34	1	No	Yes, AA oversample	Male 25 thru 34	0.312422	1.23146	0.384736	1.32018	0.412453	1.31307	0.541579	1.15163	0.719589
1	30	Female	Williamson County	No	No	Yes	No	No	No	Work full-time	Living with someone	Yes	No	Extremely concerned	Extremely concerned	Extremely concerned	Extremely concerned	Health impacts of COVID-19	Some college or associate's degree	$50,000 - $74,999		89 County region	25-34	1	No	Yes, AA oversample	Female 25 thru 34	0.312422	0.809019	0.252755	1.32018	0.412453	0.854477	0.352432	0.857145	0.535582
1	44	Female	Washington County	No	No	Yes	No	No	No	Unemployed	Married	Yes	Yes	Extremely concerned	Very concerned	Extremely concerned	Extremely concerned	Health impacts of COVID-19	Bachelor's degree or higher	$50,000 - $74,999		89 County region	35-44	1	No	Yes, AA oversample	Female 35 thru 44	0.312422	0.833217	0.260315	1.32018	0.412453	0.802961	0.331184	0.733349	0.458229
1	26	Male	McMinn County	No	No	Yes	No	No	No	Work full-time	Single	No	No	Not very concerned	Not very concerned	Somewhat concerned	Not very concerned	Economic impacts of COVID-19	Bachelor's degree or higher	$15,000 - $24,999		89 County region	25-34	1	No	Yes, AA oversample	Male 25 thru 34	0.312422	1.23146	0.384736	1.32018	0.412453	1.31307	0.541579	1.15163	0.719589
1	39	Female	Rutherford County	No	No	Yes	No	No	No	Stay-at-Home Caregiver	Divorced	Yes	Yes	Extremely concerned	Extremely concerned	Extremely concerned	Extremely concerned	Health impacts of COVID-19	Less than high school graduate	$50,000 - $74,999		89 County region	35-44	1	No	Yes, AA oversample	Female 35 thru 44	0.312422	0.833217	0.260315	1.32018	0.412453	0.802961	0.331184	0.733349	0.458229
1	25	Female	Tipton County	No	No	Yes	No	No	No	Work full-time	Dating	Yes	No	Extremely concerned	Extremely concerned	Extremely concerned	Extremely concerned	Health impacts of COVID-19	Less than high school graduate	Less than $15,000		89 County region	25-34	1	No	Yes, AA oversample	Female 25 thru 34	0.312422	0.809019	0.252755	1.32018	0.412453	0.854477	0.352432	0.857145	0.535582
1	37	Female	Maury County	No	No	Yes	No	No	No	Work full-time	Married	Yes	No	Somewhat concerned	Extremely concerned	Extremely concerned	Extremely concerned	Economic impacts of COVID-19	Bachelor's degree or higher	$150,000 or more		89 County region	35-44	1	No	Yes, AA oversample	Female 35 thru 44	0.312422	0.833217	0.260315	1.32018	0.412453	0.802961	0.331184	0.733349	0.458229
1	20	Female	Rutherford County	No	No	Yes	No	No	No	Unemployed	Single	No	No	Not very concerned	Not very concerned	Not very concerned	Somewhat concerned	Health impacts of COVID-19	High school graduate or GED			89 County region	18-24	1	No	Yes, AA oversample	Female 18 thru 24	0.312422	0.736171	0.229996	1.32018	0.412453	0.698121	0.287942	0.394655	0.246598
2	64	Female	Shelby County	No	No	No	No	Yes	No	Retired	Separated	No	Yes	Extremely concerned	Very concerned	Very concerned	Extremely concerned	Health impacts of COVID-19	Bachelor's degree or higher	$25,000 - $34,999		6 County region	55-64	1	No	No	Female 55 thru 64	1	0.850711	0.850711	0.730096	0.730096	0.862899	0.629999
2	71	Male	Davidson County	Yes	No	No	No	Yes	No	Work part-time	Divorced	No	Yes	Somewhat concerned	Somewhat concerned	Somewhat concerned	Extremely concerned	Health impacts of COVID-19	Bachelor's degree or higher	$25,000 - $34,999		6 County region	65+	2	No	No	Male 65+	1	1.7571	1.7571	0.730096	0.730096	1.31733	0.961778
2	43	Female	Hamilton County	No	No	No	No	Yes	No	Work part-time	Married	Yes	No	Somewhat concerned	Somewhat concerned	Somewhat concerned	Extremely concerned	Economic impacts of COVID-19	Bachelor's degree or higher	$100,000 - $149,999		6 County region	35-44	1	No	No	Female 35 thru 44	1	0.763453	0.763453	0.730096	0.730096	0.802961	0.586239
2	41	Female	Hamilton County	No	No	No	No	Yes	No	Stay-at-Home Caregiver	Married	Yes	No	Very concerned	Extremely concerned	Extremely concerned	Extremely concerned	Health impacts of COVID-19	Some college or associate's degree	$50,000 - $74,999		6 County region	35-44	1	No	No	Female 35 thru 44	1	0.763453	0.763453	0.730096	0.730096	0.802961	0.586239
2	39	Female	Knox County	No	No	No	No	Yes	No	Work full-time	Single	No	No	Not very concerned	Not very concerned	Very concerned	Extremely concerned	Health impacts of COVID-19	High school graduate or GED	$15,000 - $24,999		6 County region	35-44	1	No	No	Female 35 thru 44	1	0.763453	0.763453	0.730096	0.730096	0.802961	0.586239
2	55	Male	Sullivan County	No	No	No	No	Yes	No	Retired	Divorced	No	Yes	Very concerned	Extremely concerned	Extremely concerned	Extremely concerned	Health impacts of COVID-19	High school graduate or GED	$25,000 - $34,999		6 County region	55-64	1	No	No	Male 55 thru 65	1	1.15827	1.15827	0.730096	0.730096	1.10949	0.810036
2	30	Male	Knox County	No	No	No	No	Yes	No	Unemployed	Separated	No	Yes	Somewhat concerned	Extremely concerned	Not very concerned	Extremely concerned	Health impacts of COVID-19	Some college or associate's degree	$25,000 - $34,999		6 County region	25-34	1	No	No	Male 25 thru 34	1	1.42702	1.42702	0.730096	0.730096	1.31307	0.958666
2	75	Female	Hamilton County	No	No	No	No	Yes	No	Retired	Divorced	No	Yes	Somewhat concerned	Somewhat concerned	Very concerned	Somewhat concerned	Health impacts of COVID-19	High school graduate or GED	Less than $15,000		6 County region	65+	1	No	No	Female 65+	1	1.01201	1.01201	0.730096	0.730096	1.05035	0.766853
2	41	Female	Hamilton County	No	No	No	No	Yes	No	Work full-time	Married	No	No	Not very concerned	Not very concerned	Somewhat concerned	Somewhat concerned	Economic impacts of COVID-19	High school graduate or GED	$35,000 - $49,999		6 County region	35-44	1	No	No	Female 35 thru 44	1	0.763453	0.763453	0.730096	0.730096	0.802961	0.586239
2	27	Male	Shelby County	No	No	Yes	No	No	No	Unemployed	Separated	No	Yes	Extremely concerned	Very concerned	Extremely concerned	Extremely concerned	Health impacts of COVID-19	Less than high school graduate	$15,000 - $24,999		6 County region	25-34	1	No	No	Male 25 thru 34	0.717294	1.42702	1.02359	0.730096	0.523693	1.31307	0.687645	1.15163	0.826056
2	19	Female	Shelby County	No	No	No	No	Yes	No	Work part-time			No	Not at all concerned	Extremely concerned	Not very concerned	Not very concerned	Health impacts of COVID-19				6 County region	18-24	1	No	No	Female 18 thru 24	1	0.654556	0.654556	0.730096	0.730096	0.698121	0.509695
2	92	Female	Hamilton County	No	No	No	No	Yes	No	Retired	Single	No	No	Not very concerned	Not very concerned	Not very concerned	Somewhat concerned	Economic impacts of COVID-19	Some college or associate's degree	$35,000 - $49,999		6 County region	65+	1	No	No	Female 65+	1	1.01201	1.01201	0.730096	0.730096	1.05035	0.766853
2	41	Male	Davidson County	No	No	No	No	Yes	No	Work full-time	Married	Yes	Yes	Not very concerned	Not very concerned	Somewhat concerned	Somewhat concerned	Economic impacts of COVID-19	Bachelor's degree or higher	$50,000 - $74,999		6 County region	35-44	1	No	No	Male 35 thru 44	1	1.00481	1.00481	0.730096	0.730096	0.954872	0.697148
2	23	Female	Hamilton County	No	No	No	No	Yes	No	Work full-time	Single	No	No	Extremely concerned	Extremely concerned	Extremely concerned	Extremely concerned	Health impacts of COVID-19	Bachelor's degree or higher	$50,000 - $74,999		6 County region	18-24	1	No	No	Female 18 thru 24	1	0.654556	0.654556	0.730096	0.730096	0.698121	0.509695
2	47	Female	Knox County	No	No	No	No	Yes	No	Work full-time	Married	No	No	Not very concerned	Not very concerned	Somewhat concerned	Somewhat concerned	Economic impacts of COVID-19	Some college or associate's degree	$25,000 - $34,999		6 County region	45-54	1	No	No	Female 45 thru 54	1	0.817142	0.817142	0.730096	0.730096	0.850522	0.620963
2	56	Female	Sullivan County	No	No	No	No	Yes	No	Unemployed	Divorced	No	Yes	Very concerned	Very concerned	Somewhat concerned	Extremely concerned	Economic impacts of COVID-19	Some college or associate's degree	Less than $15,000		6 County region	55-64	1	No	No	Female 55 thru 64	1	0.850711	0.850711	0.730096	0.730096	0.862899	0.629999
2	31	Female	Shelby County	No	No	Yes	No	No	No	Work part-time	Single	Yes	No	Very concerned	Very concerned	Very concerned	Very concerned	Health impacts of COVID-19	Some college or associate's degree	$25,000 - $34,999		6 County region	25-34	1	No	No	Female 25 thru 34	0.717294	0.911825	0.654046	0.730096	0.523693	0.854477	0.447484	0.857145	0.614825
2	44	Female	Davidson County	No	No	Yes	No	No	No	Work full-time	Married	Yes	No	Very concerned	Very concerned	Somewhat concerned	Very concerned	Health impacts of COVID-19	Bachelor's degree or higher	$75,000 - $99,999		6 County region	35-44	1	No	No	Female 35 thru 44	0.717294	0.763453	0.54762	0.730096	0.523693	0.802961	0.420505	0.733349	0.526027
2	54	Female	Sullivan County	No	No	No	No	Yes	No	Work full-time	Divorced	No	Yes	Extremely concerned	Somewhat concerned	Very concerned	Extremely concerned	Economic impacts of COVID-19	High school graduate or GED	Less than $15,000		6 County region	45-54	1	No	No	Female 45 thru 54	1	0.817142	0.817142	0.730096	0.730096	0.850522	0.620963
2	65	Male	Madison County	No	No	No	No	Yes	No	Work full-time	Single	No	Yes	Not very concerned	Somewhat concerned	Somewhat concerned	Very concerned	Economic impacts of COVID-19	Bachelor's degree or higher	$75,000 - $99,999		6 County region	65+	1	No	No	Male 65+	1	1.7571	1.7571	0.730096	0.730096	1.31733	0.961778
2	38	Female	Knox County	No	No	No	No	Yes	No	Work full-time	Separated	No	No	Very concerned	Not very concerned	Very concerned	Somewhat concerned	Economic impacts of COVID-19	Some college or associate's degree	$25,000 - $34,999		6 County region	35-44	1	No	No	Female 35 thru 44	1	0.763453	0.763453	0.730096	0.730096	0.802961	0.586239
2	37	Male	Knox County	No	No	Yes	No	No	No	Work part-time	Divorced	No	No	Somewhat concerned	Somewhat concerned	Somewhat concerned	Extremely concerned	Economic impacts of COVID-19	Some college or associate's degree	$25,000 - $34,999		6 County region	35-44	1	No	No	Male 35 thru 44	0.717294	1.00481	0.720747	0.730096	0.523693	0.954872	0.50006	1.07527	0.771287
2	33	Female	Shelby County	No	No	No	No	Yes	No	Work full-time	Married	No	Yes	Somewhat concerned	Somewhat concerned	Somewhat concerned	Very concerned	Economic impacts of COVID-19	Bachelor's degree or higher	$50,000 - $74,999		6 County region	25-34	1	No	No	Female 25 thru 34	1	0.911825	0.911825	0.730096	0.730096	0.854477	0.62385
2	21	Male	Knox County	Yes	No	No	No	No	No	Work full-time	Married	No	Yes	Not very concerned	Very concerned	Extremely concerned	Very concerned	Health impacts of COVID-19	High school graduate or GED	$15,000 - $24,999		6 County region	18-24	1	Yes	No	Male 18 thru 24	1	1.23261	1.23261	0.730096	0.730096	1.24389	0.908157
2	28	Male	Davidson County	No	No	No	No	Yes	No	Work full-time	Married	Yes	Yes	Extremely concerned	Very concerned	Extremely concerned	Extremely concerned	Economic impacts of COVID-19	Some college or associate's degree	$50,000 - $74,999		6 County region	25-34	1	No	No	Male 25 thru 34	1	1.42702	1.42702	0.730096	0.730096	1.31307	0.958666
2	35	Female	Shelby County	No	No	No	No	Yes	No	Work full-time	Living with someone	No	No	Somewhat concerned	Somewhat concerned	Somewhat concerned	Extremely concerned	Economic impacts of COVID-19	Bachelor's degree or higher	$150,000 or more		6 County region	35-44	1	No	No	Female 35 thru 44	1	0.763453	0.763453	0.730096	0.730096	0.802961	0.586239
2	29	Female	Davidson County	No	No	No	No	Yes	No	Unemployed	Dating	No	Yes	Very concerned	Extremely concerned	Extremely concerned	Extremely concerned	Economic impacts of COVID-19	High school graduate or GED	Less than $15,000		6 County region	25-34	1	No	No	Female 25 thru 34	1	0.911825	0.911825	0.730096	0.730096	0.854477	0.62385
2	44	Female	Knox County	No	No	No	No	Yes	No	Work full-time	Married	No	No	Not at all concerned	Not at all concerned	Not at all concerned	Not very concerned	Economic impacts of COVID-19	Some college or associate's degree	$35,000 - $49,999		6 County region	35-44	1	No	No	Female 35 thru 44	1	0.763453	0.763453	0.730096	0.730096	0.802961	0.586239
2	31	Female	Knox County	No	No	No	No	Yes	No	Looking for work	Married	Yes	No	Somewhat concerned	Somewhat concerned	Very concerned	Very concerned	Economic impacts of COVID-19	Some college or associate's degree	Less than $15,000		6 County region	25-34	1	No	No	Female 25 thru 34	1	0.911825	0.911825	0.730096	0.730096	0.854477	0.62385
2	41	Male	Davidson County	No	No	No	No	Yes	No	Work full-time	Dating	Yes	No	Not at all concerned	Somewhat concerned	Not very concerned	Very concerned	Economic impacts of COVID-19	Some college or associate's degree	$50,000 - $74,999		6 County region	35-44	1	No	No	Male 35 thru 44	1	1.00481	1.00481	0.730096	0.730096	0.954872	0.697148
2	34	Female	Davidson County	No	No	No	No	Yes	No	Work full-time	Married	No	No	Not very concerned	Somewhat concerned	Somewhat concerned	Very concerned	Economic impacts of COVID-19	Bachelor's degree or higher	$100,000 - $149,999		6 County region	25-34	1	No	No	Female 25 thru 34	1	0.911825	0.911825	0.730096	0.730096	0.854477	0.62385
2	28	Female	Knox County	No	No	No	No	Yes	No	Work part-time	Married	No	No	Somewhat concerned	Somewhat concerned	Very concerned	Extremely concerned	Economic impacts of COVID-19	High school graduate or GED	$50,000 - $74,999		6 County region	25-34	1	No	No	Female 25 thru 34	1	0.911825	0.911825	0.730096	0.730096	0.854477	0.62385
2	60	Female	Sullivan County	No	No	No	No	Yes	No	Retired	Single	No	No	Extremely concerned	Extremely concerned	Extremely concerned	Extremely concerned	Economic impacts of COVID-19	Some college or associate's degree	$50,000 - $74,999		6 County region	55-64	1	No	No	Female 55 thru 64	1	0.850711	0.850711	0.730096	0.730096	0.862899	0.629999
2	39	Female	Madison County	No	No	No	No	Yes	No	Unemployed	Married	No	No	Somewhat concerned	Very concerned	Very concerned	Very concerned	Economic impacts of COVID-19	High school graduate or GED	Less than $15,000		6 County region	35-44	1	No	No	Female 35 thru 44	1	0.763453	0.763453	0.730096	0.730096	0.802961	0.586239
2	39	Female	Shelby County	No	No	No	No	Yes	No	Retired	Married	Yes	No	Not at all concerned	Somewhat concerned	Not very concerned	Very concerned	Economic impacts of COVID-19	Some college or associate's degree	$75,000 - $99,999		6 County region	35-44	1	No	No	Female 35 thru 44	1	0.763453	0.763453	0.730096	0.730096	0.802961	0.586239
2	76	Male	Hamilton County	No	No	No	No	Yes	No	Retired	Single	No	Yes	Not very concerned	Not very concerned	Somewhat concerned	Very concerned	Health impacts of COVID-19	Bachelor's degree or higher	$35,000 - $49,999		6 County region	65+	1	No	No	Male 65+	1	1.7571	1.7571	0.730096	0.730096	1.31733	0.961778
2	61	Female	Shelby County	No	No	No	No	Yes	No	Work part-time	Married	No	Yes	Somewhat concerned	Extremely concerned	Extremely concerned	Extremely concerned	Health impacts of COVID-19	Bachelor's degree or higher	$150,000 or more		6 County region	55-64	1	No	No	Female 55 thru 64	1	0.850711	0.850711	0.730096	0.730096	0.862899	0.629999
2	53	Female	Shelby County	No	No	Yes	No	No	No	Work full-time	Single	Yes	No	Extremely concerned	Very concerned	Extremely concerned	Extremely concerned	Health impacts of COVID-19	Some college or associate's degree	$35,000 - $49,999		6 County region	45-54	1	No	No	Female 45 thru 54	0.717294	0.817142	0.586131	0.730096	0.523693	0.850522	0.445413	0.900985	0.646271
2	62	Female	Shelby County	No	No	No	No	Yes	No	Work part-time	Divorced	Yes	No	Not at all concerned	Not very concerned	Not very concerned	Somewhat concerned	Health impacts of COVID-19	High school graduate or GED	Less than $15,000		6 County region	55-64	1	No	No	Female 55 thru 64	1	0.850711	0.850711	0.730096	0.730096	0.862899	0.629999
2	28	Male	Shelby County	No	Yes	No	No	No	No	Work part-time	Single	No	No	Somewhat concerned	Very concerned	Very concerned	Somewhat concerned	Health impacts of COVID-19	High school graduate or GED	$35,000 - $49,999		6 County region	25-34	1	Yes	No	Male 25 thru 34	1	1.42702	1.42702	0.730096	0.730096	1.31307	0.958666
2	33	Female	Shelby County	No	No	Yes	No	No	No	Work full-time	Single	Yes	No	Very concerned	Very concerned	Very concerned	Very concerned	Economic impacts of COVID-19	High school graduate or GED	$15,000 - $24,999		6 County region	25-34	1	No	No	Female 25 thru 34	0.717294	0.911825	0.654046	0.730096	0.523693	0.854477	0.447484	0.857145	0.614825
2	53	Female	Knox County	Yes	No	Yes	No	Yes	No	Retired	Dating	No	No	Not at all concerned	Not very concerned	Not very concerned	Not at all concerned	Health impacts of COVID-19	High school graduate or GED	$15,000 - $24,999		6 County region	45-54	3	No	No	Female 45 thru 54	0.717294	0.817142	0.586131	0.730096	0.523693	0.850522	0.445413	0.900985	0.646271
2	53	Female	Shelby County	No	No	Yes	No	No	No	Work full-time	Married	No	Yes	Somewhat concerned	Extremely concerned	Extremely concerned	Extremely concerned	Health impacts of COVID-19	Bachelor's degree or higher	$150,000 or more		6 County region	45-54	1	No	No	Female 45 thru 54	0.717294	0.817142	0.586131	0.730096	0.523693	0.850522	0.445413	0.900985	0.646271
2	38	Male	Knox County	No	No	No	No	Yes	No	Work full-time	Married	Yes	No	Extremely concerned	Extremely concerned	Extremely concerned	Extremely concerned	Health impacts of COVID-19	Bachelor's degree or higher	$100,000 - $149,999		6 County region	35-44	1	No	No	Male 35 thru 44	1	1.00481	1.00481	0.730096	0.730096	0.954872	0.697148
2	23	Female	Davidson County	No	No	No	No	Yes	No	Student	Single	No	Yes	Somewhat concerned	Very concerned	Extremely concerned	Extremely concerned	Economic impacts of COVID-19	Bachelor's degree or higher	$25,000 - $34,999		6 County region	18-24	1	No	No	Female 18 thru 24	1	0.654556	0.654556	0.730096	0.730096	0.698121	0.509695
2	57	Female	Davidson County	No	No	No	No	Yes	No	Work full-time	Married	Yes	Yes	Very concerned	Very concerned	Very concerned	Extremely concerned	Health impacts of COVID-19	Bachelor's degree or higher	$50,000 - $74,999		6 County region	55-64	1	No	No	Female 55 thru 64	1	0.850711	0.850711	0.730096	0.730096	0.862899	0.629999
2	34	Male	Shelby County	No	No	No	No	Yes	No	Work full-time	Married	Yes	No	Extremely concerned	Very concerned	Extremely concerned	Extremely concerned	Health impacts of COVID-19	Bachelor's degree or higher	$100,000 - $149,999		6 County region	25-34	1	No	No	Male 25 thru 34	1	1.42702	1.42702	0.730096	0.730096	1.31307	0.958666
2	28	Male	Davidson County	No	No	No	No	Yes	No	Work full-time	Living with someone	Yes	No	Not at all concerned	Not at all concerned	Not at all concerned	Somewhat concerned	Economic impacts of COVID-19	High school graduate or GED	$35,000 - $49,999		6 County region	25-34	1	No	No	Male 25 thru 34	1	1.42702	1.42702	0.730096	0.730096	1.31307	0.958666
2	45	Male	Shelby County	No	No	Yes	No	No	No	Work full-time	Married	Yes	Yes	Extremely concerned	Very concerned	Extremely concerned	Very concerned	Health impacts of COVID-19	Bachelor's degree or higher	$75,000 - $99,999		6 County region	45-54	1	No	No	Male 45 thru 54	0.717294	1.2468	0.894324	0.730096	0.523693	1.43334	0.75063	1.51878	1.08941
2	57	Female	Knox County	No	No	No	No	Yes	No	Work full-time	Married	Yes	Yes	Not very concerned	Not very concerned	Somewhat concerned	Extremely concerned	Economic impacts of COVID-19	Some college or associate's degree	$35,000 - $49,999		6 County region	55-64	1	No	No	Female 55 thru 64	1	0.850711	0.850711	0.730096	0.730096	0.862899	0.629999
2	19	Female	Hamilton County	No	No	Yes	No	No	No	Work part-time	Single	No	No	Not very concerned	Not very concerned	Not at all concerned	Very concerned	Economic impacts of COVID-19	High school graduate or GED	$150,000 or more		6 County region	18-24	1	No	No	Female 18 thru 24	0.717294	0.654556	0.469509	0.730096	0.523693	0.698121	0.365601	0.394655	0.283084
2	48	Male	Shelby County	No	No	No	No	Yes	No	Work full-time	Married	Yes	No	Not very concerned	Somewhat concerned	Somewhat concerned	Very concerned	Health impacts of COVID-19	Bachelor's degree or higher	$150,000 or more		6 County region	45-54	1	No	No	Male 45 thru 54	1	1.2468	1.2468	0.730096	0.730096	1.43334	1.04648
2	66	Female	Shelby County	No	No	Yes	No	No	No	Retired	Single	No	No	Not at all concerned	Very concerned	Very concerned	Very concerned	Economic impacts of COVID-19	Some college or associate's degree	$50,000 - $74,999		6 County region	65+	1	No	No	Female 65+	0.717294	1.01201	0.72591	0.730096	0.523693	1.05035	0.550059	1.47113	1.05523
2	61	Female	Hamilton County	No	No	No	No	Yes	No	Retired	Married	No	Yes	Very concerned	Very concerned	Very concerned	Somewhat concerned	Health impacts of COVID-19	Bachelor's degree or higher	$100,000 - $149,999		6 County region	55-64	1	No	No	Female 55 thru 64	1	0.850711	0.850711	0.730096	0.730096	0.862899	0.629999
2	75	Female	Shelby County	No	No	No	No	Yes	No	Retired	Divorced	No	No	Somewhat concerned	Somewhat concerned	Somewhat concerned	Extremely concerned	Economic impacts of COVID-19	Some college or associate's degree	$25,000 - $34,999		6 County region	65+	1	No	No	Female 65+	1	1.01201	1.01201	0.730096	0.730096	1.05035	0.766853
2	43	Female	Shelby County	No	Yes	No	No	Yes	No	Work full-time	Married	Yes	No	Somewhat concerned	Very concerned	Very concerned	Extremely concerned	Economic impacts of COVID-19	Some college or associate's degree	$25,000 - $34,999		6 County region	35-44	2	No	No	Female 35 thru 44	1	0.763453	0.763453	0.730096	0.730096	0.802961	0.586239
2	48	Female	Sullivan County	No	No	No	No	Yes	No	Looking for work	Divorced	No	No	Not very concerned	Very concerned	Very concerned	Very concerned	Economic impacts of COVID-19	High school graduate or GED	Less than $15,000		6 County region	45-54	1	No	No	Female 45 thru 54	1	0.817142	0.817142	0.730096	0.730096	0.850522	0.620963
2	67	Female	Knox County	No	No	No	No	Yes	No	Retired	Divorced	No	Yes	Very concerned	Very concerned	Very concerned	Very concerned	Health impacts of COVID-19	Bachelor's degree or higher	$35,000 - $49,999		6 County region	65+	1	No	No	Female 65+	1	1.01201	1.01201	0.730096	0.730096	1.05035	0.766853
2	35	Female	Hamilton County	No	No	Yes	No	No	No	Work full-time	Single	Yes	No	Extremely concerned	Extremely concerned	Extremely concerned	Extremely concerned	Health impacts of COVID-19	Some college or associate's degree	$25,000 - $34,999		6 County region	35-44	1	No	No	Female 35 thru 44	0.717294	0.763453	0.54762	0.730096	0.523693	0.802961	0.420505	0.733349	0.526027
2	57	Female	Sullivan County	No	No	No	No	Yes	No	Work full-time	Married	Yes	Yes	Not very concerned	Not very concerned	Not very concerned	Somewhat concerned	Economic impacts of COVID-19	High school graduate or GED	$50,000 - $74,999		6 County region	55-64	1	No	No	Female 55 thru 64	1	0.850711	0.850711	0.730096	0.730096	0.862899	0.629999
2	38	Male	Knox County	No	No	No	No	Yes	No	Work full-time	Married	Yes	No	Extremely concerned	Very concerned	Extremely concerned	Extremely concerned	Economic impacts of COVID-19	Bachelor's degree or higher	$100,000 - $149,999		6 County region	35-44	1	No	No	Male 35 thru 44	1	1.00481	1.00481	0.730096	0.730096	0.954872	0.697148
2	58	Female	Davidson County	No	No	No	No	Yes	No	Retired	Single	No	Yes	Not very concerned	Somewhat concerned	Somewhat concerned	Very concerned	Economic impacts of COVID-19	Bachelor's degree or higher	Less than $15,000		6 County region	55-64	1	No	No	Female 55 thru 64	1	0.850711	0.850711	0.730096	0.730096	0.862899	0.629999
2	25	Male	Shelby County	No	No	No	No	No	No	Work full-time	Divorced	Yes	No	Very concerned	Somewhat concerned	Very concerned	Extremely concerned	Health impacts of COVID-19	High school graduate or GED	$15,000 - $24,999		6 County region	25-34	0	No	No	Male 25 thru 34	1	1.42702	1.42702	0.730096	0.730096	1.31307	0.958666
2	47	Male	Hamilton County	No	No	No	No	Yes	No	Work full-time	Married	Yes	No	Not very concerned	Very concerned	Not very concerned	Somewhat concerned	Economic impacts of COVID-19	Bachelor's degree or higher	$75,000 - $99,999		6 County region	45-54	1	No	No	Male 45 thru 54	1	1.2468	1.2468	0.730096	0.730096	1.43334	1.04648
2	62	Female	Shelby County	No	No	No	No	Yes	No	Retired	Single	No	Yes	Extremely concerned	Extremely concerned	Extremely concerned	Extremely concerned	Health impacts of COVID-19	Bachelor's degree or higher	$50,000 - $74,999		6 County region	55-64	1	No	No	Female 55 thru 64	1	0.850711	0.850711	0.730096	0.730096	0.862899	0.629999
2	18	Female	Knox County	No	No	No	No	Yes	No	Stay-at-Home Caregiver	Dating	No	Yes	Somewhat concerned	Extremely concerned	Extremely concerned	Very concerned	Health impacts of COVID-19	Less than high school graduate	Less than $15,000		6 County region	18-24	1	No	No	Female 18 thru 24	1	0.654556	0.654556	0.730096	0.730096	0.698121	0.509695
2	38	Male	Madison County	No	No	No	No	Yes	No	Unemployed	Single	No	Yes	Very concerned	Very concerned	Extremely concerned	Very concerned	Health impacts of COVID-19	Some college or associate's degree	$35,000 - $49,999		6 County region	35-44	1	No	No	Male 35 thru 44	1	1.00481	1.00481	0.730096	0.730096	0.954872	0.697148
2	35	Male	Hamilton County	No	No	No	No	Yes	No	Work full-time	Dating	No	No	Not very concerned	Not very concerned	Somewhat concerned	Extremely concerned	Economic impacts of COVID-19	Some college or associate's degree	$100,000 - $149,999		6 County region	35-44	1	No	No	Male 35 thru 44	1	1.00481	1.00481	0.730096	0.730096	0.954872	0.697148
2	26	Female	Davidson County	No	No	Yes	No	No	No	Unemployed	Married	Yes	Yes	Extremely concerned	Extremely concerned	Extremely concerned	Extremely concerned	Economic impacts of COVID-19	Bachelor's degree or higher	$15,000 - $24,999		6 County region	25-34	1	No	No	Female 25 thru 34	0.717294	0.911825	0.654046	0.730096	0.523693	0.854477	0.447484	0.857145	0.614825
2	22	Male	Shelby County	No	No	No	No	Yes	No	Work full-time	Single	No	No	Very concerned	Very concerned	Somewhat concerned	Very concerned	Economic impacts of COVID-19	Some college or associate's degree	$50,000 - $74,999		6 County region	18-24	1	No	No	Male 18 thru 24	1	1.23261	1.23261	0.730096	0.730096	1.24389	0.908157
2	48	Female	Sullivan County	No	No	No	Yes	Yes	No	Stay-at-Home Caregiver	Married	Yes	Yes	Somewhat concerned	Very concerned	Somewhat concerned	Very concerned	Health impacts of COVID-19	Bachelor's degree or higher	$100,000 - $149,999		6 County region	45-54	2	No	No	Female 45 thru 54	1	0.817142	0.817142	0.730096	0.730096	0.850522	0.620963
2	29	Female	Sullivan County	No	No	No	No	Yes	No	Work part-time	Married	Yes	Yes	Somewhat concerned	Extremely concerned	Extremely concerned	Very concerned	Health impacts of COVID-19	High school graduate or GED	Less than $15,000		6 County region	25-34	1	No	No	Female 25 thru 34	1	0.911825	0.911825	0.730096	0.730096	0.854477	0.62385
2	57	Male	Madison County	No	No	No	No	Yes	No	Unemployed	Divorced	No	No	Very concerned	Extremely concerned	Extremely concerned	Very concerned	Health impacts of COVID-19	High school graduate or GED	Less than $15,000		6 County region	55-64	1	No	No	Male 55 thru 65	1	1.15827	1.15827	0.730096	0.730096	1.10949	0.810036
2	49	Male	Shelby County	No	No	Yes	No	No	No	Work full-time	Married	Yes	No	Very concerned	Somewhat concerned	Very concerned	Very concerned	Health impacts of COVID-19	Bachelor's degree or higher	$100,000 - $149,999		6 County region	45-54	1	No	No	Male 45 thru 54	0.717294	1.2468	0.894324	0.730096	0.523693	1.43334	0.75063	1.51878	1.08941
2	73	Female	Shelby County	No	No	No	No	Yes	No	Retired	Single	No	No	Not very concerned	Not very concerned	Not very concerned	Somewhat concerned	Health impacts of COVID-19	High school graduate or GED	$15,000 - $24,999		6 County region	65+	1	No	No	Female 65+	1	1.01201	1.01201	0.730096	0.730096	1.05035	0.766853
2	47	Female	Knox County	No	No	No	No	Yes	No	Looking for work	Single	No	No	Somewhat concerned	Very concerned	Very concerned	Extremely concerned	Health impacts of COVID-19	High school graduate or GED	Less than $15,000		6 County region	45-54	1	No	No	Female 45 thru 54	1	0.817142	0.817142	0.730096	0.730096	0.850522	0.620963
2	22	Female	Davidson County	No	No	No	Yes	No	No	Student	Single	Yes	Yes	Extremely concerned	Extremely concerned	Extremely concerned	Very concerned	Economic impacts of COVID-19	Some college or associate's degree	$25,000 - $34,999		6 County region	18-24	1	Yes	No	Female 18 thru 24	1	0.654556	0.654556	0.730096	0.730096	0.698121	0.509695
2	30	Male	Hamilton County	No	No	Yes	No	No	No	Unemployed	Single	Yes	No	Very concerned	Extremely concerned	Extremely concerned	Extremely concerned	Health impacts of COVID-19	Some college or associate's degree	$35,000 - $49,999		6 County region	25-34	1	No	No	Male 25 thru 34	0.717294	1.42702	1.02359	0.730096	0.523693	1.31307	0.687645	1.15163	0.826056
2	56	Female	Hamilton County	No	No	No	No	Yes	No	Work full-time	Married	No	Yes	Somewhat concerned	Somewhat concerned	Very concerned	Very concerned	Health impacts of COVID-19	Some college or associate's degree	$150,000 or more		6 County region	55-64	1	No	No	Female 55 thru 64	1	0.850711	0.850711	0.730096	0.730096	0.862899	0.629999
2	47	Female	Hamilton County	No	No	No	No	Yes	No	Work full-time	Married	Yes	No	Extremely concerned	Extremely concerned	Extremely concerned	Extremely concerned	Health impacts of COVID-19	Bachelor's degree or higher	$150,000 or more		6 County region	45-54	1	No	No	Female 45 thru 54	1	0.817142	0.817142	0.730096	0.730096	0.850522	0.620963
2	40	Female	Knox County	No	No	No	No	Yes	No	Retired	Single	No	No	Somewhat concerned	Somewhat concerned	Somewhat concerned	Somewhat concerned	Economic impacts of COVID-19	Some college or associate's degree	$25,000 - $34,999		6 County region	35-44	1	No	No	Female 35 thru 44	1	0.763453	0.763453	0.730096	0.730096	0.802961	0.586239
2	19	Female	Knox County	No	No	No	No	Yes	No	Work part-time	Single	No	No	Somewhat concerned	Not very concerned	Not very concerned	Very concerned	Economic impacts of COVID-19	High school graduate or GED	$15,000 - $24,999		6 County region	18-24	1	No	No	Female 18 thru 24	1	0.654556	0.654556	0.730096	0.730096	0.698121	0.509695
2	34	Female	Hamilton County	No	No	No	No	Yes	No	Stay-at-Home Caregiver	Married	Yes	No	Not very concerned	Not very concerned	Somewhat concerned	Not very concerned	Economic impacts of COVID-19	Bachelor's degree or higher	$15,000 - $24,999		6 County region	25-34	1	No	No	Female 25 thru 34	1	0.911825	0.911825	0.730096	0.730096	0.854477	0.62385
2	40	Male	Shelby County	No	No	No	No	Yes	No	Work part-time	Separated	No	No	Somewhat concerned	Very concerned	Very concerned	Very concerned	Health impacts of COVID-19	High school graduate or GED	$15,000 - $24,999		6 County region	35-44	1	No	No	Male 35 thru 44	1	1.00481	1.00481	0.730096	0.730096	0.954872	0.697148
2	49	Female	Hamilton County	No	No	No	No	Yes	No	Unemployed	Married	No	Yes	Extremely concerned	Extremely concerned	Extremely concerned	Extremely concerned	Health impacts of COVID-19	Bachelor's degree or higher	Less than $15,000		6 County region	45-54	1	No	No	Female 45 thru 54	1	0.817142	0.817142	0.730096	0.730096	0.850522	0.620963
2	43	Female	Hamilton County	No	No	No	No	Yes	No	Stay-at-Home Caregiver	Living with someone	No	No	Extremely concerned	Extremely concerned	Extremely concerned	Extremely concerned	Health impacts of COVID-19	High school graduate or GED	$15,000 - $24,999		6 County region	35-44	1	No	No	Female 35 thru 44	1	0.763453	0.763453	0.730096	0.730096	0.802961	0.586239
2	37	Female	Shelby County	No	No	No	No	Yes	No	Work full-time	Married	Yes	No	Somewhat concerned	Not very concerned	Very concerned	Somewhat concerned	Health impacts of COVID-19	Some college or associate's degree	$75,000 - $99,999		6 County region	35-44	1	No	No	Female 35 thru 44	1	0.763453	0.763453	0.730096	0.730096	0.802961	0.586239
2	21	Male	Knox County	No	No	No	Yes	Yes	No	Work full-time	Married	No	No	Extremely concerned	Extremely concerned	Extremely concerned	Extremely concerned	Health impacts of COVID-19	Less than high school graduate	Less than $15,000		6 County region	18-24	2	No	No	Male 18 thru 24	1	1.23261	1.23261	0.730096	0.730096	1.24389	0.908157
2	44	Male	Shelby County	No	No	No	No	Yes	No	Work full-time	Married	Yes	No	Not very concerned	Somewhat concerned	Not very concerned	Not very concerned	Economic impacts of COVID-19	Bachelor's degree or higher	$100,000 - $149,999		6 County region	35-44	1	No	No	Male 35 thru 44	1	1.00481	1.00481	0.730096	0.730096	0.954872	0.697148
2	91	Female	Knox County	No	No	No	No	Yes	No	Retired	Single	No	Yes	Extremely concerned	Extremely concerned	Extremely concerned	Extremely concerned	Health impacts of COVID-19	High school graduate or GED	$75,000 - $99,999		6 County region	65+	1	No	No	Female 65+	1	1.01201	1.01201	0.730096	0.730096	1.05035	0.766853
[truncated: 8,583 more rows]
